# Supplementary material for: Structural features of lignin–hemicellulose–pectin (LHP) orchestrate a tailored enzyme cocktail for potential applications in bark biorefineries
Source: Royal Society of Chemistry journal article supplement (doi:10.1039/d3gc00808h), 2023-01-01
Supplement: d3gc00808h1.pdf [file d3gc00808h1.pdf]

## Supplementary Information

Jinze Dou<sup>1\*</sup>; Jincheng Wang<sup>2</sup>; Sami Hietala<sup>3</sup>; Dmitry V. Evtuguin<sup>4</sup>; Tapani Vuorinen<sup>1\*</sup>; Jian Zhao<sup>2</sup>

<sup>1</sup>Department of Bioproducts and Biosystems, Aalto University, Espoo, Finland

<sup>2</sup>State Key Laboratory of Microbial Technology, Shandong University, Qingdao, China

<sup>3</sup>Department of Chemistry, University of Helsinki, Helsinki, Finland

<sup>4</sup>CICECO/Department of Chemistry, University of Aveiro, Aveiro, Portugal

Corresponding author (and address of all authors):

Dr. Jinze Dou ([jinze.dou@aalto.fi](mailto:jinze.dou@aalto.fi)), Department of Bioproducts and Biosystems, Aalto University

Prof. Tapani Vuorinen ([tapani.vuorinen@aalto.fi](mailto:tapani.vuorinen@aalto.fi)), Department of Bioproducts and Biosystems, Aalto University

Lead Contact's email address: [jinze.dou@aalto.fi](mailto:jinze.dou@aalto.fi)

**Supplementary Table 1. Comparative methodologies of hemicellulose purification from switchgrass, wood (or wood pulp) and bark based on the conventional strategy (wood-based) and our strategy (bark).**

|                       | methodology                                                                              | mechanism                                                                                                 | substrate                                                                       | conditions                                                                                                   | ref.                              |
|-----------------------|------------------------------------------------------------------------------------------|-----------------------------------------------------------------------------------------------------------|---------------------------------------------------------------------------------|--------------------------------------------------------------------------------------------------------------|-----------------------------------|
| conventional strategy | sequential extraction with hot water and alkaline                                        | cleaving ester bonds such as O-acetyl groups that is attached to xylan backbone                           | thermo-mechanical pulp from eucalyptus wood                                     | 2% NaOH, 90°C, 2.5 h                                                                                         | Sun et al. 2014 <sup>9</sup>      |
|                       | delignification with peracetic acid and followed with DMSO extraction                    | cleaving lignin's ester bonds                                                                             | eucalyptus wood                                                                 | 85°C, 30 min, pH 4–5 (delignification with peracetic acid)                                                   | Evtugin et al. 2003 <sup>10</sup> |
|                       | high pressure and hot water extraction                                                   | acetic acid formation promotes hemicellulose degradation                                                  | sulfite pulp from spruce and pine                                               | hot water: 200-240°C, 5-60 min, 30-50 bars                                                                   | Borrega et al. 2013 <sup>11</sup> |
|                       | cellulolytic enzyme-aided extraction                                                     | hydrolytic cellulase selectively degrade cellulose                                                        | extracted and peracetic acid delignified switchgrass                            | ball milling and hydrolysis with 30 mg/g cellulase 37°C, 72 h                                                | Ding et al. 2019 <sup>12</sup>    |
| our strategy          | multi-stage pre-treatment followed by peracetic acid delignification and DMSO extraction | elimination of highly peracetic acid reactive components (i.e. extractives; pectin; protein; and tannins) | willow wood; willow bark (whole bark; inner bark; fibre bundle; and parenchyma) | multiple extraction (DCM; acetone; water; citric acid; pepsin; 0.1M NaOH) and peracetic acid delignification | present study                     |

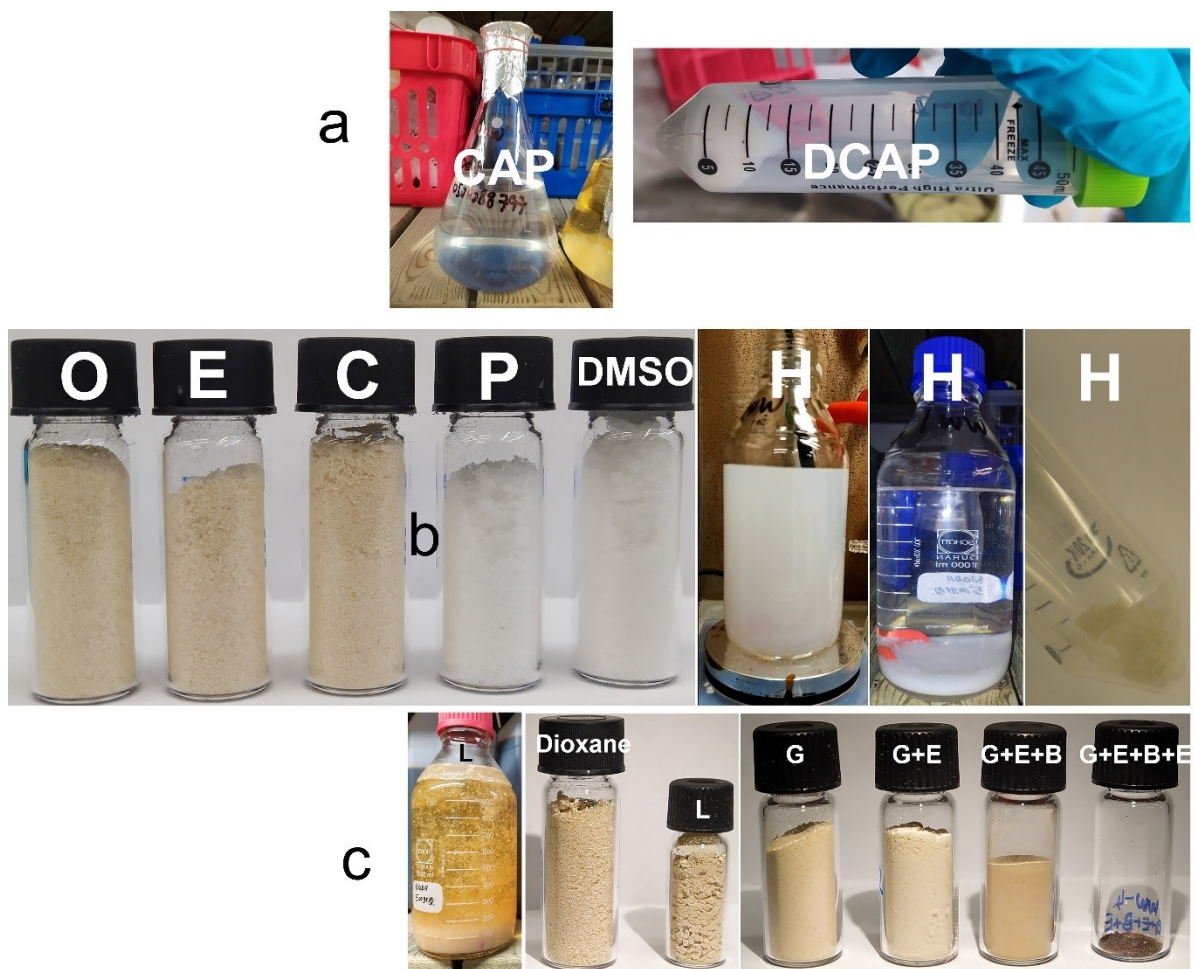

**Supplementary Fig. 1 Photographs of the original (O), solid residues after the Soxhlet extraction (E), solid residues after the citric acid treatment (C) from the willow wood (WW). a** Pectin purification -> citric acid treated pectin (CAP) and dialysis purified pectin (DCAP). **b** Hemicellulose recovery -> solid residues after the peracetic acid treatment (P) and the solid residues after DMSO extraction (DMSO) along with the purified hemicellulose (H). **c** Dioxane lignin recovery -> solid residues after the multiple extraction (citric acid; pepsin; 0.1M NaOH; dioxane-water) (Dioxane), recovered palish yellow color of dioxane lignin (L) in both precipitated form (under +5°C temperature) and solid form, and the reference lignin samples (WCW and CEL) from the previous study<sup>15</sup> (G: ground sample; G+E: solid residues after grinding and extraction; G+E+B (WCW): solid residues after the grinding, extraction, and ball milling; G+E+B+E (CEL): solid residues after grinding, extraction, ball milling, and cellulytic enzymatic purification).

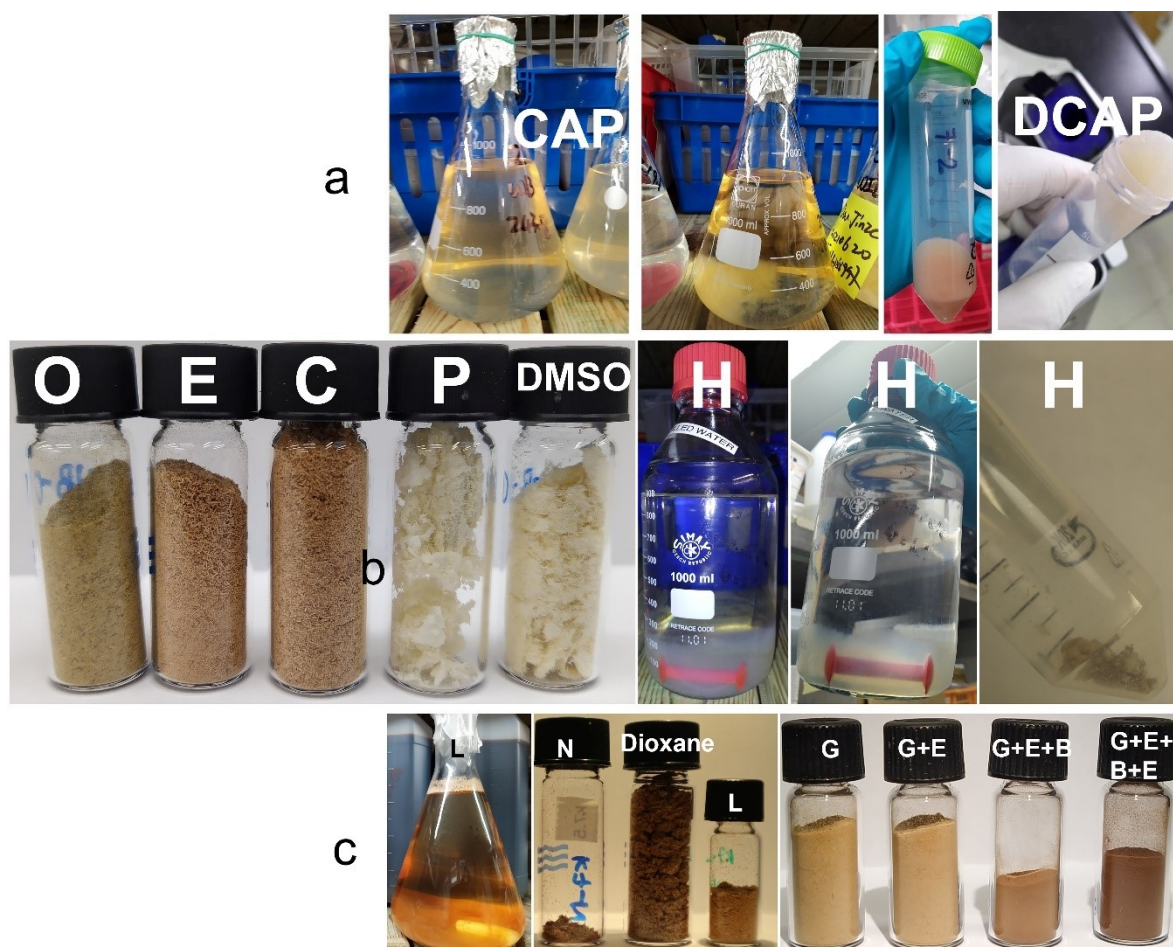

**Supplementary Fig. 2** Photographs of the original (O), solid residues after the Soxhlet extraction (E), solid residues after the citric acid treatment (C) from the willow bark (WB). **a** Pectin purification -> citric acid treated pectin (CAP) and dialysis purified pectin (DCAP). **b** Hemicellulose recovery -> solid residues after the peracetic acid treatment (P) and the solid residues after DMSO extraction (DMSO) along with the purified hemicellulose (H). **c** Dioxane lignin recovery -> solid residues after the multiple extraction (citric acid; pepsin; 0.1M NaOH; dioxane-water) (Dioxane), recovered dioxane lignin (L) in both precipitated form (under +5°C temperature) and solid form, and the reference lignin samples (WCW and CEL) from the previous study<sup>15</sup> (G: ground sample; G+E: solid residues after the grinding and extraction; G+E+B (WCW): solid residues after the grinding, extraction, and ball milling; G+E+B+E (CEL): solid residues after grinding, extraction, ball milling, and cellulytic enzymatic purification).

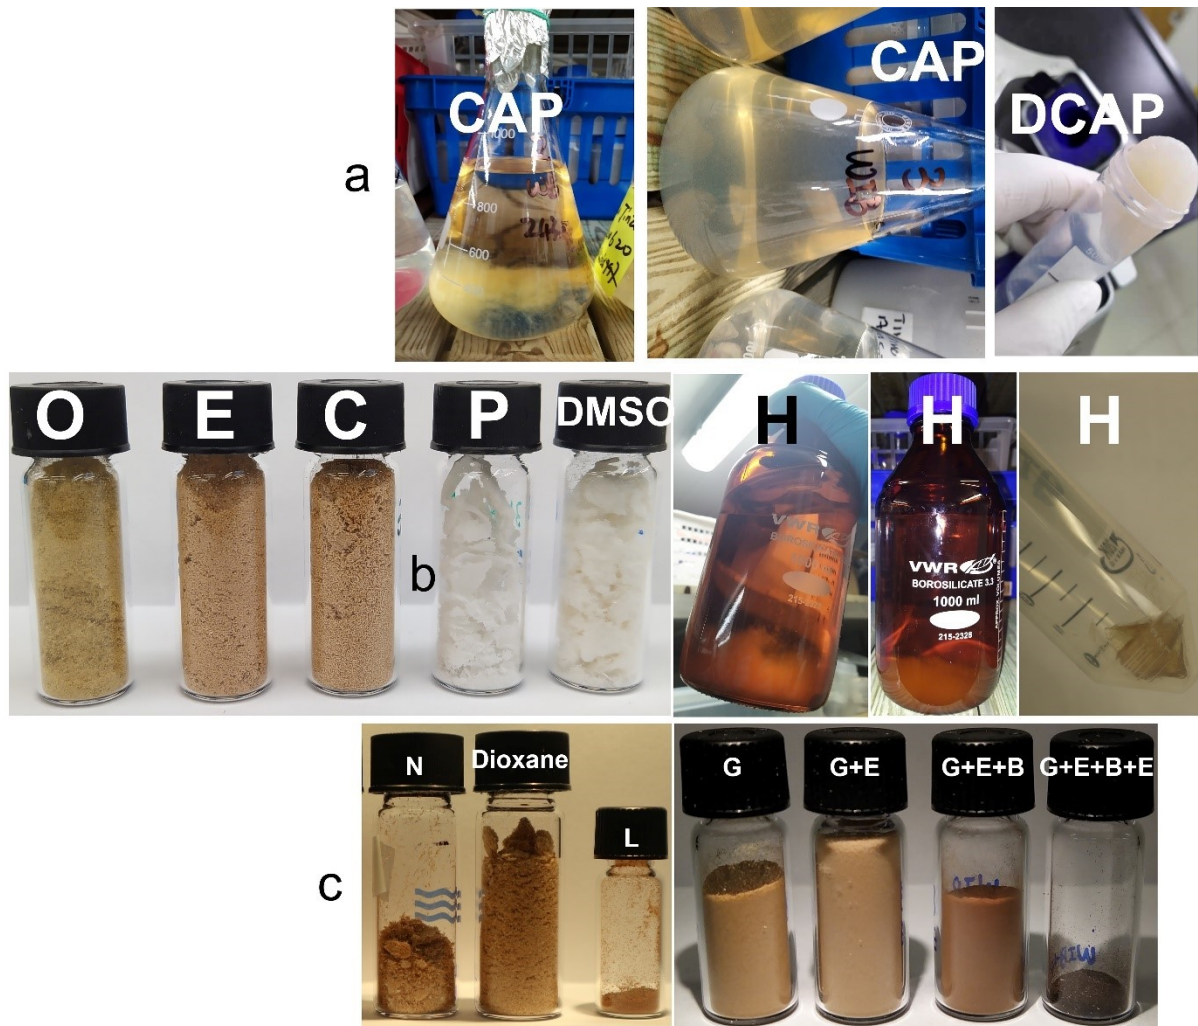

**Supplementary Fig. 3 Photographs of the original (O), solid residues after the Soxhlet extraction (E), solid residues after the citric acid treatment (C) from the willow inner bark (WIB). a** Pectin purification -> citric acid treated pectin (CAP) and dialysis purified pectin (DCAP). **b** Hemicellulose recovery -> solid residues after the peracetic acid treatment (P) and the solid residues after DMSO extraction (DMSO) along with the purified hemicellulose (H). **c** Dioxane lignin recovery -> solid residues after the multiple extraction (citric acid; pepsin; 0.1M NaOH; dioxane-water) (Dioxane), recovered dioxane lignin (L) in both precipitated form (under +5°C temperature) and solid form, and the reference lignin samples (WCW and CEL) from the previous study<sup>15</sup> (G: ground sample; G+E: solid residues after the grinding and extraction; G+E+B (WCW): solid residues after the grinding, extraction, and ball milling; G+E+B+E (CEL): solid residues after grinding, extraction, ball milling, and cellulytic enzymatic purification).

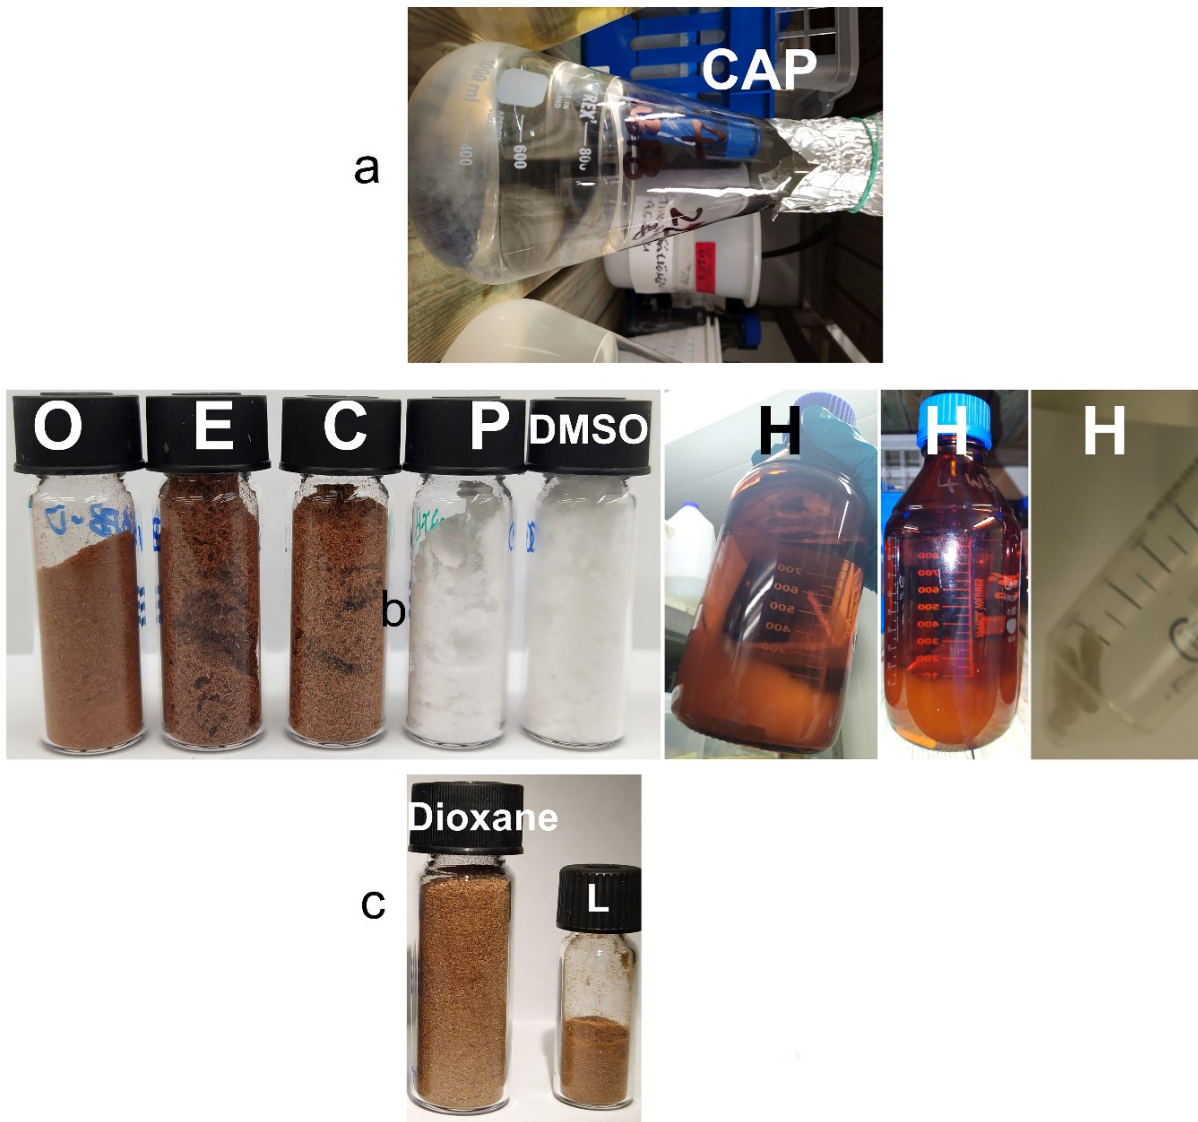

**Supplementary Fig. 4** Photographs of the original (O), solid residues after the Soxhlet extraction (E), solid residues after the citric acid treatment (C) from the willow bark fiber bundle (WBFB). a Pectin purification -> citric acid treated pectin (CAP) and dialysis purified pectin (DCAP). b Hemicellulose recovery -> solid residues after the peracetic acid treatment (P) and the solid residues after DMSO extraction (DMSO) along with the purified hemicellulose (H). c Dioxane lignin recovery -> solid residues after the multiple extraction (citric acid; pepsin; 0.1M NaOH; dioxane-water) (Dioxane), recovered dioxane lignin (L).

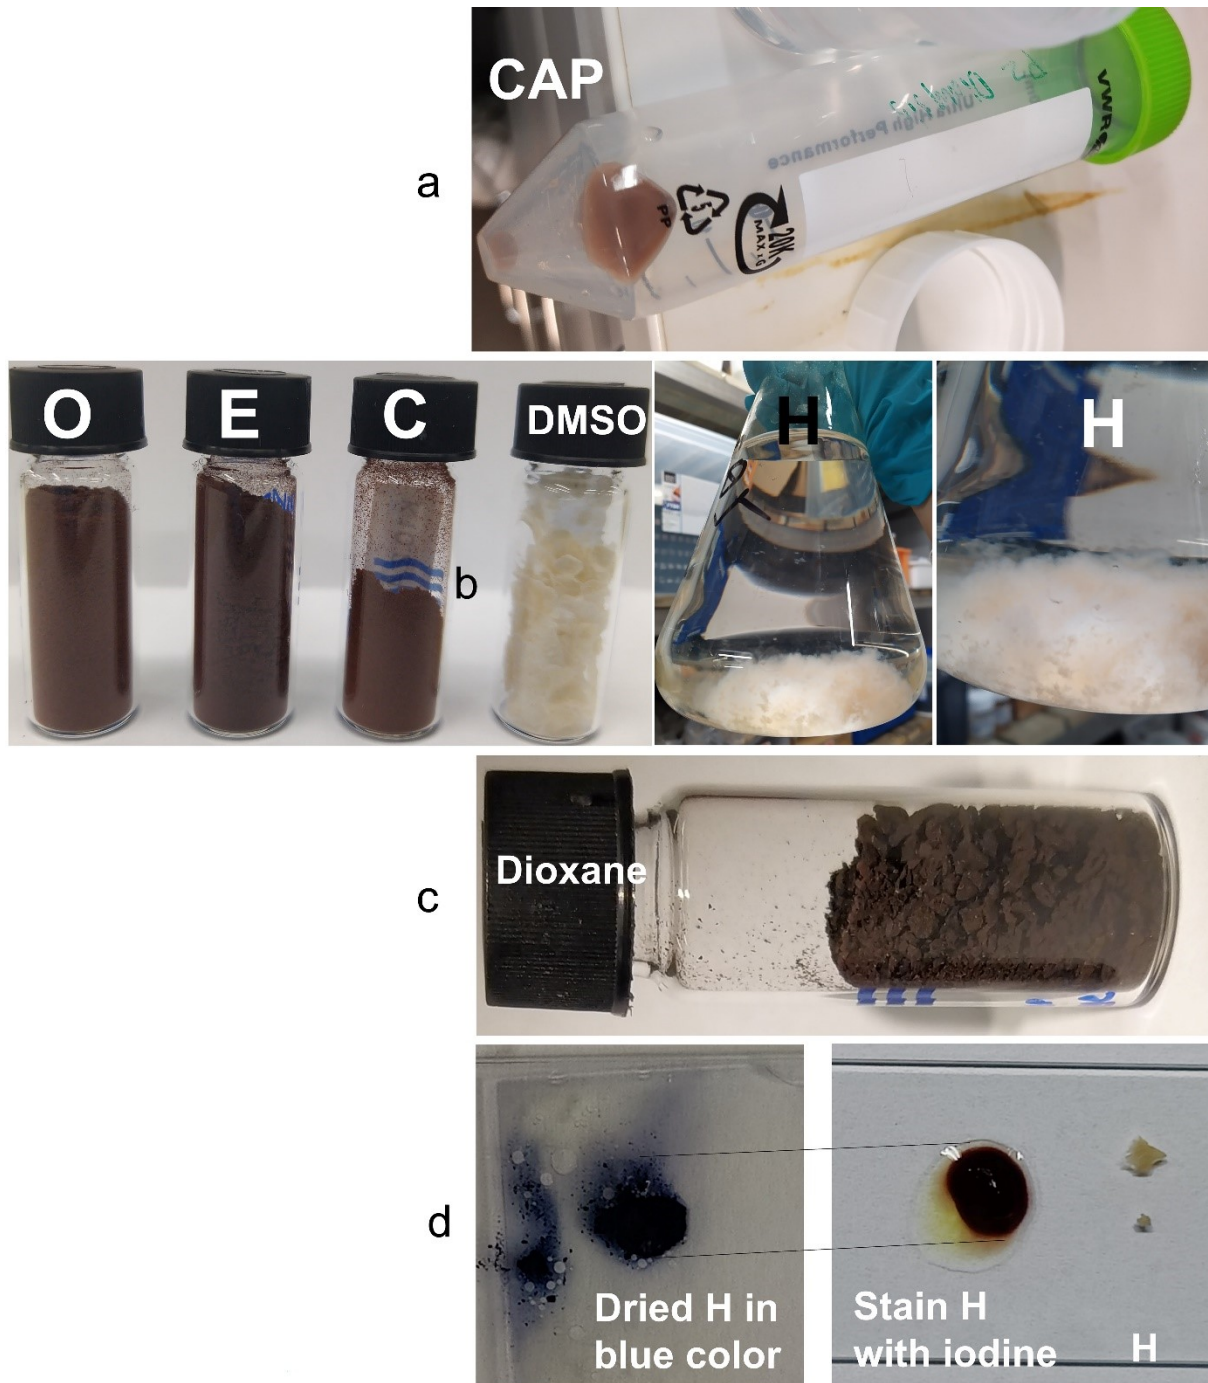

**Supplementary Fig. 5** Photographs of the original (O), solid residues after the Soxhlet extraction (E), solid residues after the citric acid treatment (C) from parenchymatous tissues (parenchyma). **a** Pectin purification -> citric acid treated pectin (CAP). **b** Hemicellulose recovery -> solid residues after DMSO extraction (DMSO) along with the purified hemicellulose (H); **c** Dioxane lignin recovery -> solid residues after the multiple extraction (citric acid; pepsin; 0.1M NaOH; dioxane-water) (Dioxane); **d** Starch test with Lugol's Iodine (blue color) was formed immediately when a drop of Lugol's solution was dropped on the hemicellulose that is on top of the microscopy slide).

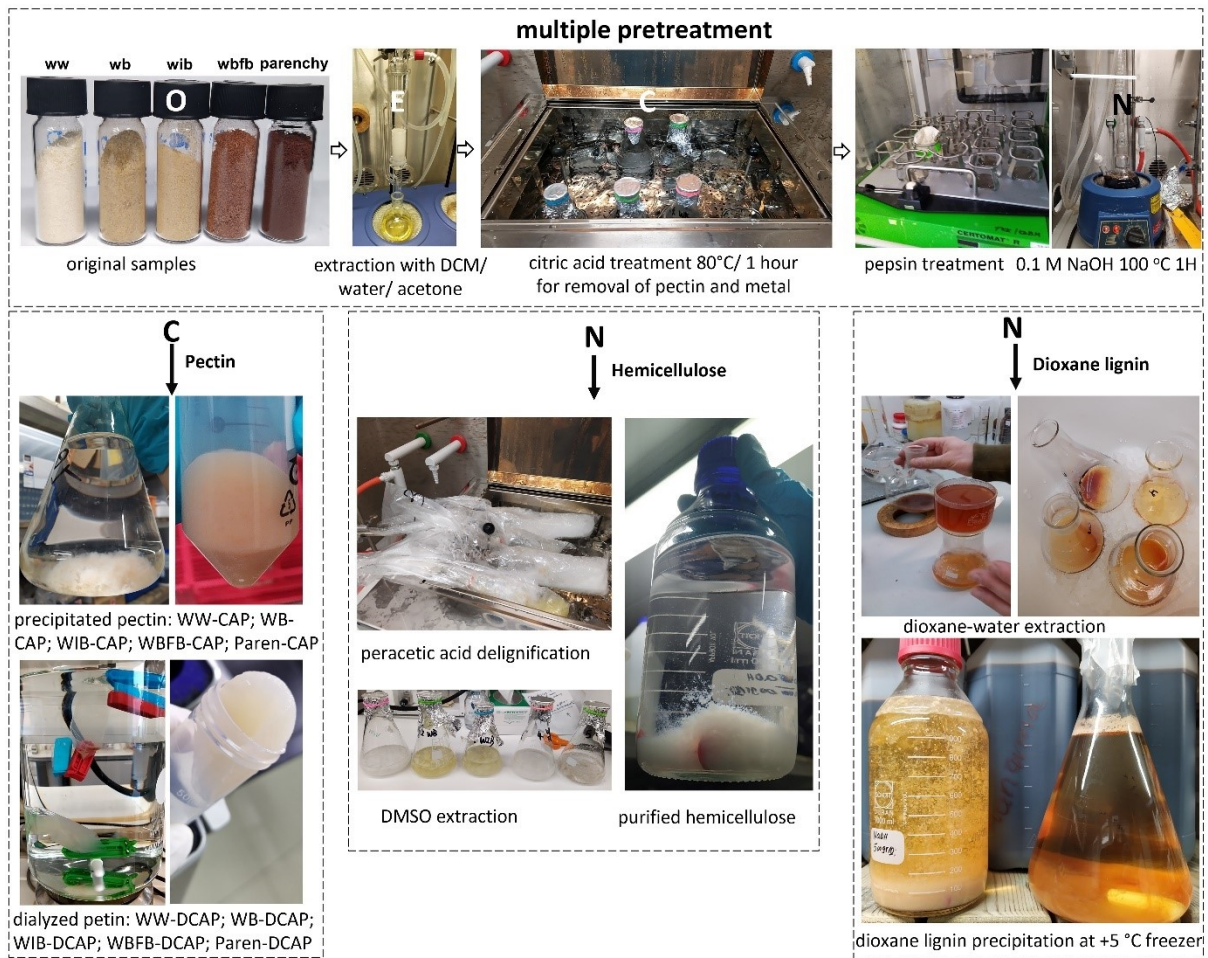

**Supplementary Fig. 6 Fractionation scheme of the recovery of pectin; hemicellulose; and dioxane lignin from willow wood (WW); bark (WB); inner bark (WIB); fiber bundle (WBFB) and parenchyma tissues (parenchyma).**



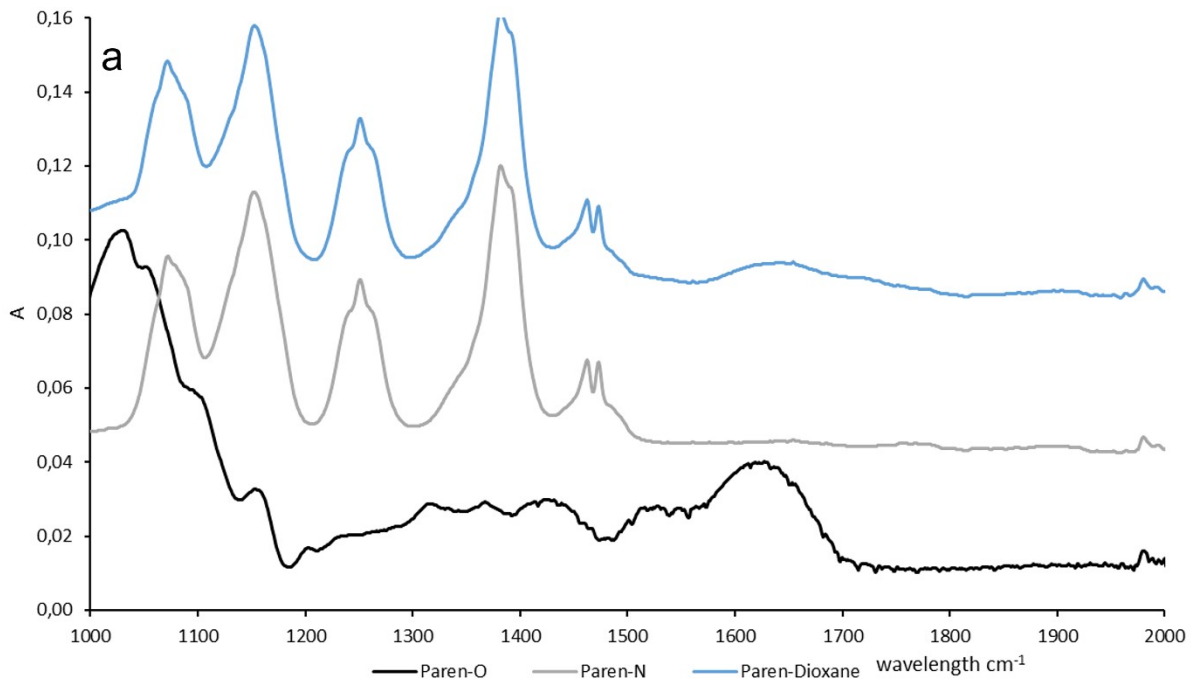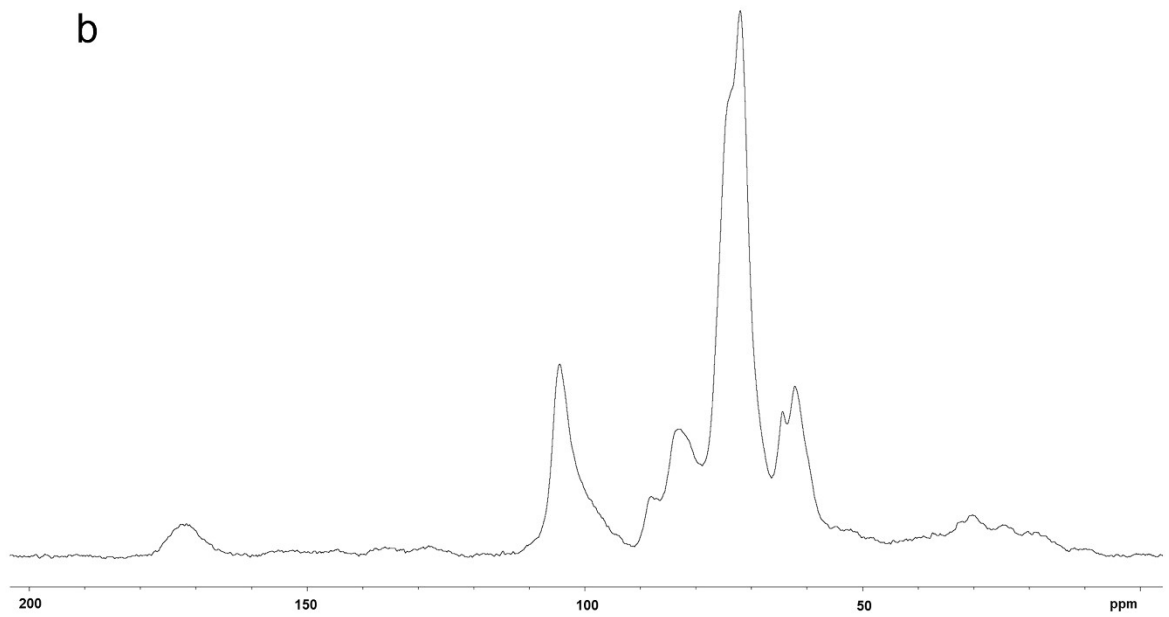

**Supplementary Fig. 7 Chemical characteristics of the purified parenchyma tissues. a FT-IR. b CPMAS NMR spectrum. Parenchyma-N and Parenchyma-Dioxane were included as references for FT-IR comparison.**

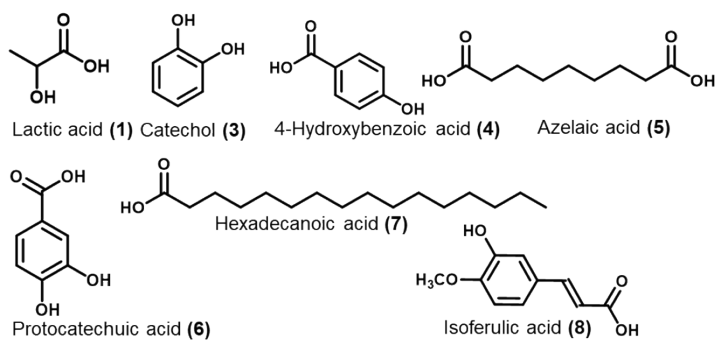

**Supplementary Fig. 8** Detected diethyl ether-soluble 0.1M NaOH hydrolysable tannin-like substances (HTS) from Karin and Klara bark based on GC-MS total-ion chromatogram. Mass spectra of these trimethylsilylated compounds were summarized at **Supplementary Fig. 10**.

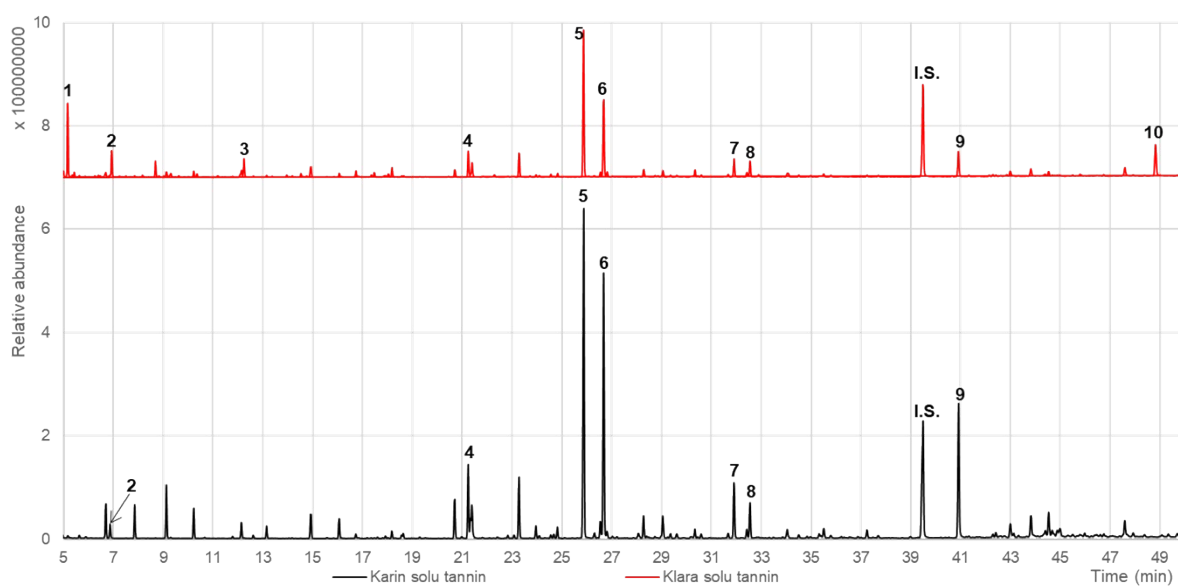

**Supplementary Fig. 9** GC-MS total-ion chromatogram of the diethyl ether-soluble HTS from Karin and Klara bark.

Klara03Sol #95-98 RT: 5,13-5,20 AV: 4 NL: 1,84E7  
T: + c Full ms [33,00-700,00]

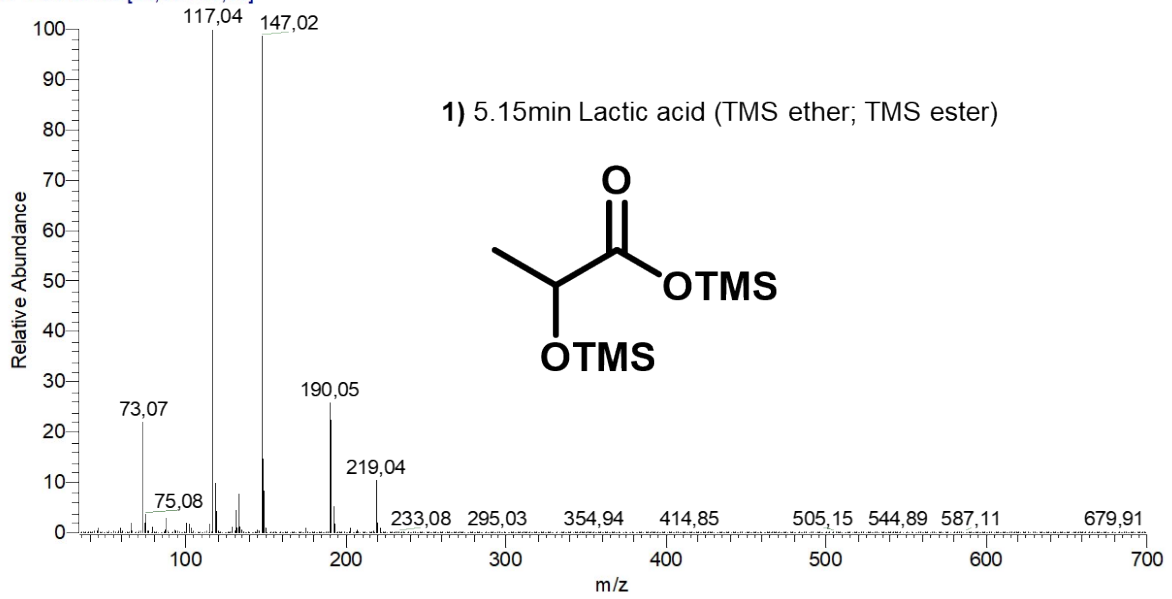

Klara03Sol #173-176 RT: 6,89-6,96 AV: 4 NL: 8,08E6  
T: + c Full ms [33,00-700,00]

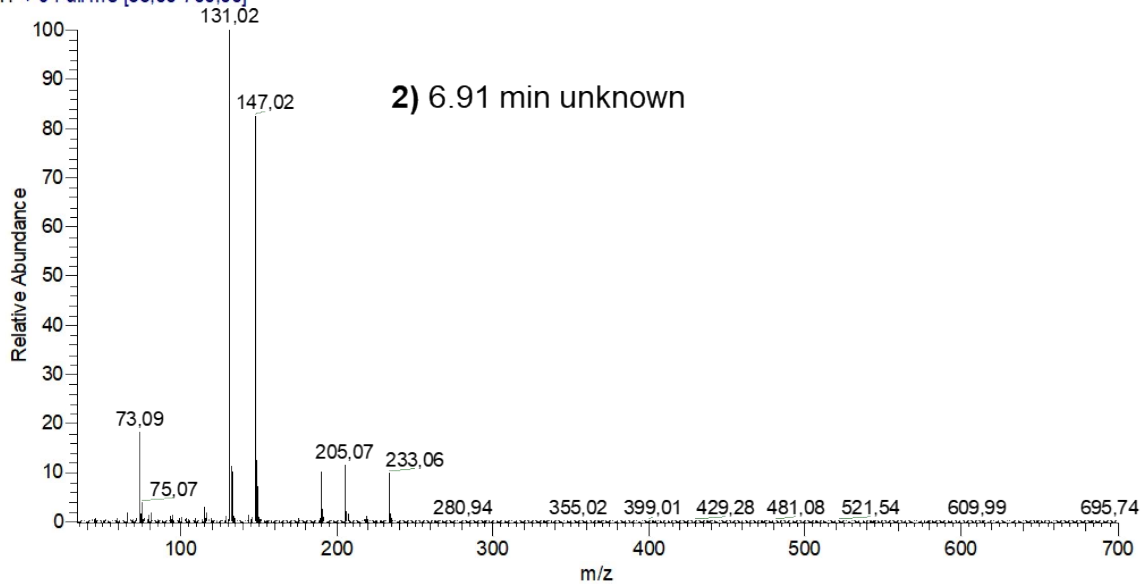

Klara03Sol #408-411 RT: 12.21-12.28 AV: 4 NL: 5,13E6  
T: + c Full ms [33,00-700,00]

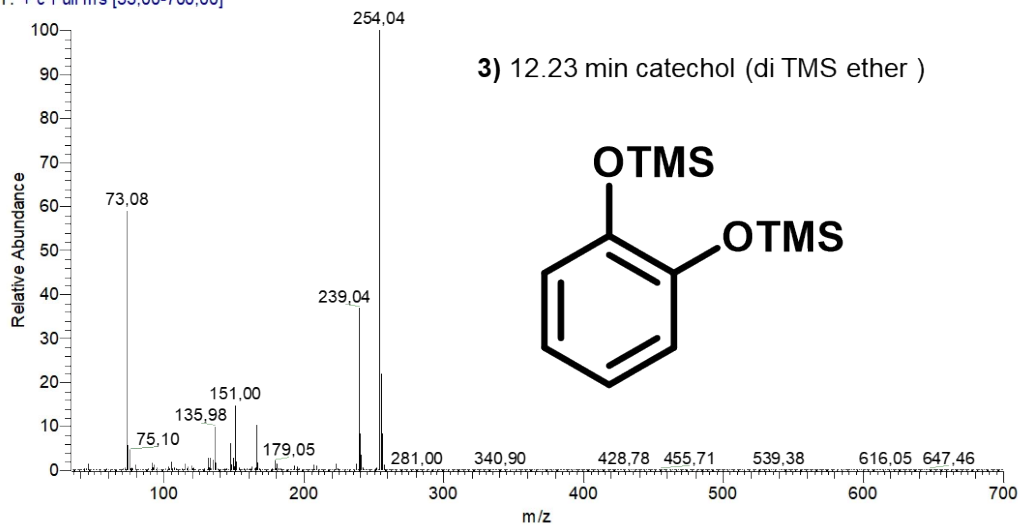

Klara03Sol #806-809 RT: 21.21-21.28 AV: 4 NL: 6,27E6  
T: + c Full ms [33,00-700,00]

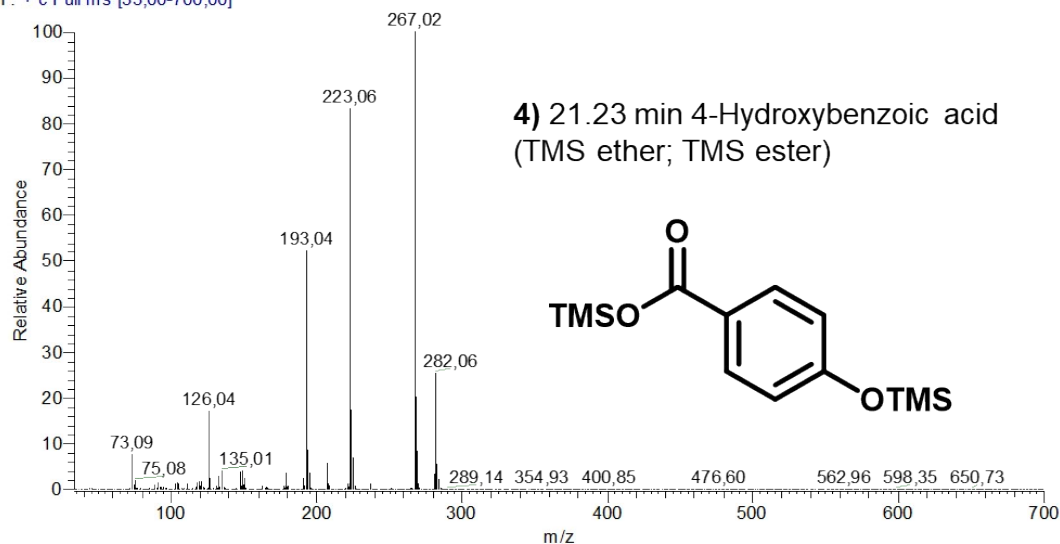

Karin03Sol #1011-1014 RT: 25.84-25.91 AV: 4 NL: 3,62E7  
T: + c Full ms [33,00-700,00]

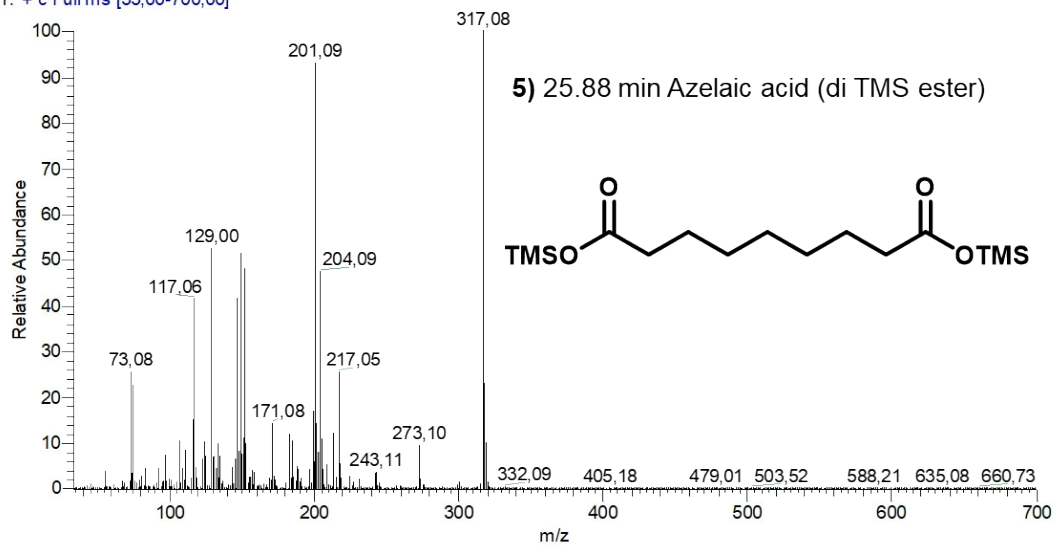

Karin03Sol #1046-1050 RT: 26.63-26.72 AV: 5 NL: 6,78E7  
T: + c Full ms [33,00-700,00]

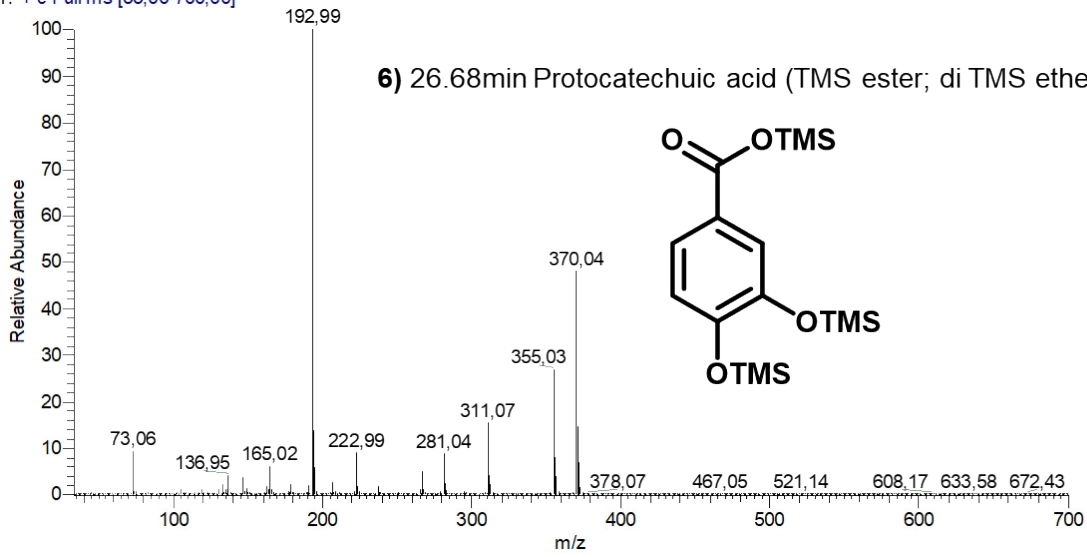

Karin03Sol #1277-1281 RT: 31.85-31.94 AV: 5 NL: 1,12E7  
T: + c Full ms [33,00-700,00]

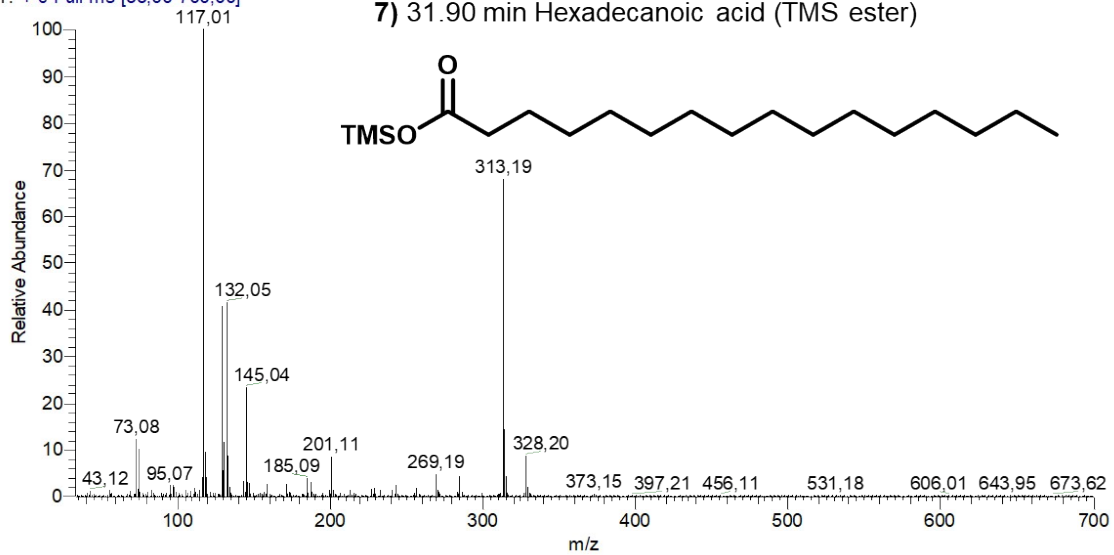

Karin03Sol #1306-1309 RT: 32.51-32.58 AV: 4 NL: 6,24E6  
T: + c Full ms [33,00-700,00]

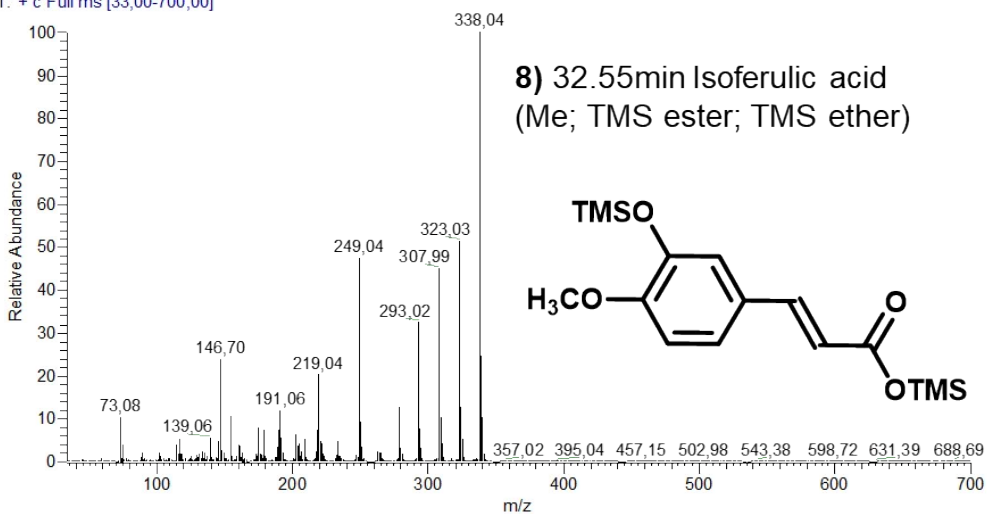

Klara03Sol #1675-1680 RT: 40,86-40,97 AV: 6 NL: 2,51E6  
T: + c Full ms [33,00-700,00]

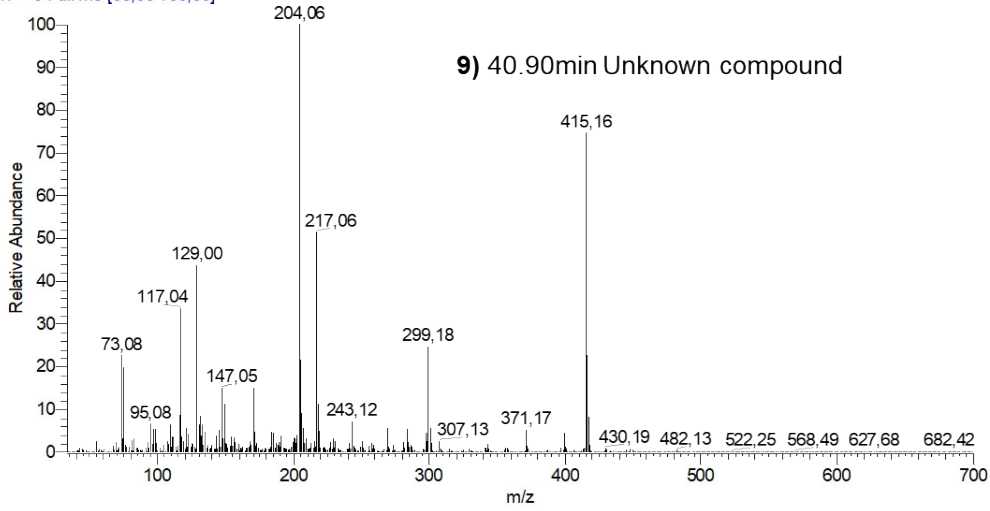

Klara03Sol #2025-2030 RT: 48,77-48,89 AV: 6 NL: 6,61E6  
T: + c Full ms [33,00-700,00]

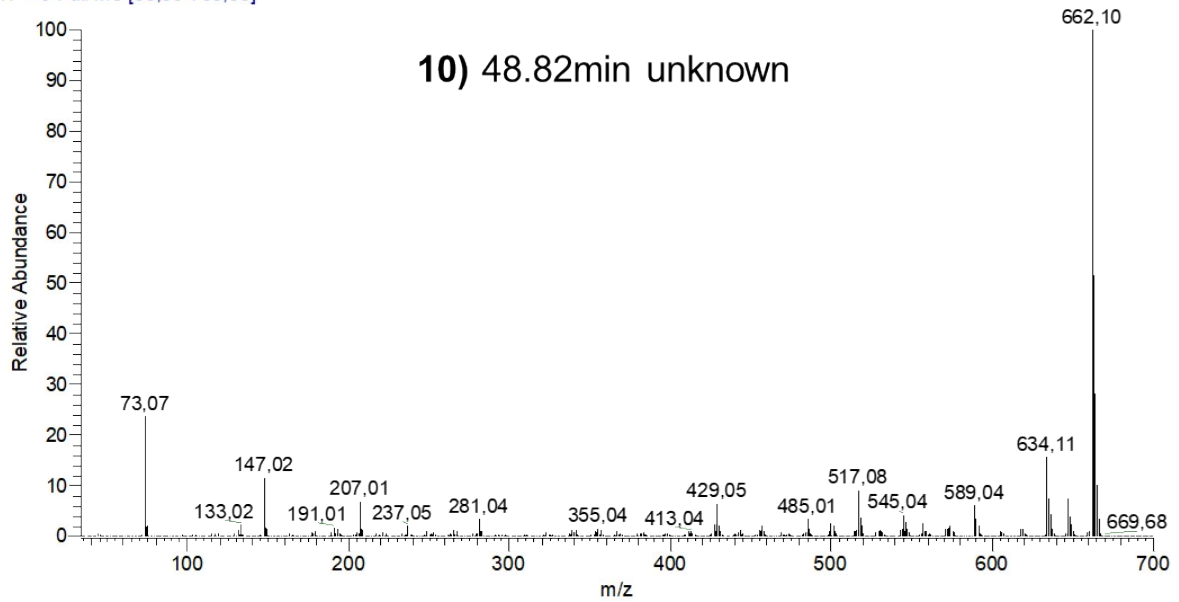

**Supplementary Fig. 10** Mass spectra of trimethylsilylated diethyl ether-soluble HTS detected from Karin and Klara bark.

**Supplementary Table 2. Main diethyl ether soluble HTS (supplementary Fig. 8) obtained from Karin/ Klara bark.** MS spectra were referenced with literature and publicly available databases [DB]: NIST Chemistry WebBook [N].

| Retention time, min                                           | Peak number | Compounds, detected as methyl ester (Me) and/or TMS ester/ether (TMS) derivatives | Characteristic fragments m/z               | MW of TMS derivatives | DB/ Reference                           |
|---------------------------------------------------------------|-------------|-----------------------------------------------------------------------------------|--------------------------------------------|-----------------------|-----------------------------------------|
| <b>Aromatic compound</b>                                      |             |                                                                                   |                                            |                       |                                         |
| 12.23                                                         | 3           | Catechol (di TMS ether)                                                           | 254; 239; 151; 136; 75; 73                 | 254                   | [N]                                     |
| 21.23                                                         | 4           | 4-Hydroxybenzoic acid (TMS ether; TMS ester)                                      | 282; 267; 223; 193; 126; 73                | 282                   | [N]                                     |
| 26.68                                                         | 6           | Protocatechuic acid (TMS ester; di TMS ether)                                     | 370; 355; 311; 281; 223; 193; 73           | 370                   | [N]                                     |
| 32.55                                                         | 8           | Isoferulic acid (Me; TMS ester; TMS ether)                                        | 338; 323; 308; 293; 249; 219; 191; 146; 73 | 338                   | [N]                                     |
| <b>Fatty acids</b>                                            |             |                                                                                   |                                            |                       |                                         |
| <i>Saturated fatty acids (Mono-carboxylic acid)</i>           |             |                                                                                   |                                            |                       |                                         |
| 31.90                                                         | 7           | Hexadecanoic acid (TMS ester)                                                     | 328; 313; 269; 145; 132; 117; 75; 73       | 328                   | [N]; [Branco et al. 2020] <sup>50</sup> |
| <i>Saturated fatty acids (alpha, omega-dicarboxylic acid)</i> |             |                                                                                   |                                            |                       |                                         |
| 25.87                                                         | 5           | Azelaic acid (di TMS ester)                                                       | 317; 217; 201; 171; 129; 117; 75; 73       | 332                   | [N]                                     |
| <b>2-Hydroxyacids (aliphatic)</b>                             |             |                                                                                   |                                            |                       |                                         |
| 5.15                                                          | 1           | Lactic acid (TMS ether; TMS ester)                                                | 219; 190; 147; 117; 75; 73                 | 234                   | [N]                                     |
| <b>unknown compound</b>                                       |             |                                                                                   |                                            |                       |                                         |
| 6.91                                                          | 2           | Unknown compound                                                                  | 233; 205; 147; 131; 75; 73                 | n.d.                  | n.d.                                    |
| 40.90                                                         | 9           | Unknown compound                                                                  | 415; 299; 217; 204; 129; 117; 73           | n.d.                  | n.d.                                    |
| 48.82                                                         | 10          | Unknown compound                                                                  | 662; 634; 147; 73                          | n.d.                  | n.d.                                    |

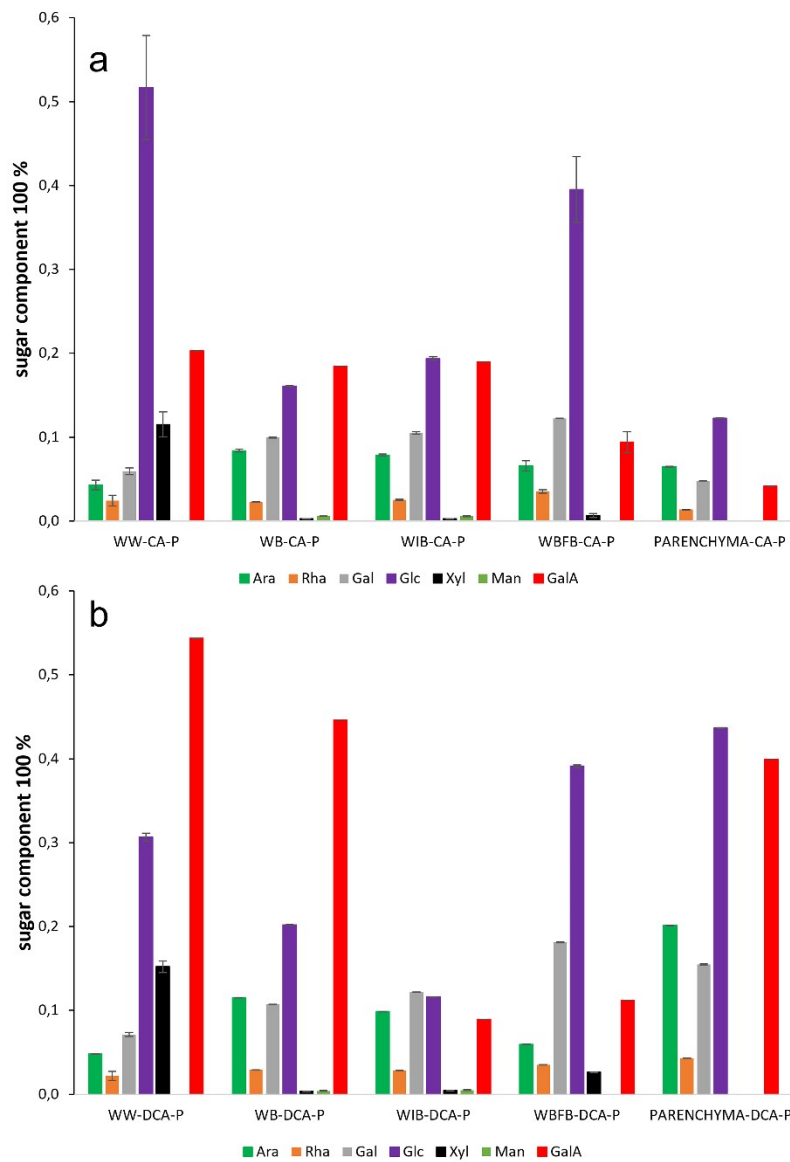

**Supplementary Fig. 11 Carbohydrate composition (% of anhydro sugars in the monosaccharide) from five different samples. a** Purified pectin (CAP). **b** Dialysis treated pectin (DCAP) that is collected through the scheme (Supplementary Fig. 6).



**Supplementary Table 3. Structural features of the ethanol precipitated pectin after dialysis (DCA-P) from five different samples: wood; bark; inner bark; fibre bundle; and parenchyma tissues.** The relative amount of linkage patterns of each neutral sugar was estimated from volume integrals of  $^1\text{H}$ - $^{13}\text{C}$  correlation contours (Fig. 2).

| linkages                         | abbreviation | WW-DCAP | WB-DCAP | WIB-DCAP | WBFB-DCAP | Parenchy-DCAP |
|----------------------------------|--------------|---------|---------|----------|-----------|---------------|
| Arabinose Interunit Linkages (%) |              |         |         |          |           |               |
| →5)-a-Araf-(1→                   | A1,5         | 61      | 98      | 82       | 90        | 78            |
| →2,3,5)-a-Araf-(1→               | A2,3,5       | 0       | 2       | 7        | 0         | 13            |
| →2,5)-a-Araf-(1→                 | A2,5         | 17      | 0       | 11       | 10        | 9             |
| β-Araf-(1→                       | A1           | 22      | 0       | 0        | 0         | 0             |
| Rhamnose Interunit Linkages (%)  |              |         |         |          |           |               |
| →2)-a-Rhap-(1→                   | R1,2         | n.d.    | 50      | 57       | n.d.      | n.d.          |
| →2,4)-a-Rhap-(1→                 | R1,2,4       | n.d.    | 50      | 43       | n.d.      | n.d.          |
| Galactose Interunit Linkages (%) |              |         |         |          |           |               |
| β-Galp-(1→                       | Ga           | 13      | 21      | 6        | 16        | 0             |
| →4)-β-Galp-(1→                   | Ga1,4        | 87      | 79      | 94       | 84        | 100           |

**Supplementary Table 4. Chemical shift assignments for dialyzed citric acid extracted pectin (DCA-P) (Supplementary Fig. 6) of willow wood (WW) and bark (WB; WIB; WBFB; and Parenchyma), referenced to TSP-d4 ( $\delta\text{C}/\delta\text{H}$ , 0/ 0 ppm).**

| Residue               | Label <sup>1</sup> | C-1<br><i>H-1</i> | C-2<br><i>H-2</i> | C-3<br><i>H-3</i> | C-4<br><i>H-4</i> | C-5<br><i>H-5;5'</i>     | C-6<br><i>H-6;6'</i> | $\text{CH}_3\text{CO}$ | $\text{CH}_3\text{CO}$ | $\text{CH}_3\text{O}$ |
|-----------------------|--------------------|-------------------|-------------------|-------------------|-------------------|--------------------------|----------------------|------------------------|------------------------|-----------------------|
| →4)-α-GalpA-6-OMe-(1→ | GalpA<br>(OMe)     | 102.9             | 70.8              | 71.6              | 82.1              | 73.5                     |                      |                        |                        | 55.8                  |
|                       |                    | 5.4               | 3.7               | 4.11              | 4.31              | 5.1                      |                      |                        |                        | 3.81                  |
| →4)-α-GalpA-3-OAc-(1→ | GalpA<br>(OAc)     | 102.9             | 71.6              | 73.7              | <i>n.d.</i>       | 73.5                     |                      | 23.5                   |                        |                       |
|                       |                    | 5.4               | 4.11              | 5.14              | <i>n.d.</i>       | 5.1                      |                      | 2.19                   |                        |                       |
| →3, 4)-α-GalpA-(1→    | GalpA1,3,4         | 101.5             | <i>n.d.</i>       | <i>n.d.</i>       | <i>n.d.</i>       | <i>n.d.</i>              |                      |                        |                        |                       |
|                       |                    | 5.08              | <i>n.d.</i>       | <i>n.d.</i>       | <i>n.d.</i>       | <i>n.d.</i>              |                      |                        |                        |                       |
| →4)-α-GalpA-(1→       | GalpA              | 102.9             | 69.3              | 69.7              | 83.2              | 74.2                     |                      |                        |                        |                       |
|                       |                    | 5.4               | 3.83              | 3.9               | 4.27              | 4.73                     |                      |                        |                        |                       |
| →5)-α-Araf-(1→        | A <sub>1,5</sub>   | 110.6             | 84.2              | 79.5              | 85.4              | 69.4                     |                      |                        |                        |                       |
|                       |                    | 5.09              | 4.15              | 3.98              | 4.22              | 3.81                     |                      |                        |                        |                       |
| →3)-α-Araf-(1→        | A <sub>1,3</sub>   | 109.4             | 84.2              | 87                | 84.5              | 64.1                     |                      |                        |                        |                       |
|                       |                    | 5.26              | 4.31              | 4.07              | 4.23              | 3.84;3.73                |                      |                        |                        |                       |
| →2,3,5)-α-Araf-(1→    | A <sub>2,3,5</sub> | 110.1             | 87.96             | 83.3              | 85.2              | 69.2                     |                      |                        |                        |                       |
|                       |                    | 5.18              | 4.32              | 4.26              | 4.3               | 3.95                     |                      |                        |                        |                       |
| →2,5)-α-Araf-(1→      | A <sub>2,5</sub>   | 110.1             | 89.6              | <i>n.d.</i>       | <i>n.d.</i>       | <i>n.d.</i>              |                      |                        |                        |                       |
|                       |                    | 5.18              | 4.17              | <i>n.d.</i>       | <i>n.d.</i>       | <i>n.d.</i>              |                      |                        |                        |                       |
| β-Araf-(1→            | A <sub>1-β</sub>   | 102.7             | 79.7              | 76.5              | 85.2              | 65.5                     |                      |                        |                        |                       |
|                       |                    | 5.42              | 4.03              | 3.98              | 3.91              | 3.82                     |                      |                        |                        |                       |
| α-Araf-(1→            | A <sub>1-α</sub>   | 112.3             | 79.7              | 76.5              | 85.2              | 65.5                     |                      |                        |                        |                       |
|                       |                    | 5.25              | 4.03              | 3.98              | 3.91              | 3.82                     |                      |                        |                        |                       |
| →2)-a-Rhap-(1→        | R1,2               | 112.2             | 78.3              | 69.7              | 73.4              | 72.9                     | 19.6                 |                        |                        |                       |
|                       |                    | 5.26              | 4.18              | 3.89              | 3.43              | 3.67                     | 1.26                 |                        |                        |                       |
| →2,4)-a-Rhap-(1→      | R1,2,4             | 112.2             | 78.3              | 72.7              | 84                | 69.9                     | 19.6                 |                        |                        |                       |
|                       |                    | 5.26              | 4.18              | 4.06              | 3.79              | 3.87                     | 1.26                 |                        |                        |                       |
| β-Galp-(1→            | Ga                 | 106.1             | 74.7              | 75                | <i>n.d.</i>       | 77.6                     | 63.6                 |                        |                        |                       |
|                       |                    | 4.52              | 3.53              | 3.65              | <i>n.d.</i>       | 3.72                     | 3.84                 |                        |                        |                       |
| →4)-β-Galp-(1→        | Gal,4              | 107.4             | 75.9              | 76.4              | 80.7              | 79.8                     | 63.7                 |                        |                        |                       |
|                       |                    | 4.65              | 3.69              | 3.78              | 4.17              | 3.67                     | 3.83                 |                        |                        |                       |
| →4)-α-D-Glcp-(1→      | St1,4              | 102.5             | 74.5              | 76.5              | 79.7              | 74.2                     | 63.7                 |                        |                        |                       |
|                       |                    | 5.41              | 3.64              | 3.98              | 3.66              | 3.84                     | 3.83                 |                        |                        |                       |
| α-Xyl-(1→             | X                  | 101.5             | 71.6              | 79.4              | 70.1              | 63.1 (5a); 5b<br>overlap |                      |                        |                        |                       |
|                       |                    | 5.08              | 3.82              | 3.84              | 4.34              | 3.46 (5a); 5b<br>overlap |                      |                        |                        |                       |

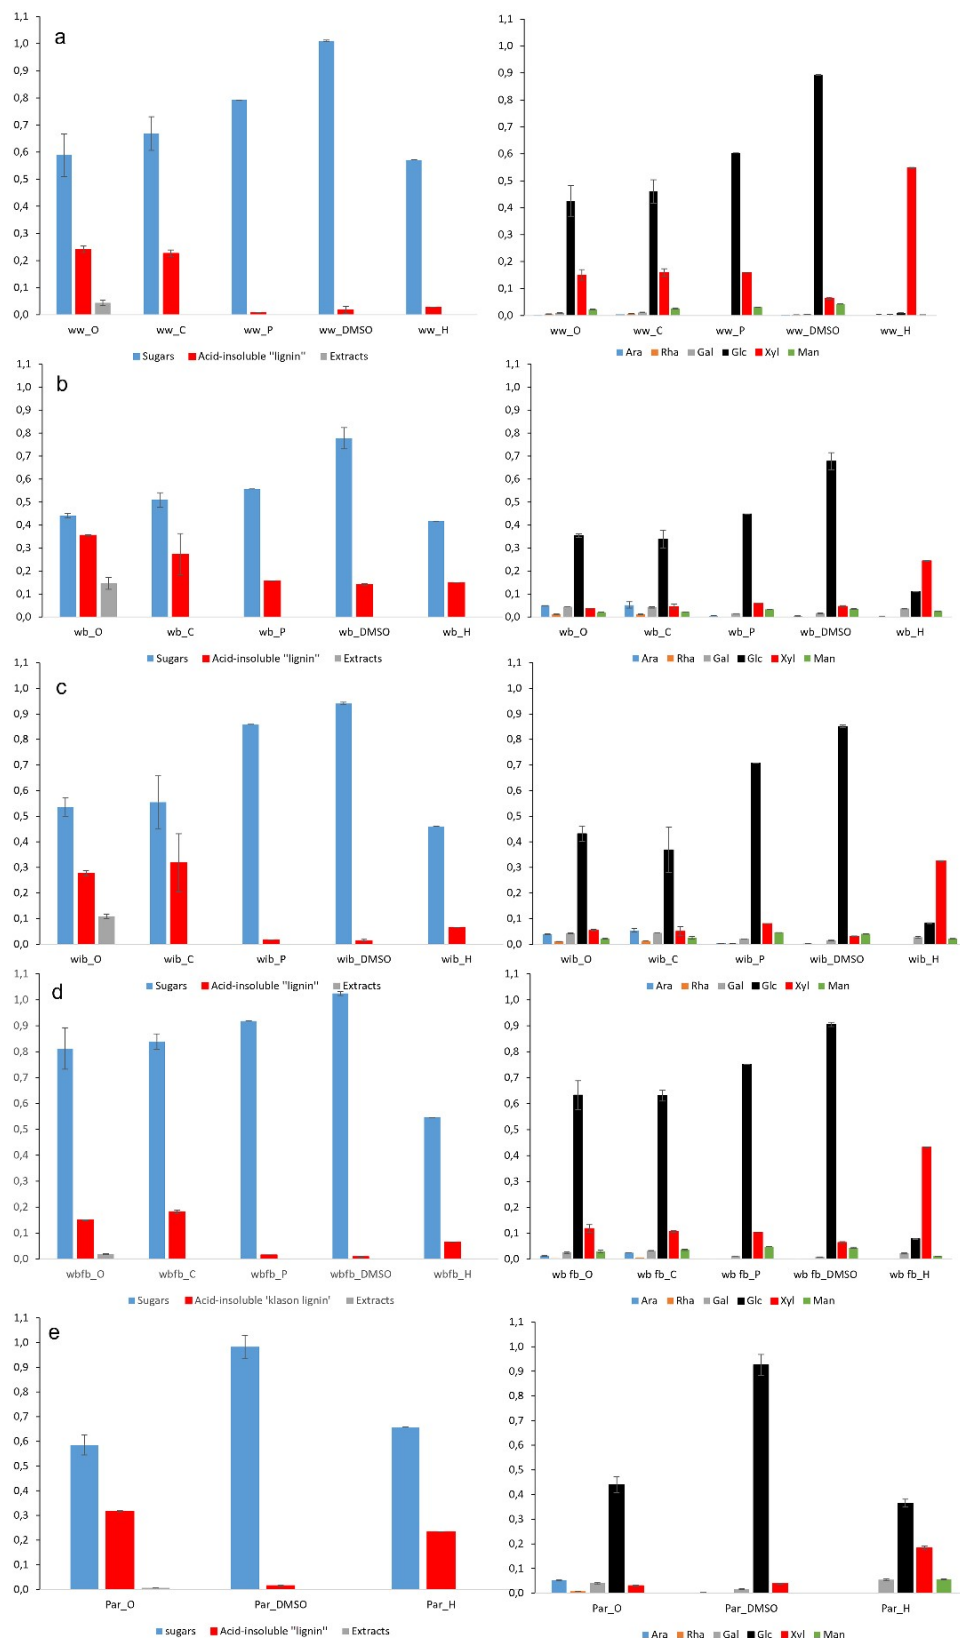

**Supplementary Fig. 12 Overall chemical composition (% of the dry mass) (left) and carbohydrate composition (% of anhydro sugars in the monosaccharide) (right) from five different samples. a** Willow wood. **b** Willow bark. **c** Willow inner bark. **d** Willow bark fibre bundle. **e** Parenchyma tissues that are collected from their original form (O), solid residues after the citric acid treatment (C), solid residues after the peracetic acid delignification (P), solid residues after the DMSO extraction (DMSO), and the recovered hemicellulose (H). (Supplementary Fig. 6)

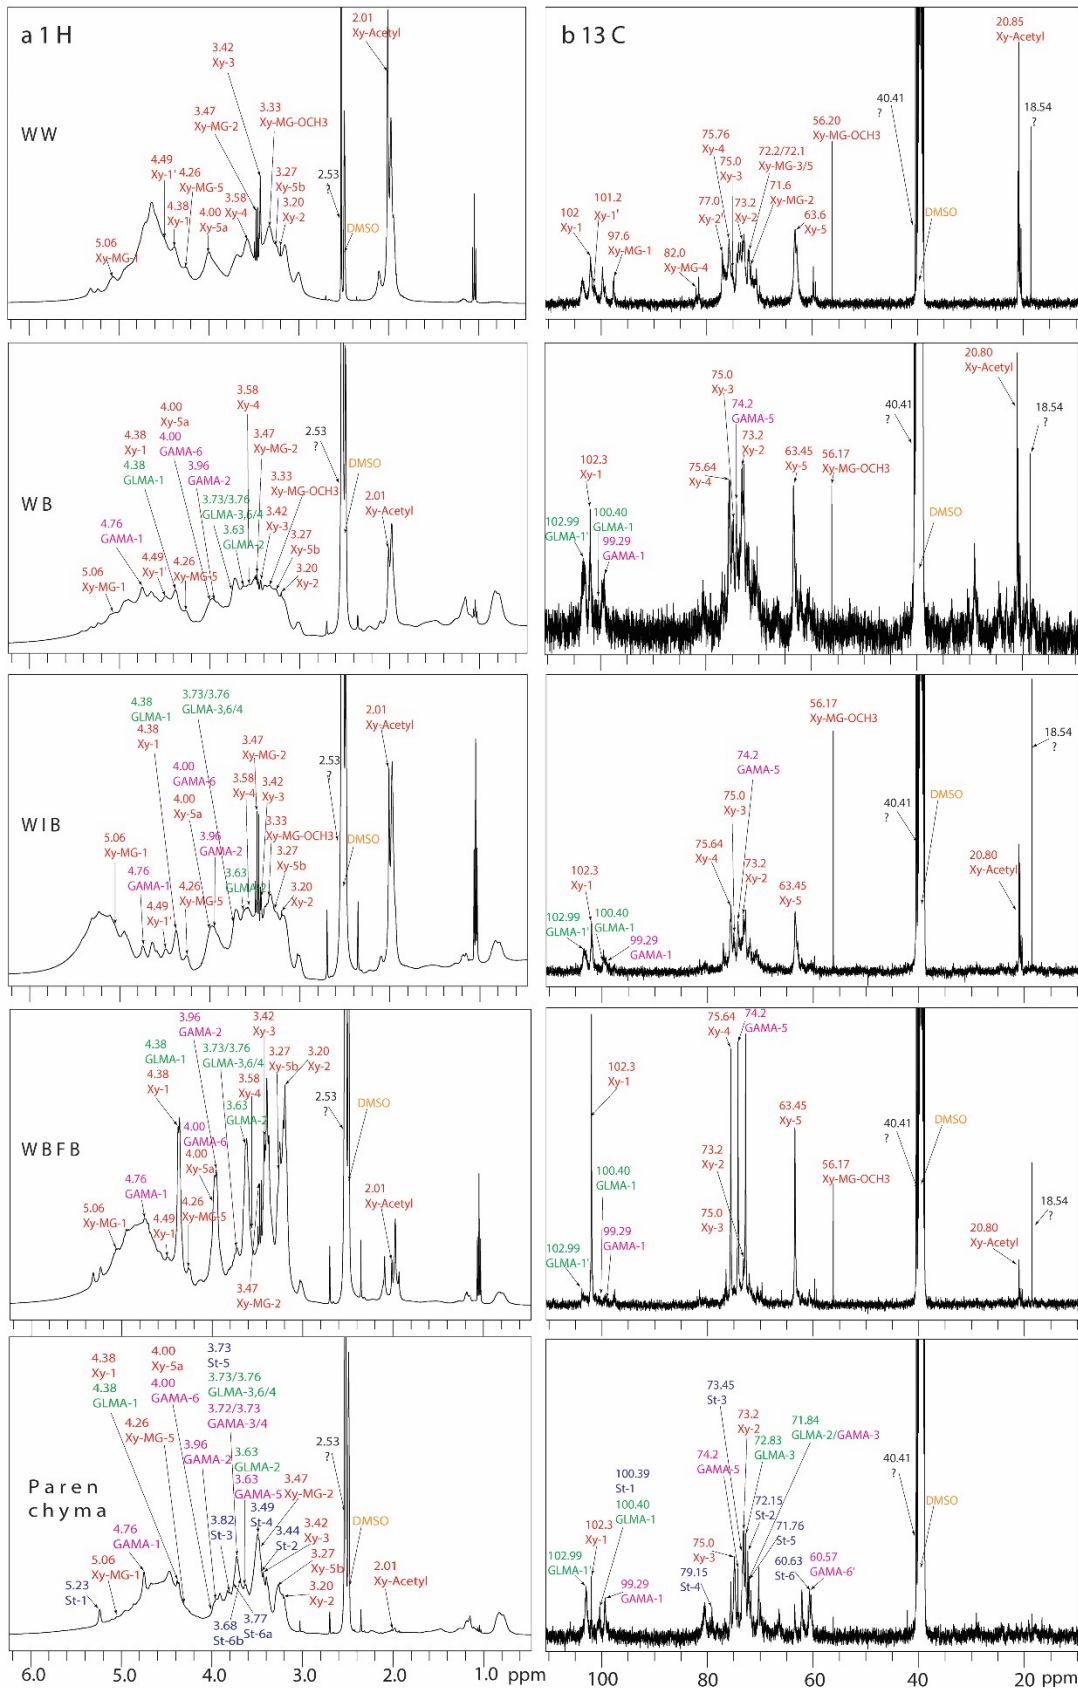

**Supplementary Fig. 13** NMR spectrum of the purified hemicellulose from wood (WW); bark (WB); inner bark (WIB); fiber bundle (WB FB) and parenchyma tissues (Parenchyma). **a**  $^1\text{H}$ . **b**  $^{13}\text{C}$ . For full spectrum of the  $^{13}\text{C}$  spectra, see **Supplementary Fig. 15**. For assignments, see **Supplementary Table 5–6**.

**Supplementary Table 5. Assignments of the <sup>1</sup>H NMR spectra of willow hemicelluloses (WW; WB; WIB; WBFB; Parenchyma) in comparison to the literatures<sup>9, 34</sup> and authentic starch.**

|                                      | abbreviation | WW   | WB   | WIB  | WBFB | parenchyma | Yuan et al. 2010 <sup>34</sup> | Sun et al. 2013 <sup>9</sup> | authentic starch |
|--------------------------------------|--------------|------|------|------|------|------------|--------------------------------|------------------------------|------------------|
| (1-4)-β-D-Xylp (1)                   | Xy-1         | 4.38 | 4.38 | 4.38 | 4.38 | 4.38       | 4.41                           | 4.28                         |                  |
| (1-4)-β-D-Xylp (5b)                  | Xy-5b        | 4.00 | 4.00 | 4.00 | 4.00 | 4.00       | 4.04                           | 3.92                         |                  |
| (1-4)-β-D-Xylp (4)                   | Xy-4         | 3.58 | 3.58 | 3.58 | 3.58 | —          | 3.72                           | 3.61                         |                  |
| (1-4)-β-D-Xylp (3)                   | Xy-3         | 3.42 | 3.42 | 3.42 | 3.42 | 3.42       | 3.50                           | 3.34                         |                  |
| (1-4)-β-D-Xylp (5a)                  | Xy-5a        | 3.27 | 3.27 | 3.27 | 3.27 | 3.27       | 3.32                           | 3.22                         |                  |
| (1-4)-β-D-Xylp (2)                   | Xy-2         | 3.20 | 3.20 | 3.20 | 3.20 | 3.20       | 3.23                           | 3.13                         |                  |
| 4-O-Me-α-D-Glucuronic acid (C1H1)    | Xy-MG-1      | 5.06 | 5.06 | 5.06 | 5.06 | 5.06       | 5.22                           | 5.13                         |                  |
| 4-O-Me-α-D-Glucuronic acid (C5H5)    | Xy-MG-5      | 4.26 | 4.26 | 4.26 | 4.26 | 4.26       | —                              | 4.15                         |                  |
| 4-O-Me-α-D-Glucuronic acid (C2H2)    | Xy-MG-2      | 3.47 | 3.47 | 3.47 | 3.47 | 3.47       | —                              | 3.49                         |                  |
| methoxy group                        | Xy-MG-OCH3   | 3.33 | 3.33 | 3.33 | —    | —          | 3.40                           | 3.34                         |                  |
| acetyl CH3 (-C=O CH3)                | Xy-Acetyl    | 2.01 | 2.01 | 2.01 | 2.01 | 2.01       | —                              | —                            |                  |
| (1-4)-β-D-Xylp-1-O-(4-OMe-α-D-GlcpA) | Xy-1'        | 4.49 | 4.49 | 4.49 | 4.49 | —          | 4.58                           | —                            |                  |
| Starch (1)                           | St-1         |      |      |      |      | 5.23       |                                |                              | 5.228            |
| Starch (2)                           | St-2         |      |      |      |      | 3.44       |                                |                              | 3.44             |
| Starch (3)                           | St-3         |      |      |      |      | 3.82       |                                |                              | 3.82             |
| Starch (4)                           | St-4         |      |      |      |      | 3.49       |                                |                              | 3.49             |
| Starch (5)                           | St-5         |      |      |      |      | 3.73       |                                |                              | 3.73             |
| Starch (6a)                          | St-6a        |      |      |      |      | 3.77       |                                |                              | 3.77             |
| Starch (6b)                          | St-6b        |      |      |      |      | 3.68       |                                |                              | 3.68             |

**Supplementary Table 6. Assignments of the <sup>13</sup>C NMR spectra of willow hemicelluloses (WW; WB; WIB; WBF; Parenchyma) in comparison to the literatures<sup>9,34,39,38</sup> and authentic starch.**

|                                                                | abbreviation     | WW     | WB     | WIB    | WBF    | parenchyma | Yuan et al. 2010 <sup>34</sup> | Sun et al. 2014 <sup>9</sup> | Nobre et al. 2018 <sup>39</sup> | Nishimura et al. 2018 <sup>38</sup> | authentic starch |
|----------------------------------------------------------------|------------------|--------|--------|--------|--------|------------|--------------------------------|------------------------------|---------------------------------|-------------------------------------|------------------|
| 4-O-Me- $\alpha$ -D-Glucuronic acid(C6H6) GlcpA                | Xy-MG-6          | 169.30 | 169.30 | 169.30 | 169.30 | -          | 173.4                          | 177.1                        | -                               | -                                   |                  |
| (1-4)- $\beta$ -D-Glcp (C1H1) or glucomannan C1'/H1' (glucose) | GLMA-1'          | -      | 102.99 | 102.99 | 102.99 | 102.99     | -                              | -                            | -                               | 103.1                               |                  |
| (1-4)- $\beta$ -D-Xylp (C1H1)                                  | Xy-1             | 102.00 | 102.00 | 102.00 | 102.00 | 102.00     | 101.73                         | 102                          | -                               | -                                   |                  |
| glucomannan (1) (mannose branch side)                          | GLMA-1           | -      | 100.40 | 100.40 | 100.40 | 100.40     | -                              | -                            | -                               | 100.6                               |                  |
| (1-4)- $\beta$ -D-Xylp (C1'H1')                                | Xy-1'            | 101.20 | -      | -      | 101.20 | 101.20     | -                              | -                            | -                               | -                                   |                  |
| galactomannan (1)                                              | GAMA-1           | -      | 99.29  | 99.29  | 99.29  | 99.29      | -                              | -                            | 100.62                          | -                                   |                  |
| 4-O-Me- $\alpha$ -D-Glucuronic acid (C1H1) GlcpA               | Xy-MG-1          | 97.60  | -      | -      | -      | -          | 97.6                           | 97.5                         | -                               | -                                   |                  |
| 4-O-Me- $\alpha$ -D-Glucuronic acid (C4H4) GlcpA               | Xy-MG-4          | 82.00  | -      | -      | -      | -          | 82.49                          | 82.7                         | -                               | -                                   |                  |
| (1-4)- $\beta$ -D-Xylp (C2'H2')                                | Xy-2'            | 77.00  | 77.00  | 77.00  | 77.00  | 77.00      | -                              | -                            | -                               | -                                   |                  |
| (1-4)- $\beta$ -D-Xylp (4)                                     | Xy-4             | 75.76  | 75.76  | 75.76  | 75.76  | 75.76      | 76.42                          | 76.0                         | -                               | -                                   |                  |
| (1-4)- $\beta$ -D-Xylp (3)                                     | Xy-3             | 75.00  | 75.00  | 75.00  | 75.00  | 75.00      | 73.73                          | 74.9                         | -                               | -                                   |                  |
| galactomannan (5)                                              | GAMA-5           | -      | 74.20  | 74.20  | 74.20  | 74.20      | -                              | -                            | 74.05                           | -                                   |                  |
| (1-4)- $\beta$ -D-Xylp (2)                                     | Xy-2             | 73.20  | 73.20  | 73.20  | 73.20  | 73.20      | 72.76                          | 73.3                         | -                               | -                                   |                  |
| glucomannan (3)                                                | GLMA-3           | -      | -      | -      | -      | 72.83      | -                              | -                            | -                               | 71.0                                |                  |
| 4-O-Me- $\alpha$ -D-Glucuronic acid (C3H3) GlcpA               | Xy-MG-3          | 72.20  | 72.20  | 72.20  | 72.20  | -          | -                              | -                            | -                               | -                                   |                  |
| 4-O-Me- $\alpha$ -D-Glucuronic acid (C5H5) GlcpA               | Xy-MG-5          | 72.10  | 72.10  | 72.10  | 72.10  | -          | 72.27                          | 72.2                         | -                               | -                                   |                  |
| glucomannan (2)                                                | GLMA-2 or GAMA-3 | -      | -      | -      | -      | 71.84      | -                              | -                            | -                               | 70.5                                |                  |
| 4-O-Me- $\alpha$ -D-Glucuronic acid (C2H2) GlcpA               | Xy-MG-2          | 71.60  | 71.60  | 71.60  | 71.60  | -          | 71.33                          | -                            | -                               | -                                   |                  |
| (1-4)- $\beta$ -D-Xylp (5)                                     | Xy-5             | 63.60  | 63.60  | 63.45  | 63.45  | 63.60      | 63.02                          | 63.4                         | -                               | -                                   |                  |
| branched galactose of GAMA (6)                                 | GAMA-6'          | -      | -      | -      | -      | 60.57      | -                              | -                            | 61.80                           | -                                   |                  |
| 4-O-Me- $\alpha$ -D-Glucuronic acid (methoxyl) GlcpA           | Xy-MG-OCH3       | 56.20  | 56.20  | 56.17  | 56.17  | 56.20      | -                              | -                            | -                               | -                                   |                  |
| unknown                                                        | unknown          | 40.41  | 40.41  | 40.41  | 40.41  | 40.41      | -                              | -                            | -                               | -                                   |                  |
| acetyl CH3                                                     | Xy-Acetyl        | 20.85  | 20.83  | 20.83  | 20.83  | -          | -                              | -                            | -                               | -                                   |                  |
| unknown                                                        | unknown          | 18.54  | 18.54  | 18.54  | 18.54  | -          | -                              | -                            | -                               | -                                   |                  |
| Starch (1)                                                     | St-1             |        |        |        |        | 100.39     |                                |                              |                                 |                                     | 100.40           |
| Starch (2)                                                     | St-2             |        |        |        |        | 72.15      |                                |                              |                                 |                                     | 72.13            |
| Starch (3)                                                     | St-3             |        |        |        |        | 73.45      |                                |                              |                                 |                                     | 73.45            |
| Starch (4)                                                     | St-4             |        |        |        |        | 79.15      |                                |                              |                                 |                                     | 79.16            |
| Starch (5)                                                     | St-5             |        |        |        |        | 71.76      |                                |                              |                                 |                                     | 71.80            |
| Starch (6)                                                     | St-6             |        |        |        |        | 60.63      |                                |                              |                                 |                                     | 60.62            |

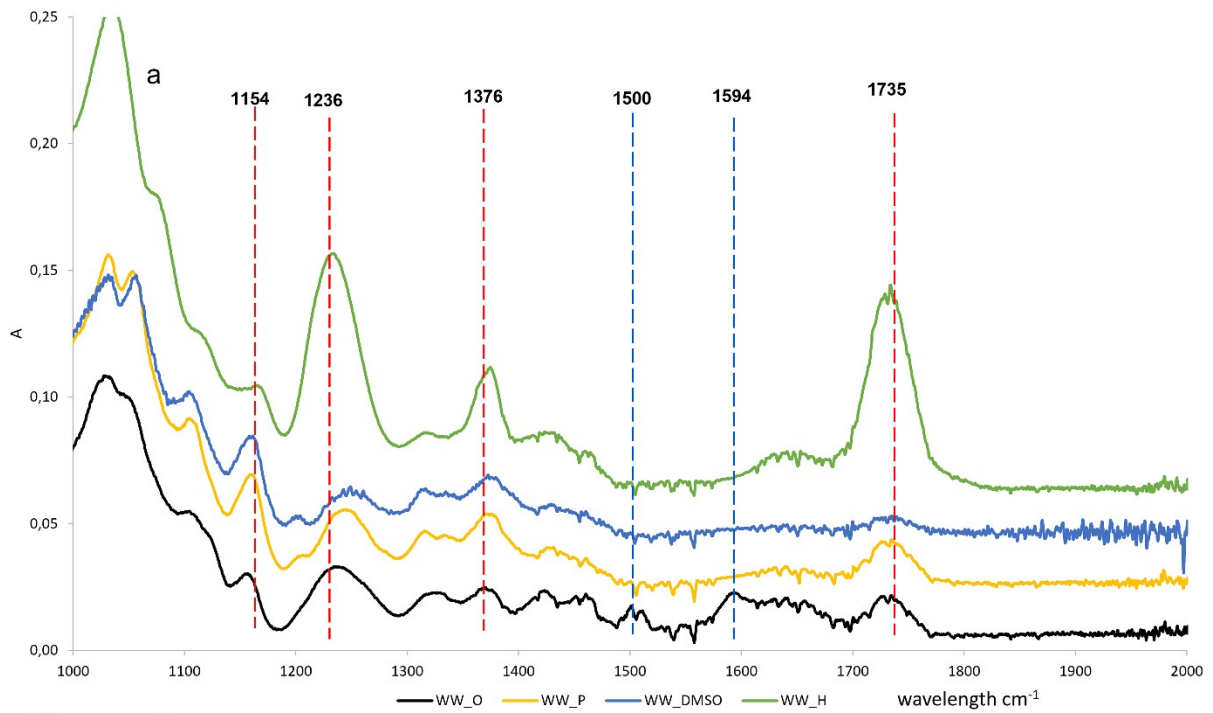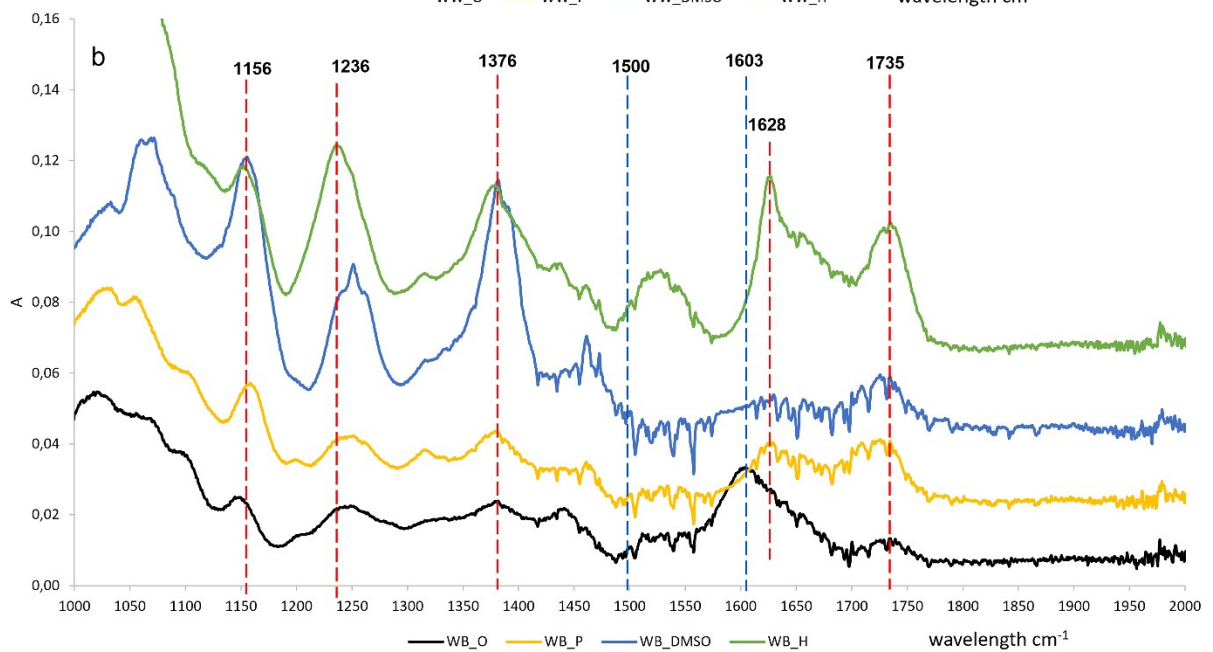

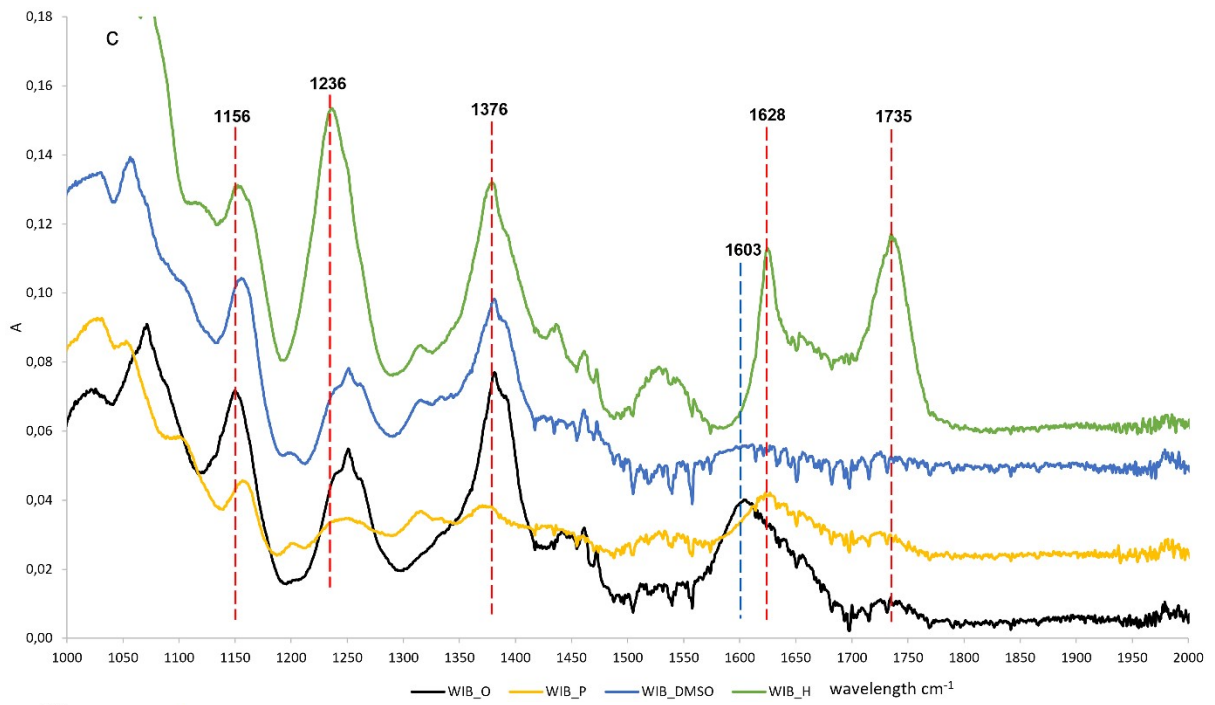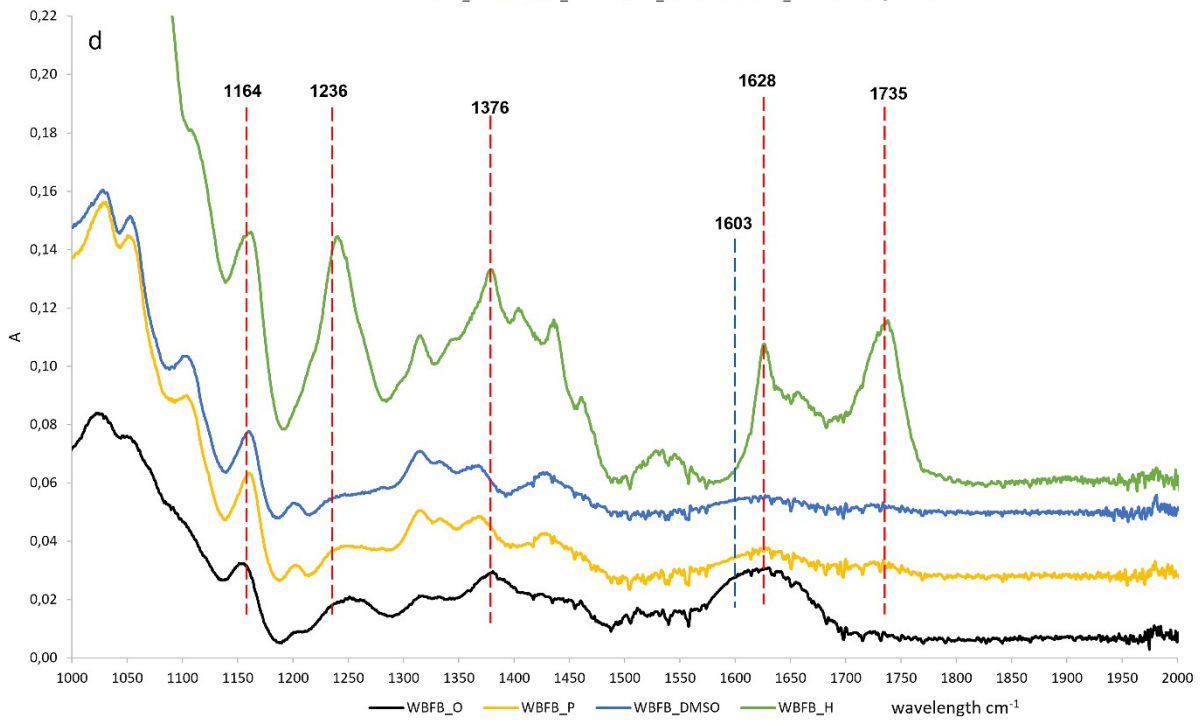



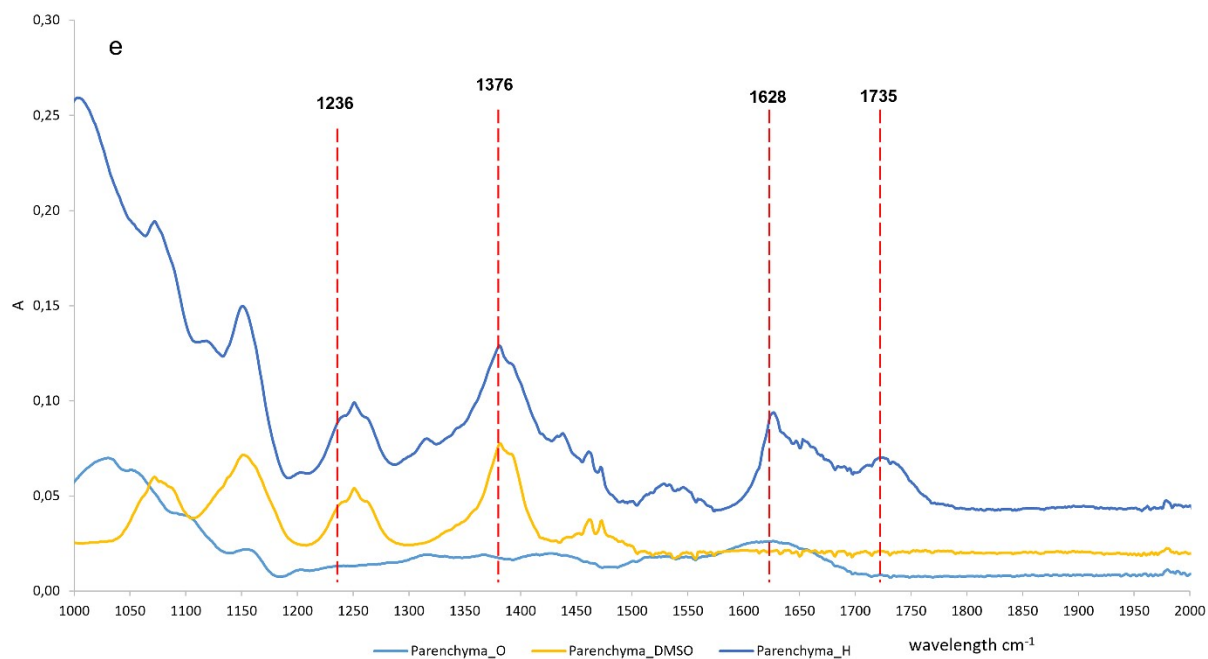

**Supplementary Fig. 14 FT-IR spectrum of five different samples. a** Willow wood. **b** Willow bark. **c** Willow inner bark. **d** Willow bark fibre bundle. **e** Parenchyma tissues that are collected from their original form (O), solid residues after peracetic acid delignification (P), solid residues after the DMSO extraction (DMSO), and the recovered hemicellulose (H). The assignment of FT-IR spectrum is summarized at **Supplementary Table 7**.

**Supplementary Table 7. The main functional group assignment of recovered hemicellulose fractions from willow wood and bark in FT-IR spectra based on the literature<sup>12</sup>.**

| wave numbers (cm <sup>-1</sup> ) | functional group                                                             | compounds                                                        |
|----------------------------------|------------------------------------------------------------------------------|------------------------------------------------------------------|
| 1154; 1156;<br>1164              | -C-O-C fragment                                                              | arabinosyl side branches, pyranose ring skeletal (hemicellulose) |
| 1236                             | - COOH vibration stretching of glucuronic acid (Xy-MG)                       | glucuronic acid (hemicellulose)                                  |
| 1376                             | C-CH <sub>3</sub> stretching; C-H vibration of polysaccharides               | cellulose                                                        |
| 1500                             | lignin aromatics                                                             | lignin                                                           |
| 1594 or 1603                     | lignin aromatics                                                             | lignin                                                           |
| 1628                             | C=O stretching carboxylation or from the contribution of protein amide group | protein                                                          |
| 1735                             | C=O stretching of hemicellulose                                              | hemicellulose                                                    |

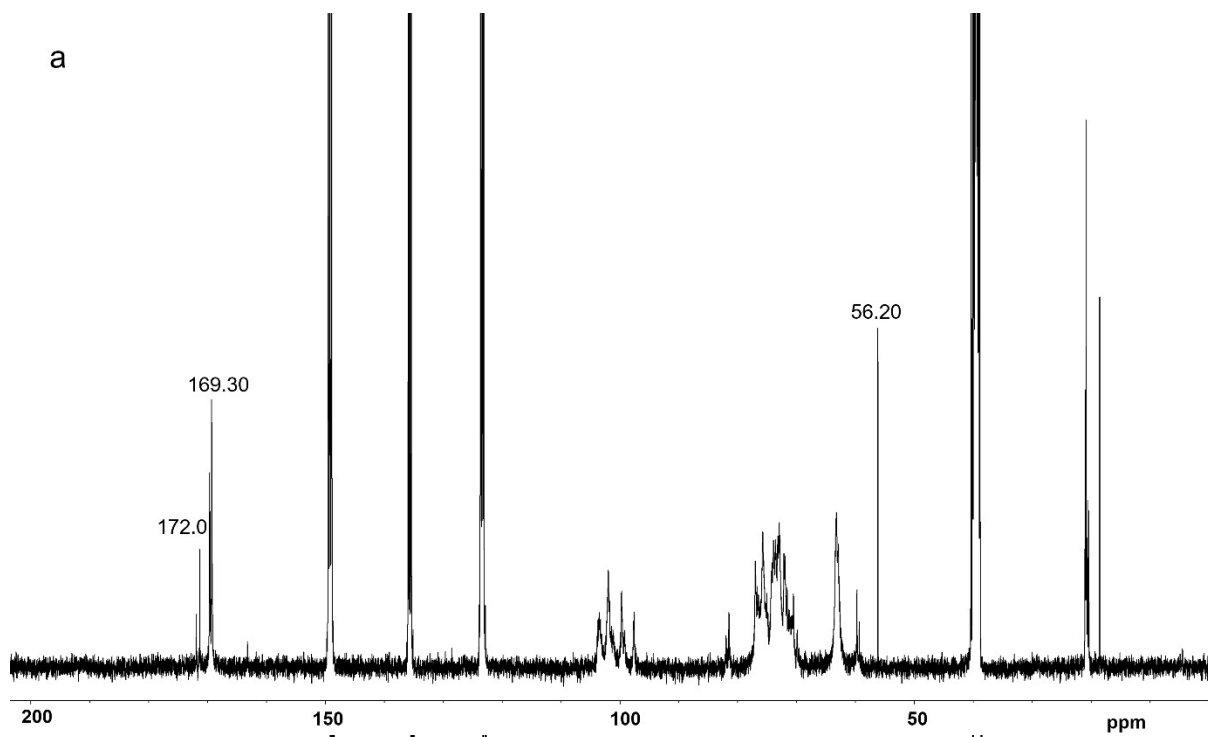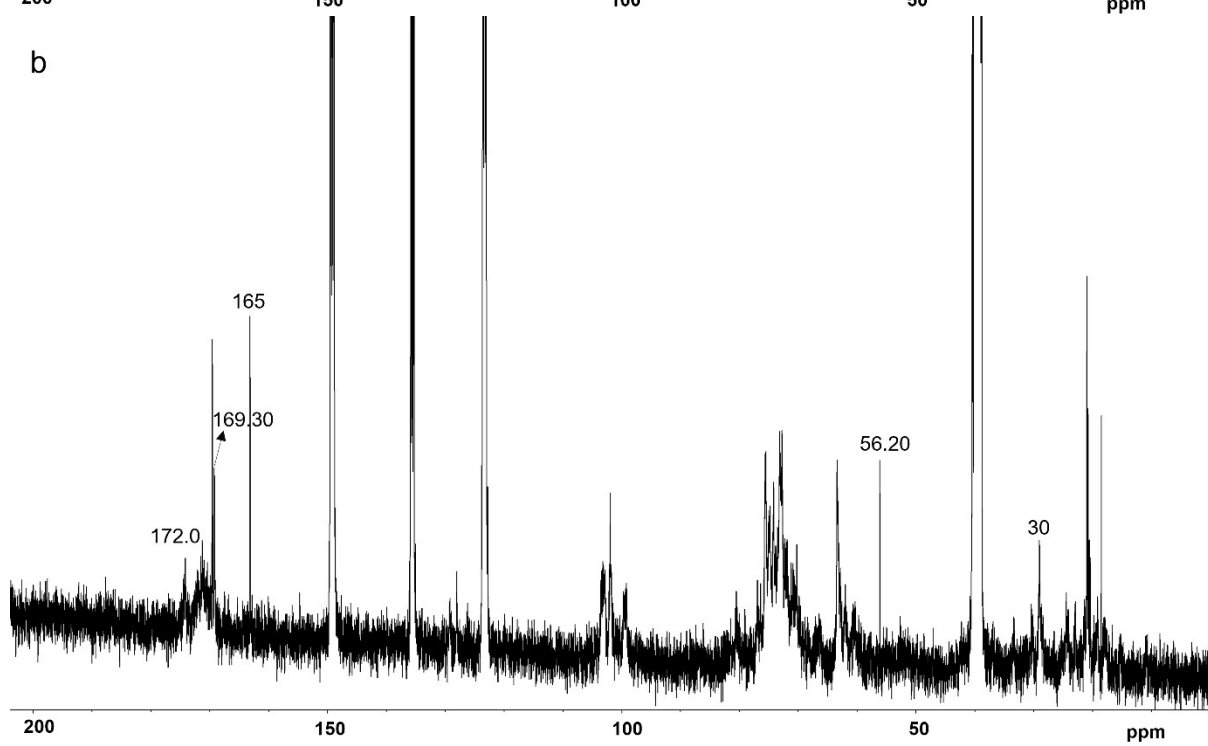

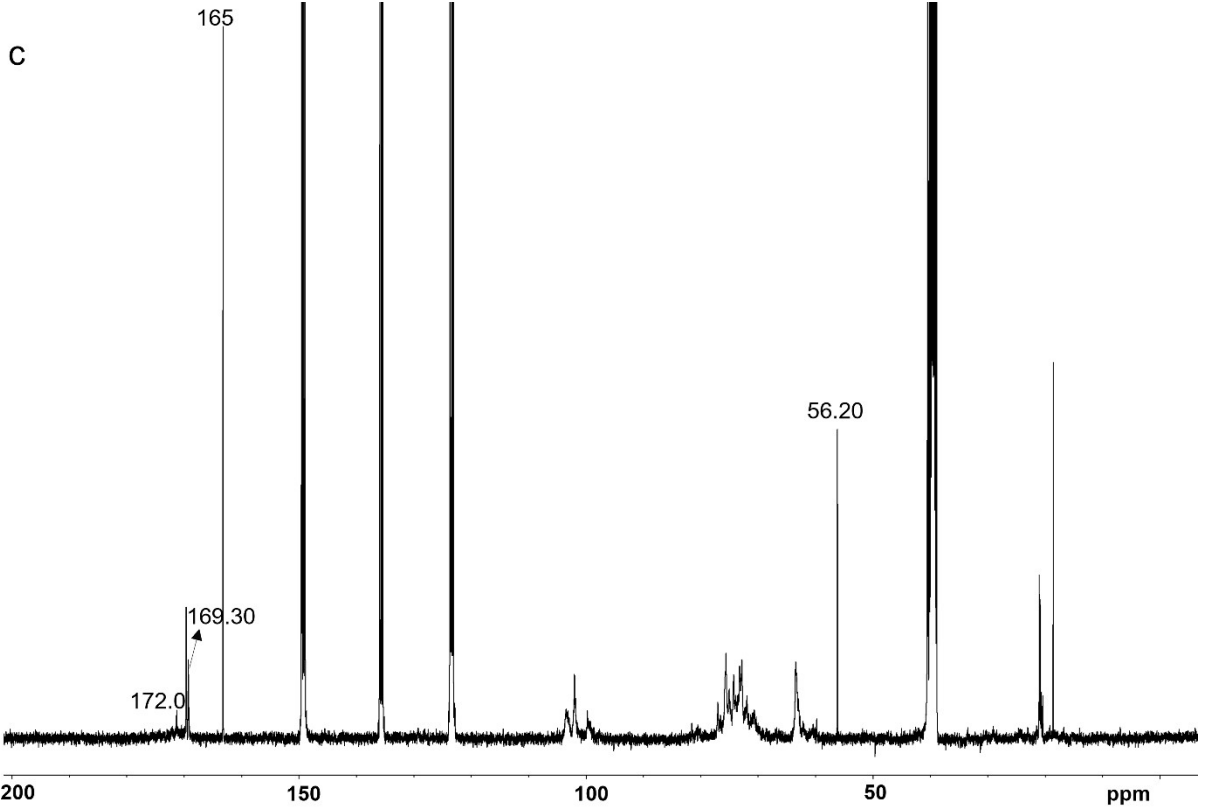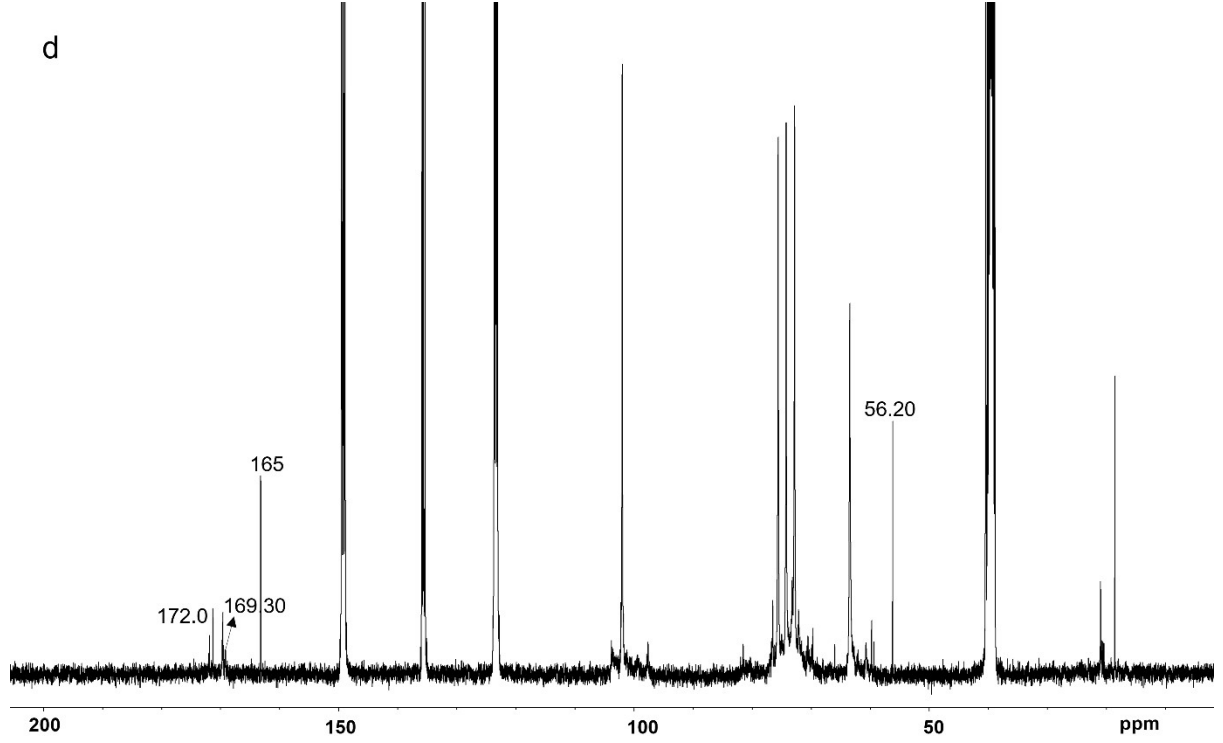

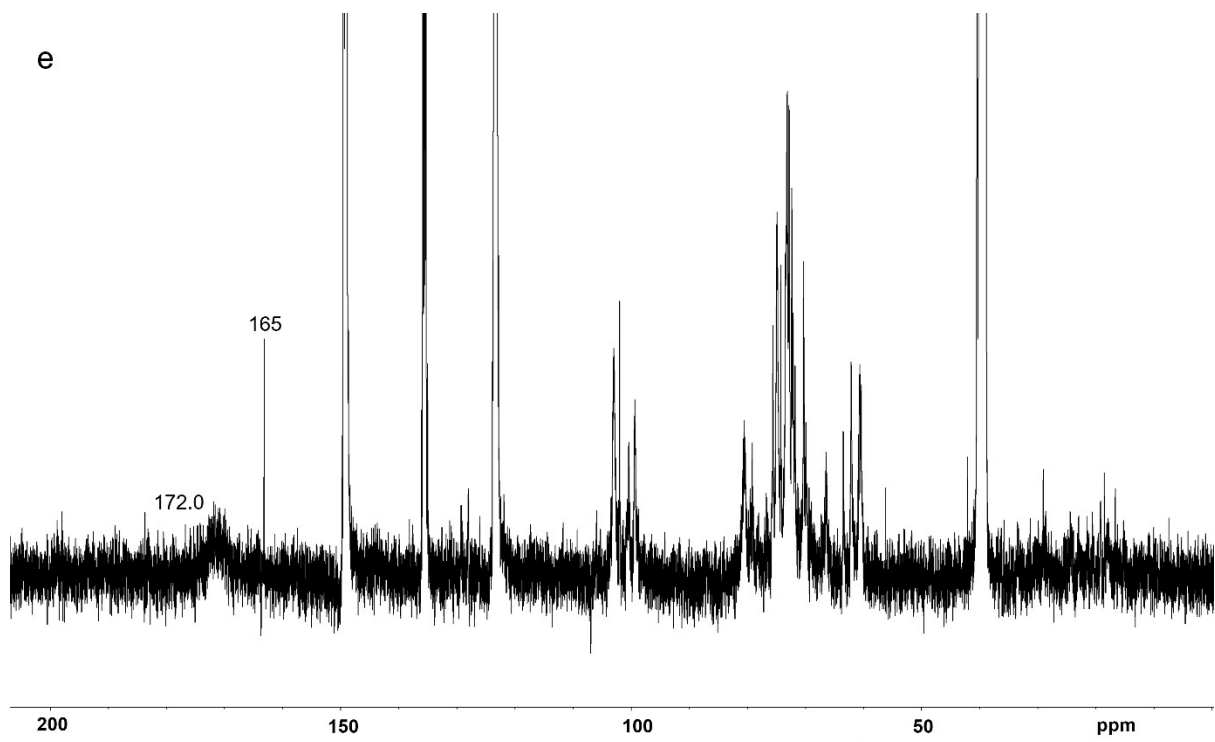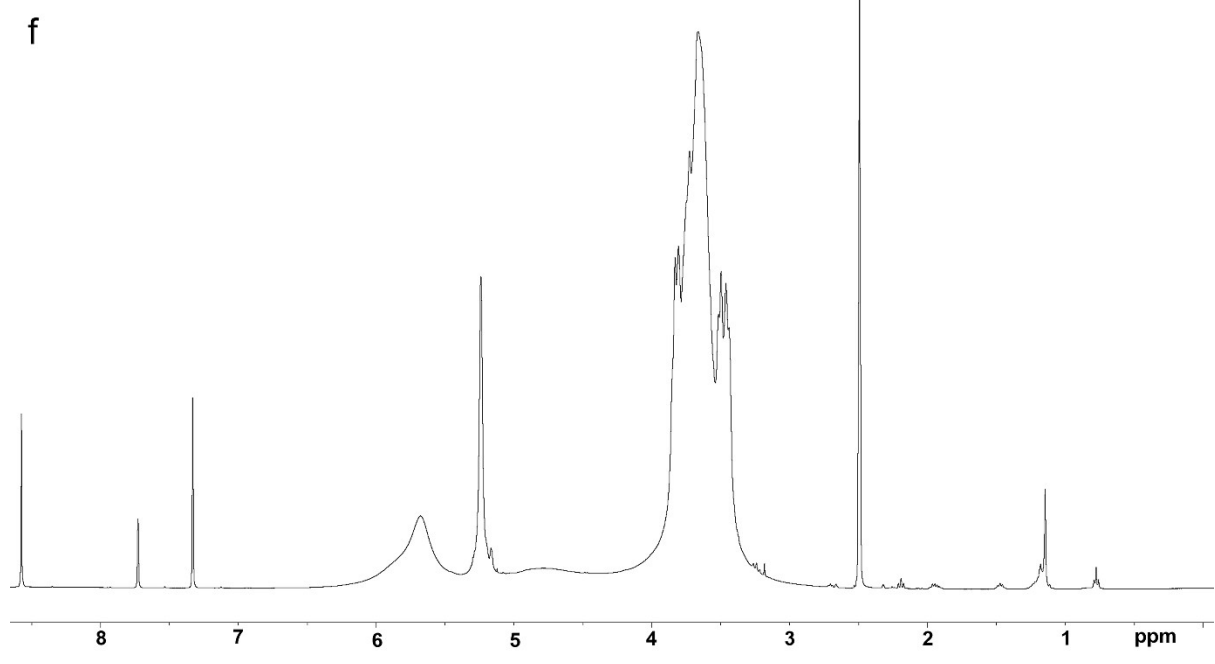

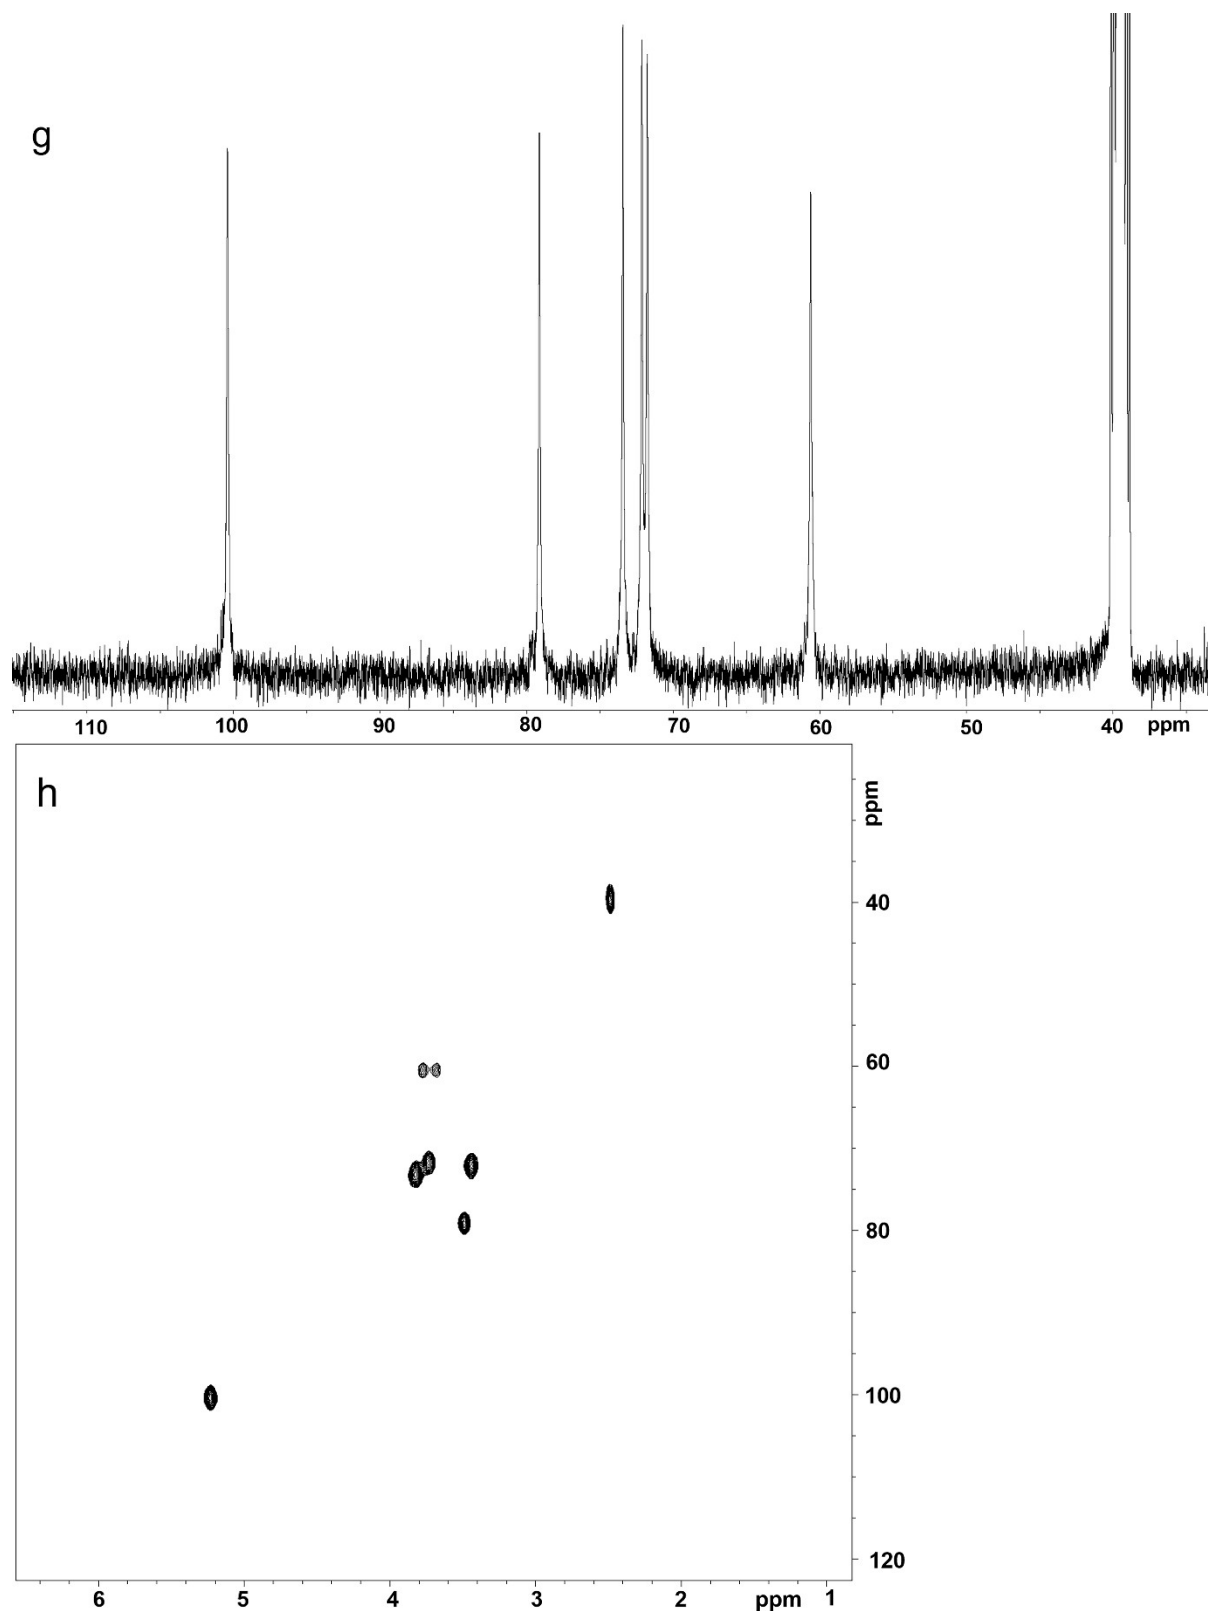

**Supplementary Fig. 15 NMR spectrum of the purified hemicellulose (H) and authentic starch in the solvent of DMSO- $d_6$ / pyridine- $d_5$  (v/v, 4/1).** **a**  $^{13}\text{C}$  of Willow wood (integral ratio of Xy-MG-OCH3/ Xy-MG-6 = 1/2.8323). **b**  $^{13}\text{C}$  of willow bark (integral ratio of Xy-MG -OCH3/ Xy-MG-6 = 1/9.0533). **c**  $^{13}\text{C}$  of willow inner bark (integral ratio of Xy-MG -OCH3/ Xy-MG-6 = 1/0.6501). **d**  $^{13}\text{C}$  of willow bark fiber bundle (integral ratio of Xy-MG -OCH3/ Xy-MG-6 = 1/0.3737). **e**  $^{13}\text{C}$  of parenchyma tissues. **f**  $^1\text{H}$  NMR of authentic starch. **g**  $^{13}\text{C}$  NMR of authentic starch. **h** HSQC NMR of authentic starch.

**Supplementary Table 8. Assignments of the <sup>1</sup>H–<sup>13</sup>C correlation peaks in the 2D-HSQC spectra of willow hemicelluloses (WW; WB; WIB; WBFB; and Parenchyma) in comparison to the literatures<sup>9,12,34,39,38</sup> and authentic starch.**

| full name                                   | abbreviations          | WW<br>(solvent of<br>DMSO-d <sub>6</sub> /<br>pyridine-<br>d <sub>5</sub> ) | WB<br>(DMSO-d <sub>6</sub> /<br>pyridine-<br>d <sub>5</sub> ) | WIB<br>(DMSO-d <sub>6</sub> /<br>pyridine-<br>d <sub>5</sub> ) | WBFB<br>(DMSO-d <sub>6</sub> /<br>pyridine-<br>d <sub>5</sub> ) | parenchyma<br>(DMSO-d <sub>6</sub> /<br>pyridine-d <sub>5</sub> ) | Nishimura<br>et al. 2018 <sup>38</sup><br>(DMSO-d <sub>6</sub> ) | Nobre et al.<br>2018 <sup>39</sup><br>(D <sub>2</sub> O) | Ding et al.<br>2019 <sup>12</sup><br>(D <sub>2</sub> O) | Yuan et al.<br>2010 <sup>34</sup> (D <sub>2</sub> O) | Sun et al.<br>2014 <sup>9</sup> (D <sub>2</sub> O) |
|---------------------------------------------|------------------------|-----------------------------------------------------------------------------|---------------------------------------------------------------|----------------------------------------------------------------|-----------------------------------------------------------------|-------------------------------------------------------------------|------------------------------------------------------------------|----------------------------------------------------------|---------------------------------------------------------|------------------------------------------------------|----------------------------------------------------|
| acetyl CH <sub>3</sub>                      | Xy-Acetyl              | 20.5/1.99                                                                   | 20.5/1.99                                                     | 20.5/1.99                                                      | 20.5/1.99                                                       | 20.5/1.99                                                         | —                                                                | —                                                        | 22.7/1.9                                                | —                                                    | —                                                  |
| (1-4)-β-D-Xylp (5b)                         | Xy-5b                  | 63.0/3.98                                                                   | 63.0/3.98                                                     | 63.0/3.98                                                      | 63.0/3.98                                                       | 63.0/3.98                                                         | —                                                                | —                                                        | 62.3/4.2                                                | 63.02/4.04                                           | 63.1/3.98                                          |
| (1-4)-β-D-Xylp (5a)                         | Xy-5a                  | 62.9/3.29                                                                   | 62.9/3.29                                                     | 62.9/3.29                                                      | 62.9/3.29                                                       | 62.9/3.29                                                         | —                                                                | —                                                        | 62.5/3.4                                                | 63.02/3.32                                           | 63.1/3.28                                          |
| (1-4)-β-D-Xylp (2)                          | Xy-2                   | 72.4/3.16                                                                   | 72.4/3.16                                                     | 72.4/3.16                                                      | 72.4/3.16                                                       | 72.4/3.16                                                         | —                                                                | —                                                        | 72.2/3.2                                                | 72.76/3.23                                           | 73.0/3.19                                          |
| (1-4)-β-D-Xylp (3)                          | Xy-3                   | 71.8/3.36                                                                   | 71.8/3.36                                                     | 71.8/3.36                                                      | 71.8/3.36                                                       | 71.8/3.36                                                         | —                                                                | —                                                        | 75.0/3.4                                                | 73.73/3.50                                           | 74.5/3.41                                          |
| (1-4)-β-D-Xylp (4)                          | Xy-4                   | 75.5/3.68                                                                   | 75.5/3.68                                                     | 75.5/3.68                                                      | 75.5/3.68                                                       | 75.5/3.68                                                         | —                                                                | —                                                        | 75.7/3.8                                                | 76.42/3.72                                           | 76.0/3.67                                          |
| (1-4)-β-D-Xylp (C1H1)                       | Xy-1                   | 101.9/4.37                                                                  | 101.9/4.37                                                    | 101.9/4.37                                                     | 101.9/4.37                                                      | 101.9/4.37                                                        | —                                                                | —                                                        | 101.1/4.4                                               | 101.73/4.41                                          | —                                                  |
| 2-O-acetyl-β-D-Xylp (2)                     | Xy-2-O-Ac-2            | 73.1/4.63                                                                   | 73.1/4.63                                                     | 73.1/4.63                                                      | —                                                               | —                                                                 | —                                                                | —                                                        | 73.6/4.6                                                | —                                                    | —                                                  |
| 2-O-acetyl-β-D-Xylp (1)                     | Xy-2-O-Ac-1            | 99.6/4.57                                                                   | 99.6/4.57                                                     | 99.6/4.57                                                      | —                                                               | —                                                                 | —                                                                | —                                                        | 99.4/4.6                                                | —                                                    | —                                                  |
| 3-O-acetyl-β-D-Xylp (1)                     | Xy-3-O-Ac-1            | 101.9/4.39                                                                  | 101.9/4.39                                                    | 101.9/4.39                                                     | —                                                               | —                                                                 | —                                                                | —                                                        | 101.9/4.3                                               | —                                                    | —                                                  |
| 3-O-acetyl-β-D-Xylp (3)                     | Xy-3-O-Ac-3            | 74.66/4.92                                                                  | 74.66/4.92                                                    | 74.66/4.92                                                     | —                                                               | —                                                                 | —                                                                | —                                                        | —                                                       | —                                                    | —                                                  |
| 2,3-di-O-Ac-b-D-Xylp                        | Xy-2,3-di-O-Ac-1       | —                                                                           | —                                                             | —                                                              | —                                                               | 99.09/4.75                                                        | —                                                                | —                                                        | —                                                       | —                                                    | —                                                  |
| 4-O-Me-α-D-Glucuronic acid(C1H1) GlcpA      | Xy-MG-1                | 97.2/5.31                                                                   | —                                                             | —                                                              | —                                                               | —                                                                 | —                                                                | —                                                        | 97.5/5.3                                                | 97.60/5.22                                           | 97.4/5.19                                          |
| 4-O-Me-α-D-Glucuronic acid(C2H2) GlcpA      | Xy-MG-2                | 71.72/3.57                                                                  | —                                                             | —                                                              | —                                                               | —                                                                 | —                                                                | —                                                        | —                                                       | 71.33/3.52                                           | 71.5/3.46                                          |
| 4-O-Me-α-D-Glucuronic acid(C3H3) GlcpA      | Xy-MG-3                | 71.81/3.74                                                                  | —                                                             | —                                                              | —                                                               | —                                                                 | —                                                                | —                                                        | —                                                       | 72.18/3.70                                           | 72.2/3.60                                          |
| 4-O-Me-α-D-Glucuronic acid(C4H4) GlcpA      | Xy-MG-4                | 81.3/3.23                                                                   | —                                                             | —                                                              | —                                                               | —                                                                 | —                                                                | —                                                        | 81.7/3.23                                               | 82.49/3.16                                           | 82.4/3.11                                          |
| 4-O-Me-α-D-Glucuronic acid(C5H5) GlcpA      | Xy-MG-5                | 70.18/4.01                                                                  | —                                                             | —                                                              | —                                                               | —                                                                 | —                                                                | —                                                        | —                                                       | 72.27/4.25                                           | 72.1/4.22                                          |
| 4-O-Me-α-D-Glucuronic acid (methoxyl) GlcpA | Xy-MG-OCH <sub>3</sub> | 55.8/3.46                                                                   | 55.8/3.46                                                     | 55.8/3.46                                                      | 55.8/3.46                                                       | —                                                                 | —                                                                | —                                                        | 55.6/3.8                                                | —                                                    | —                                                  |
| galactomannan (1)                           | GAMA-1                 | —                                                                           | 98.9/4.76                                                     | 98.9/4.76                                                      | 98.9/4.76                                                       | —                                                                 | —                                                                | 100.62/4.74                                              | —                                                       | —                                                    | —                                                  |
| galactomannan (2)                           | GAMA-2                 | —                                                                           | 70.2/4.02                                                     | 70.2/4.02                                                      | 70.2/4.02                                                       | —                                                                 | —                                                                | 70.59/4.12                                               | —                                                       | —                                                    | —                                                  |
| galactomannan (3)                           | GAMA-3                 | —                                                                           | 71.73/3.77                                                    | 71.73/3.77                                                     | 71.73/3.77                                                      | —                                                                 | —                                                                | 71.83/3.79                                               | —                                                       | —                                                    | —                                                  |
| galactomannan (4)                           | GAMA-4                 | —                                                                           | 76.06/3.78                                                    | 76.06/3.78                                                     | 76.06/3.78                                                      | —                                                                 | —                                                                | 77.36/3.86                                               | —                                                       | —                                                    | —                                                  |
| galactomannan (5)                           | GAMA-5                 | —                                                                           | 74.02/3.65                                                    | 74.02/3.65                                                     | 74.02/3.65                                                      | —                                                                 | —                                                                | 74.05/3.64                                               | —                                                       | —                                                    | —                                                  |
| galactomannan (6)                           | GAMA-6                 | —                                                                           | 66.6/4.12                                                     | 66.6/4.12                                                      | 66.6/4.12                                                       | —                                                                 | —                                                                | 67.22/3.96                                               | —                                                       | —                                                    | —                                                  |
| branched galactose of GAMA (1)              | GAMA-1'                | —                                                                           | 97.3/5.34                                                     | 97.3/5.34                                                      | 97.3/5.34                                                       | 97.3/5.34                                                         | —                                                                | 99.48/5.02                                               | —                                                       | —                                                    | —                                                  |
| branched galactose of GAMA (2)              | GAMA-2'                | —                                                                           | 67.7/3.74                                                     | 67.7/3.74                                                      | 67.7/3.74                                                       | 67.7/3.74                                                         | —                                                                | 68.55/3.80                                               | —                                                       | —                                                    | —                                                  |
| branched galactose of GAMA (3)              | GAMA-3'                | —                                                                           | 71.1/3.84                                                     | 71.1/3.84                                                      | 71.1/3.84                                                       | 71.1/3.84                                                         | —                                                                | 70.10/3.92                                               | —                                                       | —                                                    | —                                                  |
| branched galactose of GAMA (4)              | GAMA-4'                | —                                                                           | 70.9/4.02                                                     | 70.9/4.02                                                      | 70.9/4.02                                                       | 70.9/4.02                                                         | —                                                                | 69.96/4.00                                               | —                                                       | —                                                    | —                                                  |
| branched galactose of GAMA (5)              | GAMA-5'                | —                                                                           | 71.92/3.86                                                    | 71.92/3.86                                                     | 71.92/3.86                                                      | 71.92/3.86                                                        | —                                                                | 71.42/3.89                                               | —                                                       | —                                                    | —                                                  |
| branched galactose of GAMA (6)              | GAMA-6'                | —                                                                           | 60.88/3.67                                                    | 60.88/3.67                                                     | 60.88/3.67                                                      | 60.88/3.67                                                        | —                                                                | 61.80/3.76                                               | —                                                       | —                                                    | —                                                  |
| glucomannan C1'/H1' (glucose)               | GLMA-1'                | 103.1/4.25                                                                  | 103.1/4.25                                                    | 103.1/4.25                                                     | 103.1/4.25                                                      | 102.6/4.45                                                        | 100.5/4.54                                                       | —                                                        | —                                                       | —                                                    | 102.1/4.34                                         |
| glucomannan (1) (mannose branch side)       | GLMA-1                 | —                                                                           | 101.2/4.49                                                    | 101.2/4.49                                                     | 101.2/4.49                                                      | 101.2/4.49                                                        | 100.6/4.46                                                       | —                                                        | —                                                       | —                                                    | —                                                  |
| glucomannan (2)                             | GLMA-2                 | —                                                                           | 71.82/3.59                                                    | 71.82/3.59                                                     | 71.82/3.59                                                      | 71.82/3.59                                                        | 70.5/3.65                                                        | —                                                        | —                                                       | —                                                    | —                                                  |
| glucomannan (3)                             | GLMA-3                 | —                                                                           | 72.82/3.72                                                    | 72.82/3.72                                                     | 72.82/3.72                                                      | 72.82/3.72                                                        | 71.0/3.62                                                        | —                                                        | —                                                       | —                                                    | —                                                  |
| glucomannan (4)                             | GLMA-4                 | —                                                                           | 76.97/3.76                                                    | 76.97/3.76                                                     | 76.97/3.76                                                      | 76.97/3.76                                                        | 78.0/3.76                                                        | —                                                        | —                                                       | —                                                    | —                                                  |
| glucomannan (5)                             | GLMA-5                 | —                                                                           | 69.3/3.87                                                     | 69.3/3.87                                                      | 69.3/3.87                                                       | 69.3/3.87                                                         | 69.0/3.64                                                        | —                                                        | —                                                       | —                                                    | —                                                  |
| glucomannan (6)                             | GLMA-6                 | —                                                                           | 68.7/3.73                                                     | 68.7/3.73                                                      | 68.7/3.73                                                       | 68.7/3.73                                                         | 68.1/3.48                                                        | —                                                        | —                                                       | —                                                    | —                                                  |
| Starch (1)                                  | St-1                   |                                                                             |                                                               |                                                                |                                                                 | 100.08/ 5.228                                                     |                                                                  |                                                          |                                                         |                                                      |                                                    |
| Starch (2)                                  | St-2                   |                                                                             |                                                               |                                                                |                                                                 | 72.05/3.44                                                        |                                                                  |                                                          |                                                         |                                                      |                                                    |
| Starch (3)                                  | St-3                   |                                                                             |                                                               |                                                                |                                                                 | 73.07/3.82                                                        |                                                                  |                                                          |                                                         |                                                      |                                                    |
| Starch (4)                                  | St-4                   |                                                                             |                                                               |                                                                |                                                                 | 79.03/3.49                                                        |                                                                  |                                                          |                                                         |                                                      |                                                    |
| Starch (5)                                  | St-5                   |                                                                             |                                                               |                                                                |                                                                 | 71.69/3.73                                                        |                                                                  |                                                          |                                                         |                                                      |                                                    |
| Starch (6a)                                 | St-6a                  |                                                                             |                                                               |                                                                |                                                                 | 60.44/3.77                                                        |                                                                  |                                                          |                                                         |                                                      |                                                    |
| Starch (6b)                                 | St-6b                  |                                                                             |                                                               |                                                                |                                                                 | 60.33/3.68                                                        |                                                                  |                                                          |                                                         |                                                      |                                                    |

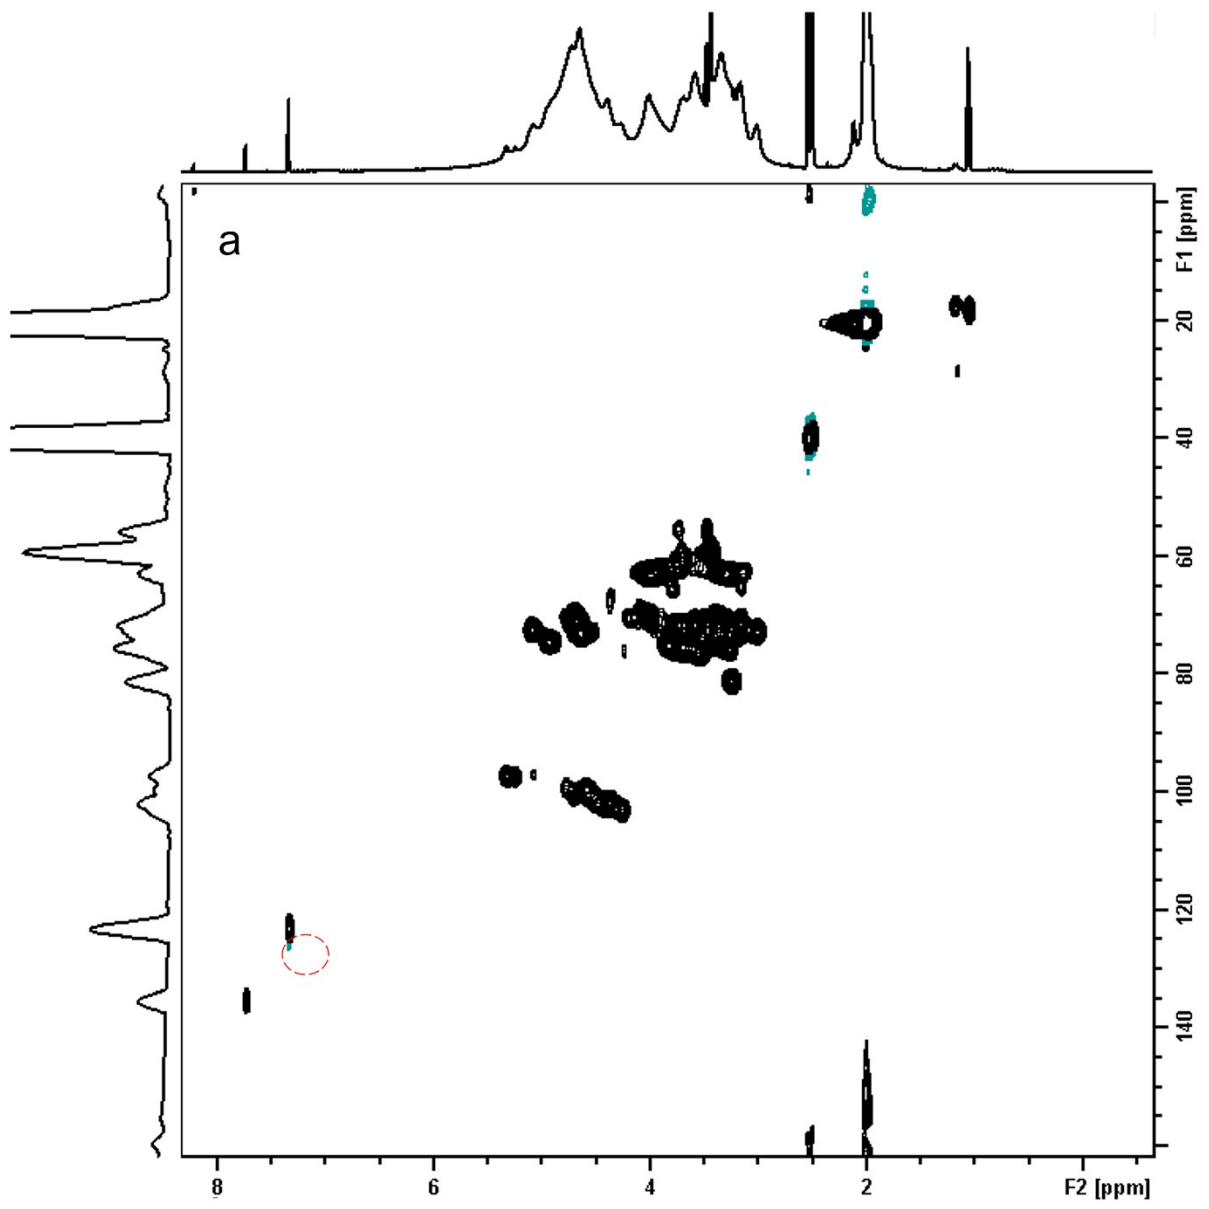



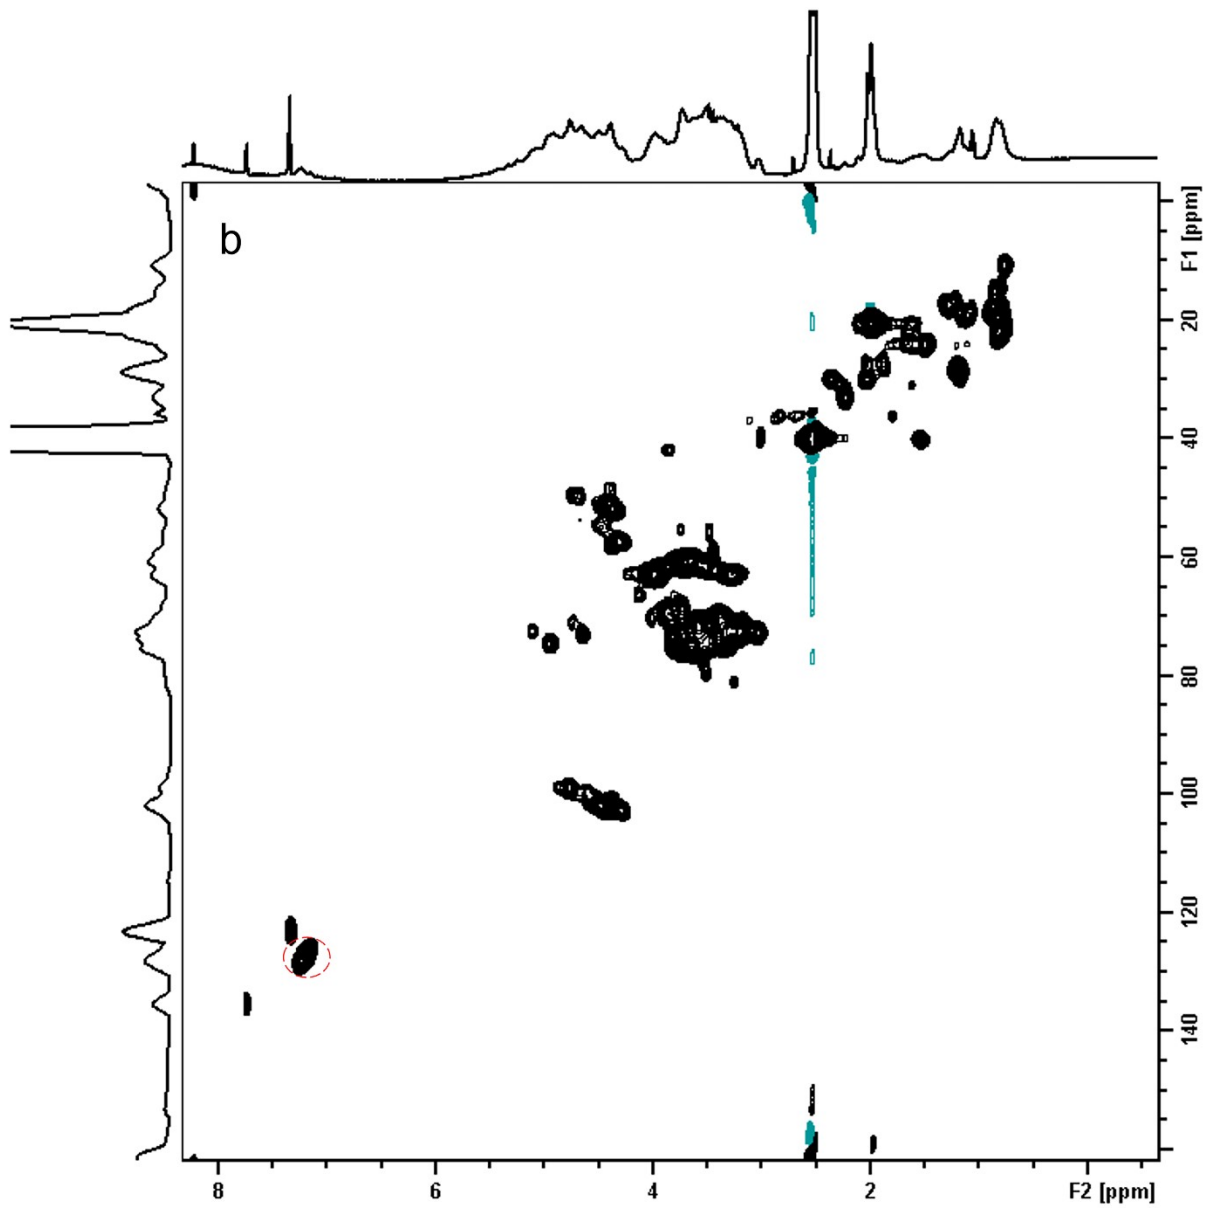

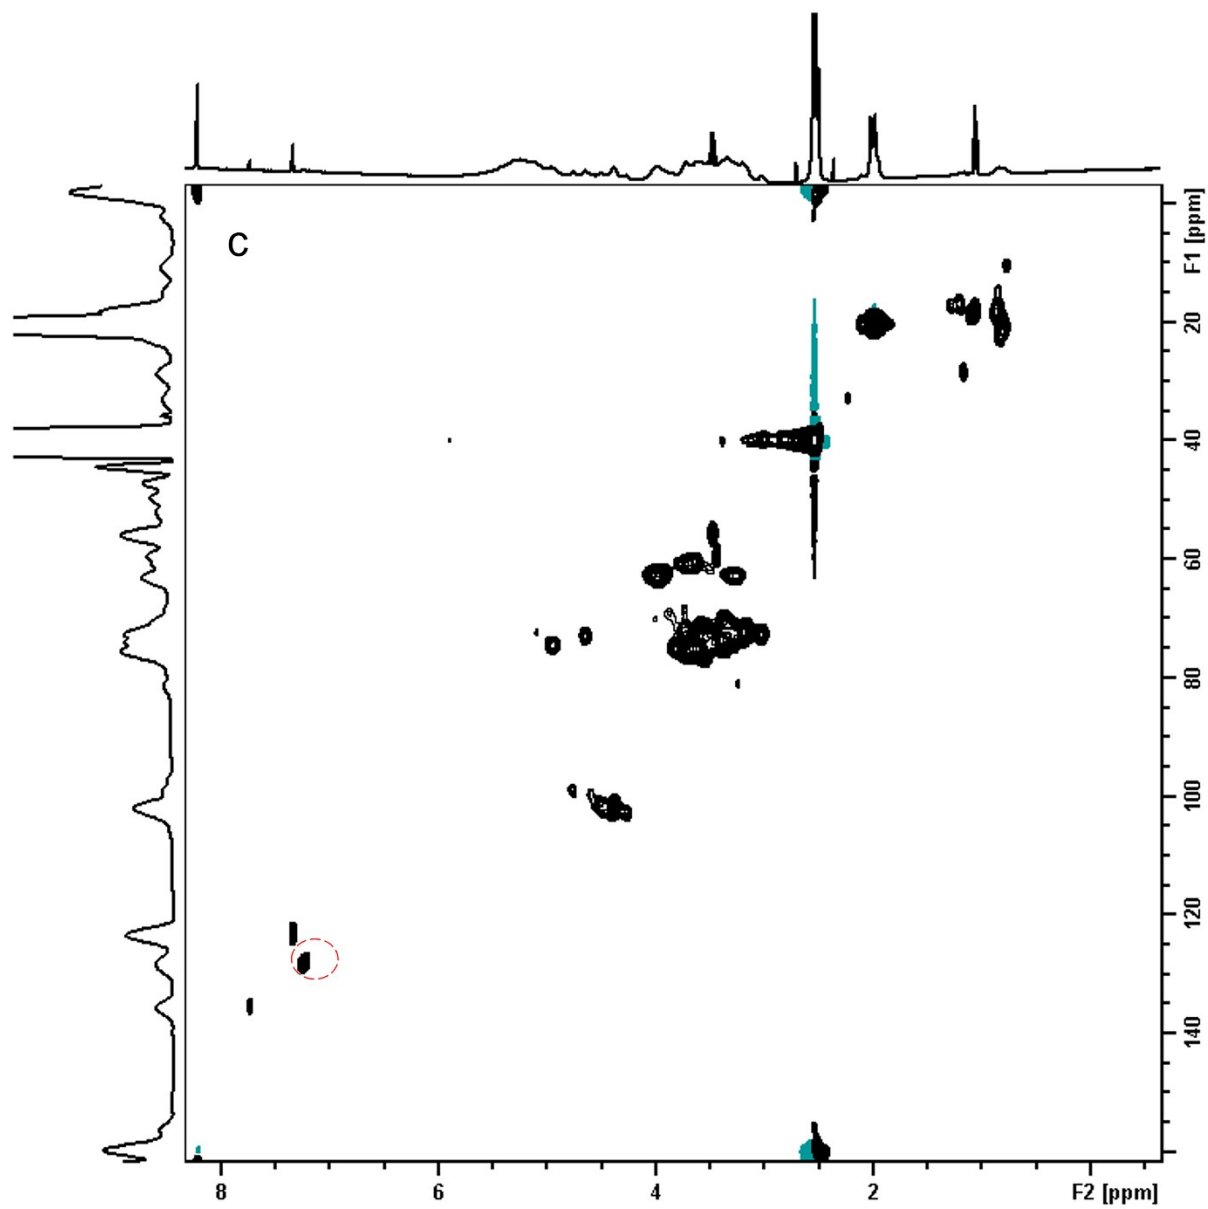

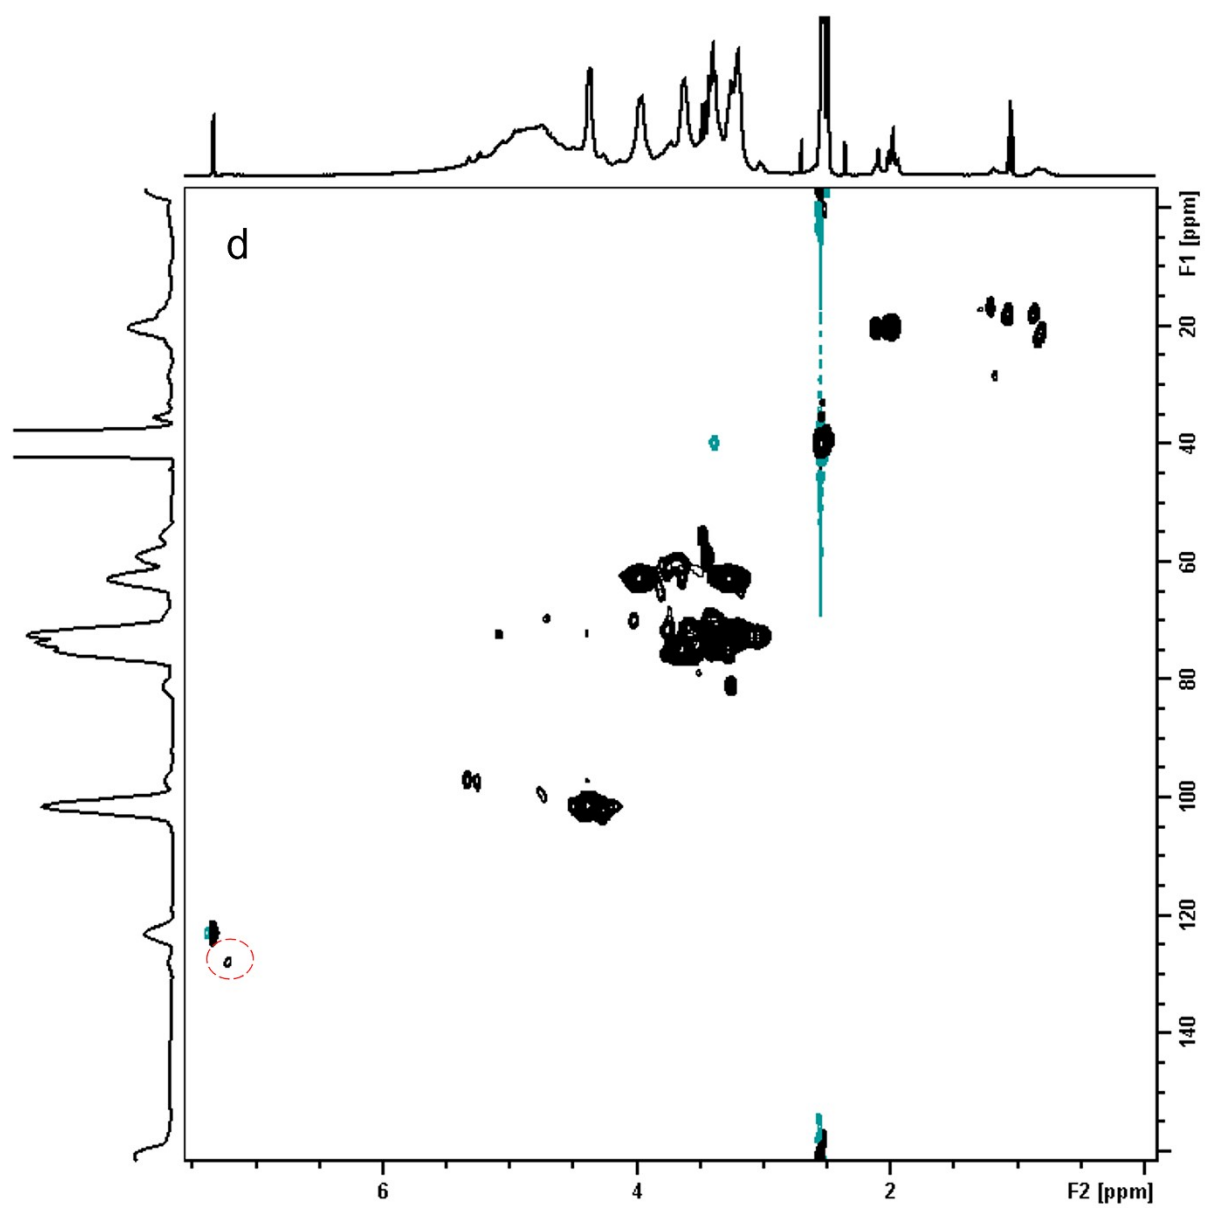

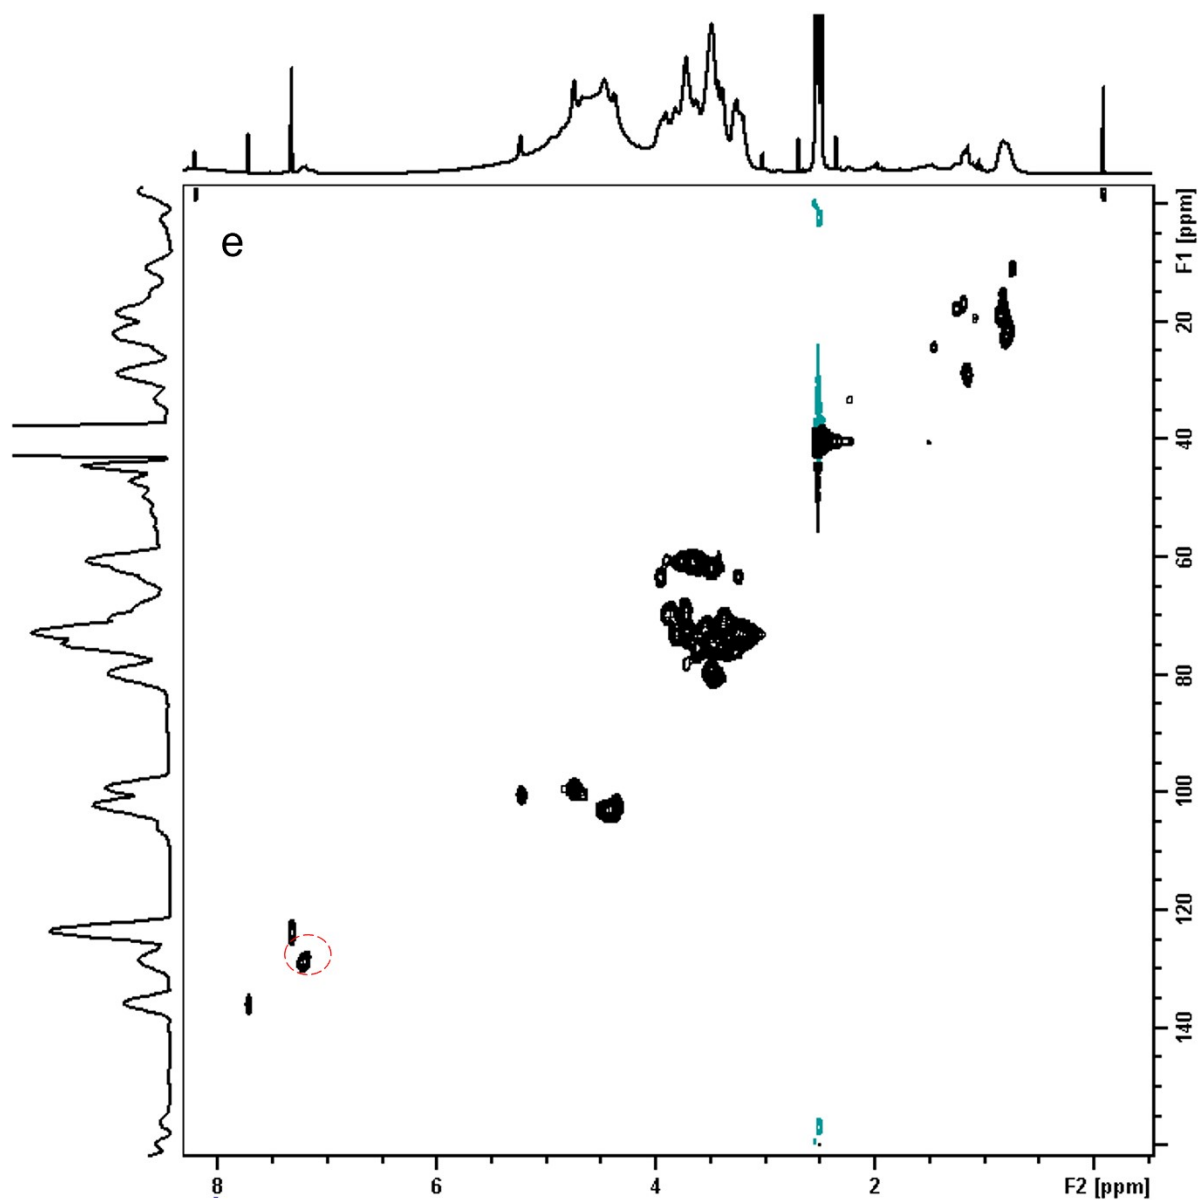

**Supplementary Fig. 16** 2D heteronuclear single quantum coherence (HSQC) NMR spectrum ( $\delta_{\text{C}}/\delta_{\text{H}}$ , 0–160/0–8.3 ppm) of the purified hemicellulose. **a** Willow wood. **b** Willow bark. **c** Willow inner bark. **d** Willow bark fiber bundle. **e** Parenchyma tissues. The phenylalanine protein ( $\delta_{\text{C}}/\delta_{\text{H}}$ , 129/7.20 ppm)<sup>5</sup> was identified and highlighted in red circle.

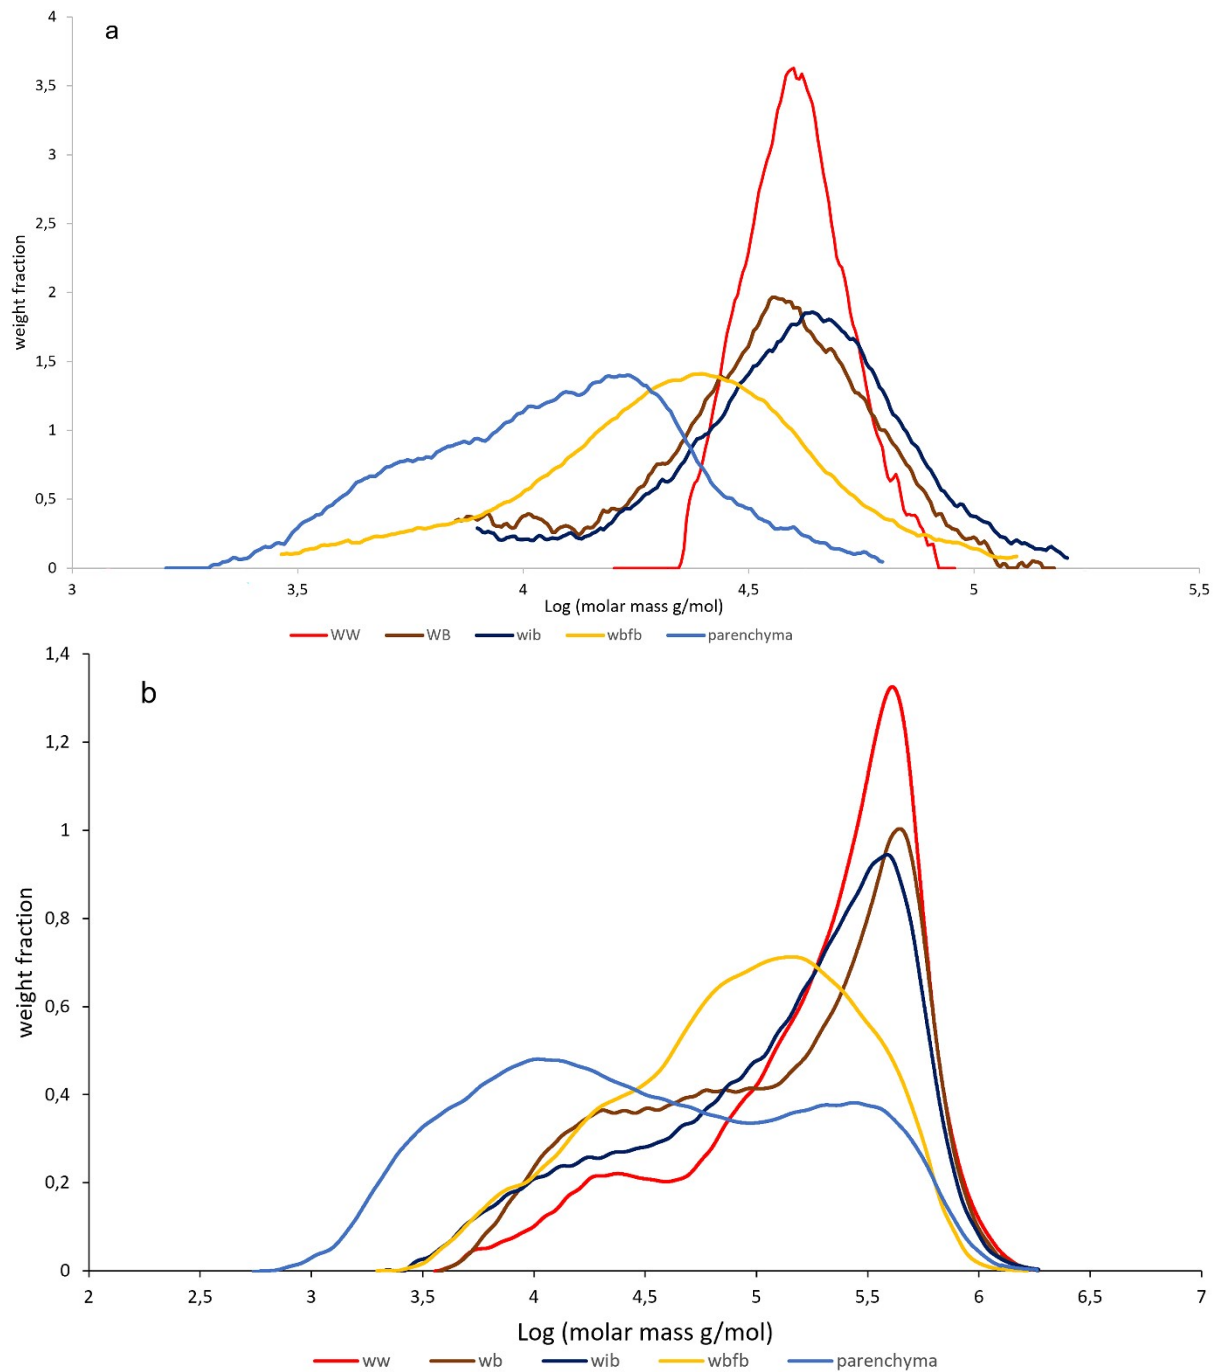

**Supplementary Fig. 17 SEC molecular weight (Mw) spectrum distributions of willow samples (WW; WB; WIB; WBFB; and Parenchyma tissues) from the fractionation scheme supplementary Fig. 6. a** Hemicellulose. **b** Purified “cellulose” (extracted as a side fraction from the DMSO purification of hemicellulose). For their real molecular weight (MW) values, see **Supplementary Table 9**.

**Supplementary Table 9. SEC molecular weight (Mw) spectrum distributions that is measured by gel-permeation chromatography (GPC). a Purified hemicellulose. b Purified cellulose.**

|            | hemicellulose |          |          |          |     | cellulose |          |          |          |     |
|------------|---------------|----------|----------|----------|-----|-----------|----------|----------|----------|-----|
|            | Mn (kDa)      | Mw (kDa) | Mz (kDa) | Mp (kDa) | PD  | Mn (kDa)  | Mw (kDa) | Mz (kDa) | Mp (kDa) | PD  |
| WW         | 39.0          | 41.6     | 44.6     | 39.8     | 1.1 | 69.1      | 280.0    | 455.3    | 348.2    | 4.1 |
| WB         | 27.4          | 38.5     | 49.1     | 35.7     | 1.4 | 47.4      | 238.8    | 446.6    | 402.3    | 5.0 |
| WIB        | 32.9          | 45.8     | 59.9     | 43.8     | 1.4 | 48.9      | 231.9    | 428.1    | 335.1    | 4.8 |
| WBFB       | 16.2          | 27.1     | 40.8     | 24.7     | 1.7 | 35.4      | 151.5    | 325.0    | 152.5    | 4.3 |
| Parenchyma | 9.3           | 14.4     | 21.1     | 17.0     | 1.6 | 36.4      | 262.8    | 400.8    | 35.4     | 8.9 |

**Supplementary Table 10. Determination of the “Klason Lignin” (100 %) from the 1) original biomass (as received); 2) “all-pretreatment” refers to the solid residue after extraction treatment (DCM/ acetone/ water), pepsin treatment, and 0.1M NaOH treatment; 3) refers to the solid residue after “all-pretreatment” plus the dioxane-water extraction treatment. Calculation of 'klason lignin' removal (100%) = (Klason lignin (2)- Klason lignin (3))/ Klason lignin (2). Standard deviations are included in the parenthesis.**

|      | 1) original  | 2) after “all-pretreatment” | 3) after “dioxane-extraction” | “klason lignin” removal |
|------|--------------|-----------------------------|-------------------------------|-------------------------|
| WW   | 0.19 (0.01)  | 0.19                        | 0.03 (0.004)                  | 0.84                    |
| WB   | 0.28 (0.01)  | 0.16                        | 0.12 (0.014)                  | 0.22                    |
| WIB  | 0.17 (0.001) | 0.07                        | 0.04 (0.001)                  | 0.42                    |
| WBFB | 0.17 (0.01)  | 0.10                        | 0.05 (0.008)                  | 0.52                    |

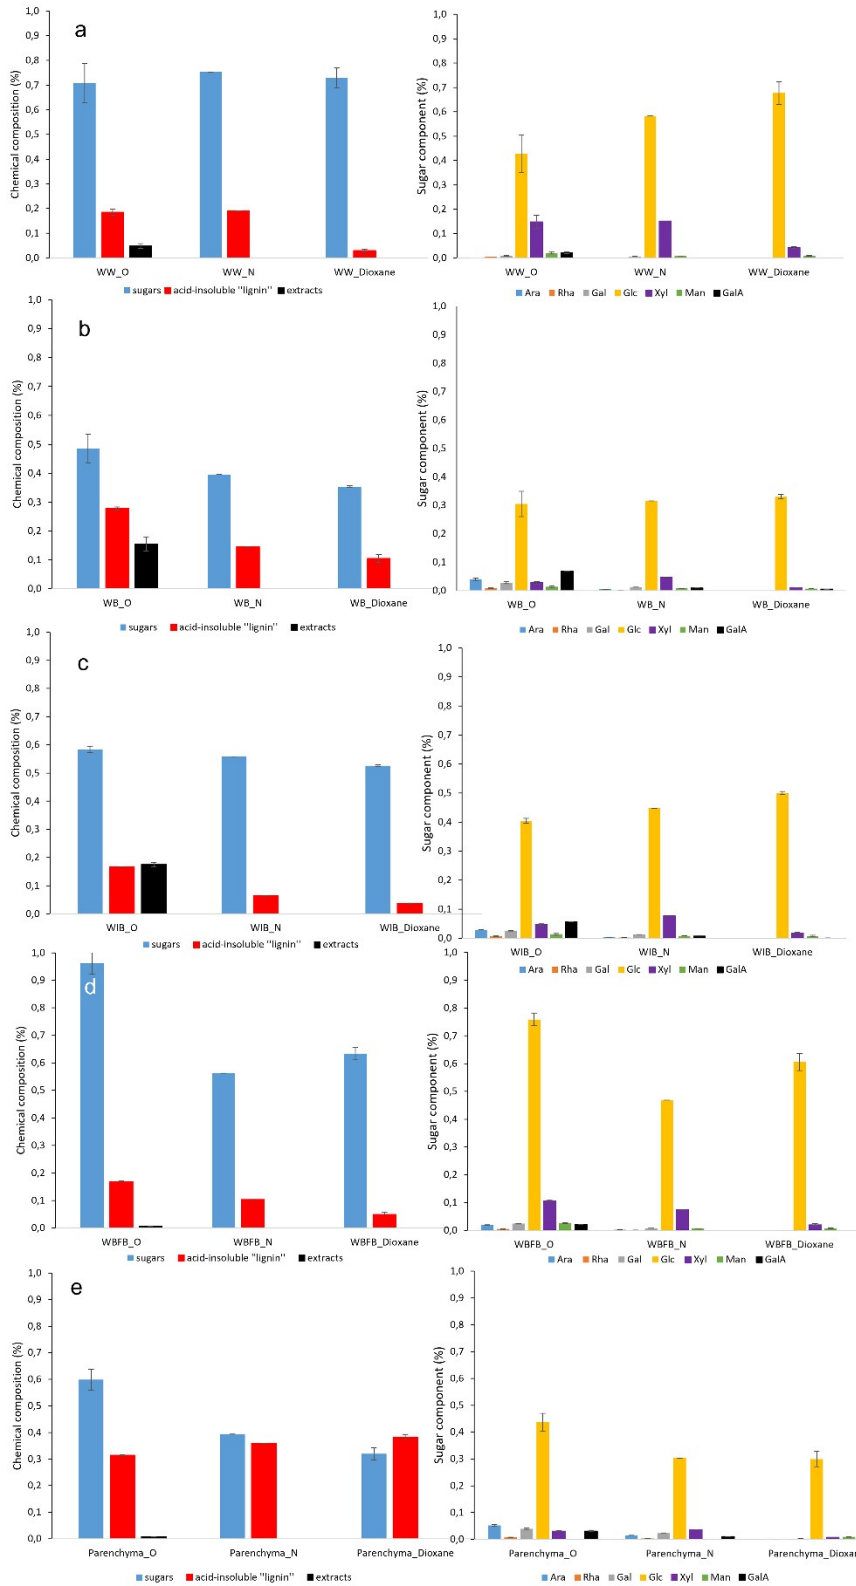

**Supplementary Fig. 18 Overall chemical composition (% of the dry mass) (left) and carbohydrate composition (% of anhydro sugars in the monosaccharide from the dry mass) (right) from five different samples. a Willow wood. b Willow bark. c Willow inner bark. d Willow bark fiber bundle. e Parenchyma tissues that are collected from their original form (O), 0.1M NaOH treated solid residue (N), and solid residues after the dioxane extraction (Dioxane) (Supplementary Fig. 6). For abbreviations, see Supplementary Fig. 1–5. Standard deviations are included as the error bars.**



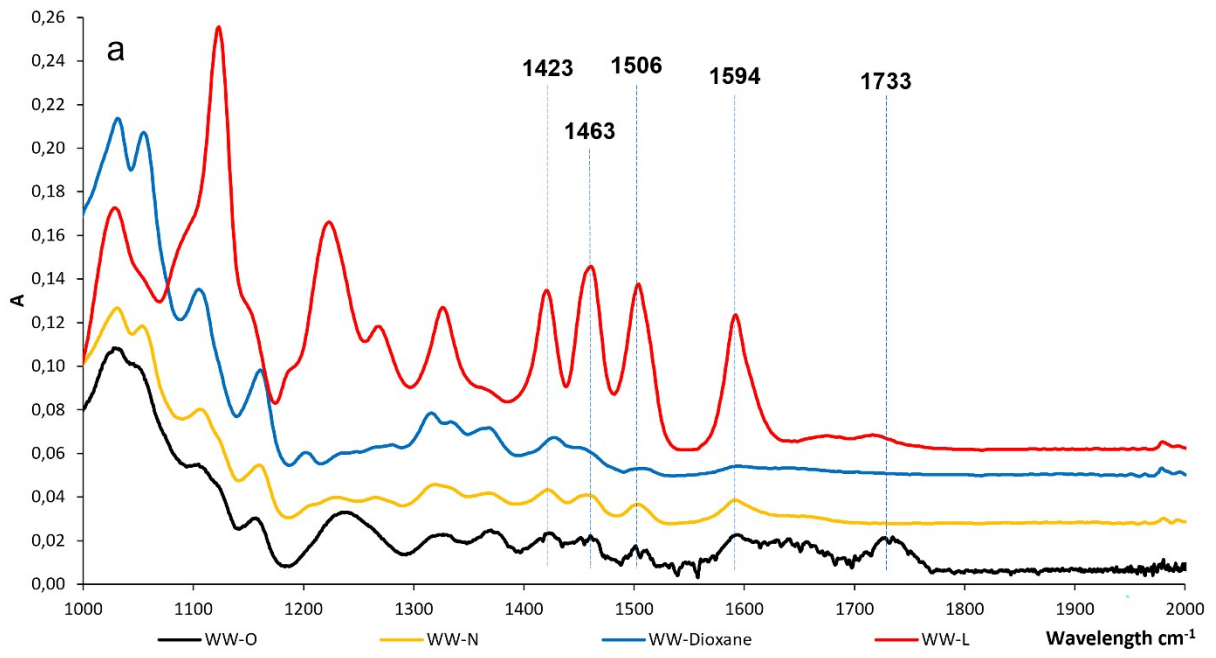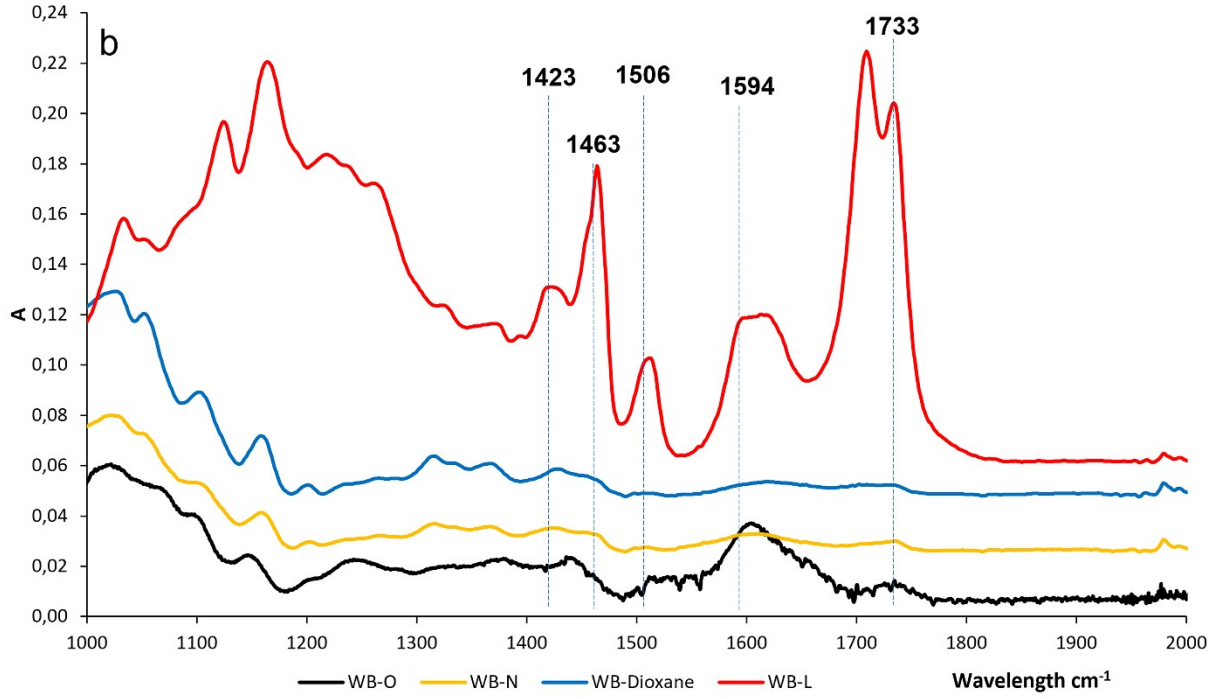

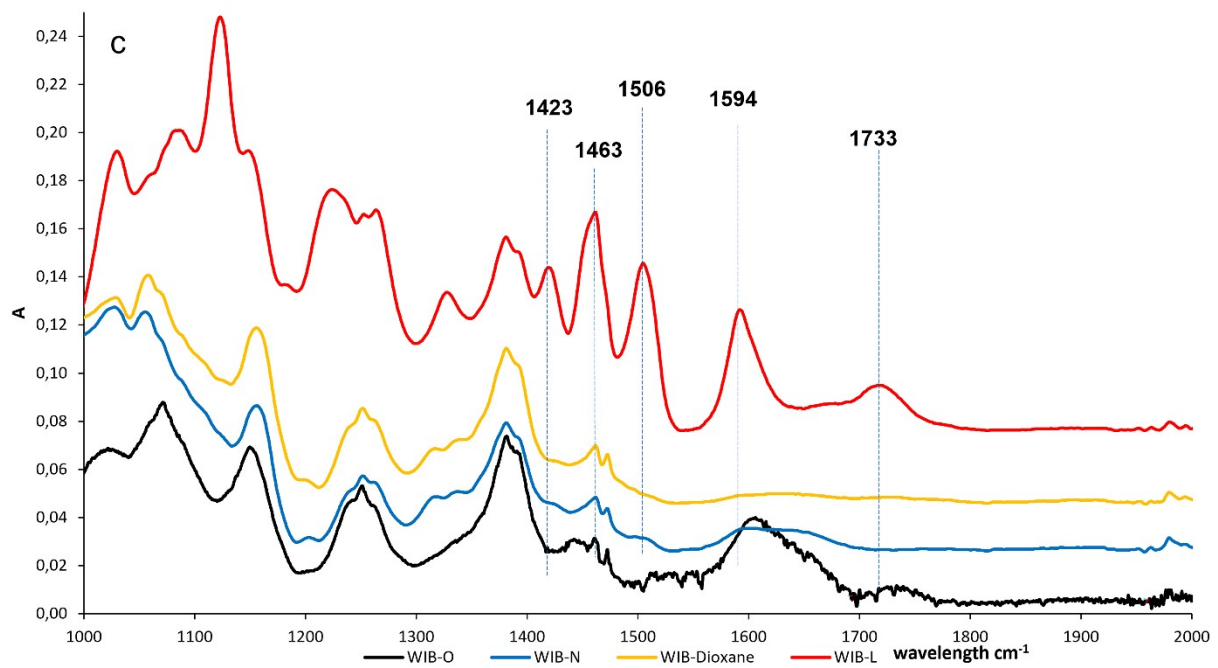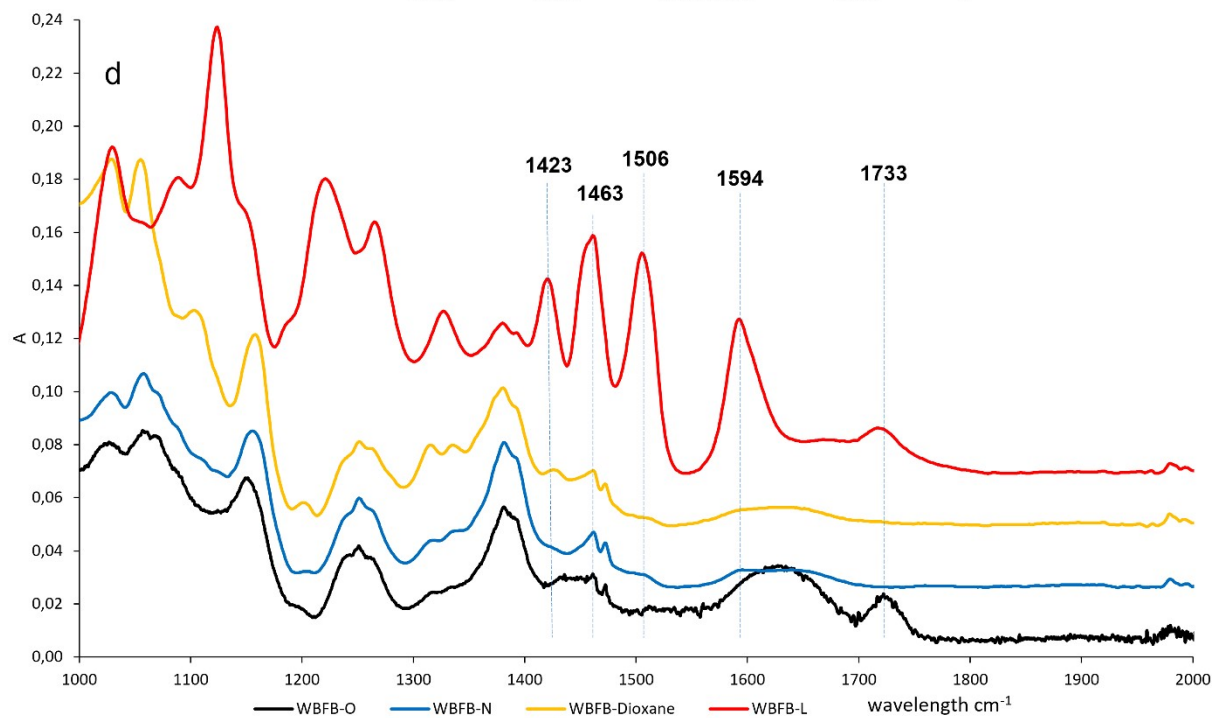

**Supplementary Fig. 19** FT-IR spectrum of four different samples that is collected from their original form (O), 0.1M NaOH treated solid residue (N), solid residues after the dioxane/ water extraction (Dioxane), and the recovered dioxane lignin (L) (Supplementary Fig. 6). a Wood. b Bark. c Inner bark. d Fiber bundle. For abbreviations, see Supplementary Fig. 1-5.

**Supplementary Table 11. Assignments of the dioxane lignin in the CP/MAS NMR spectra from willow wood (WW) and bark (WB; WIB; WFBF; and Parenchyma).**

| <sup>13</sup> C shift [ppm] | assignment                                                                                                |
|-----------------------------|-----------------------------------------------------------------------------------------------------------|
| 20.9                        | C4-C8 of the interflavonoid linkages of tannin or some aliphatic fats (aliphatic chains); extractive fats |
| 30.3                        | aliphatic methylenes linked to carboxylic moieties in suberin                                             |
| 33.2                        | —OCH methylene adjacent to ester groups in suberin                                                        |
| 56.1                        | M—COOCH <sub>3</sub> in pectin                                                                            |
| 62.6 and 65.1               | C6 carbon of non-crystalline and crystalline cellulose                                                    |
| 72.40                       | C2,3,5 of cellulose                                                                                       |
| 75.0                        | C2,3,5 of cellulose and hemicellulose                                                                     |
| 83.9                        | C4 carbon of non-crystalline cellulose                                                                    |
| 89.0                        | C4 carbon of crystalline cellulose                                                                        |
| 105.4                       | C1 carbon of cellulose                                                                                    |
| 118.9                       | C2,6 aromatic carbons of syringyl in lignin                                                               |
| 136.4                       | C1 aromatic carbons of syringyl in lignin                                                                 |
| 148                         | C4 aromatic carbons of syringyl in lignin                                                                 |
| 154                         | C3 and C5 aromatic carbons of syringyl in lignin                                                          |
| 174.3                       | carboxyl groups of hemicelluloses or suberin                                                              |

**Supplementary Table 12. Assignments of the <sup>13</sup>C–<sup>1</sup>H correlation peaks in the 2D HSQC spectra of dioxane lignin (Supplementary Fig. 5) from willow wood (WW) and bark (WB; WIB; WFBF; and Parenchyma).**

| label               | $\delta C/\delta H$ (ppm) | assignment                                                                                                  |
|---------------------|---------------------------|-------------------------------------------------------------------------------------------------------------|
| B <sub>β</sub>      | 53.3/3.51                 | C <sub>β</sub> –H <sub>β</sub> in phenylcoumaran substructures ( <b>B</b> )                                 |
| C <sub>β</sub>      | 53.8/3.10                 | C <sub>β</sub> –H <sub>β</sub> in β–β' resinol substructures ( <b>C</b> )                                   |
| –OCH <sub>3</sub>   | 55.6/3.74                 | C–H in methoxyls                                                                                            |
| A <sub>γ</sub>      | 59.8/3.76 and 58.9/3.52   | C <sub>γ</sub> –H <sub>γ</sub> in γ-hydroxylated β–O–4' substructures ( <b>A</b> )                          |
| B <sub>γ</sub>      | 62.9/3.77                 | C <sub>γ</sub> –H <sub>γ</sub> in phenylcoumaran substructures ( <b>B</b> )                                 |
| C <sub>γ</sub>      | 71.2/3.87 and 71.1/4.22   | C <sub>γ</sub> –H <sub>γ</sub> in β–β' resinol substructures ( <b>C</b> )                                   |
| A <sub>α</sub>      | 71.9/5.03                 | C <sub>α</sub> –H <sub>α</sub> in β–O–4' substructures ( <b>A</b> ) linked to S-unit                        |
| A <sub>β(H/G)</sub> | 84.0/4.45                 | C <sub>β</sub> –H <sub>β</sub> in β–O–4' substructures ( <b>A</b> ) linked to H- and G- unit                |
| C <sub>α</sub>      | 85.1/4.72                 | C <sub>α</sub> –H <sub>α</sub> in β–β' resinol substructures ( <b>C</b> )                                   |
| A <sub>β(S)</sub>   | 86.1/4.25                 | C <sub>β</sub> –H <sub>β</sub> in β–O–4' substructures linked ( <b>A</b> ) to S unit                        |
| B <sub>α</sub>      | 87.2/5.59                 | C <sub>α</sub> –H <sub>α</sub> in phenylcoumaran substructures ( <b>B</b> )                                 |
| S <sub>2,6</sub>    | 104.2/6.80 and 106.5/7.40 | C <sub>2</sub> –H <sub>2</sub> and C <sub>6</sub> –H <sub>6</sub> in etherified syringyl units ( <b>S</b> ) |
| G <sub>2</sub>      | 110.8/6.95 and 111.3/7.10 | C <sub>2</sub> –H <sub>2</sub> in guaiacyl units ( <b>G</b> )                                               |
| FA <sub>β</sub>     | 114.28/ 6.51              | C <sub>β</sub> –H <sub>β</sub> in ferulic acid substructures ( <b>FA</b> )                                  |
| G <sub>5/G6</sub>   | 114.8/6.80 and 119.1/6.90 | C <sub>5</sub> –H <sub>5</sub> and C <sub>6</sub> –H <sub>6</sub> in guaiacyl units ( <b>G</b> )            |
| FA <sub>α</sub>     | 144.39/ 7.61              | C <sub>α</sub> –H <sub>α</sub> in ferulic acid substructures ( <b>FA</b> )                                  |

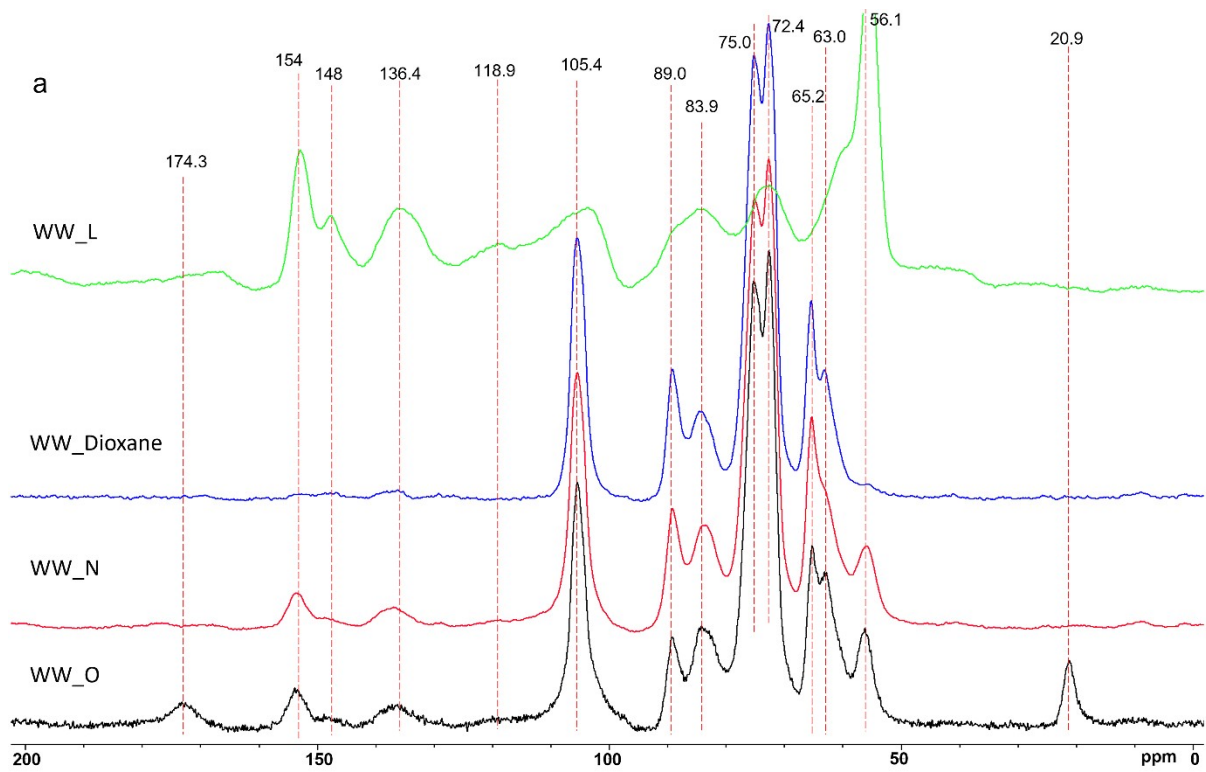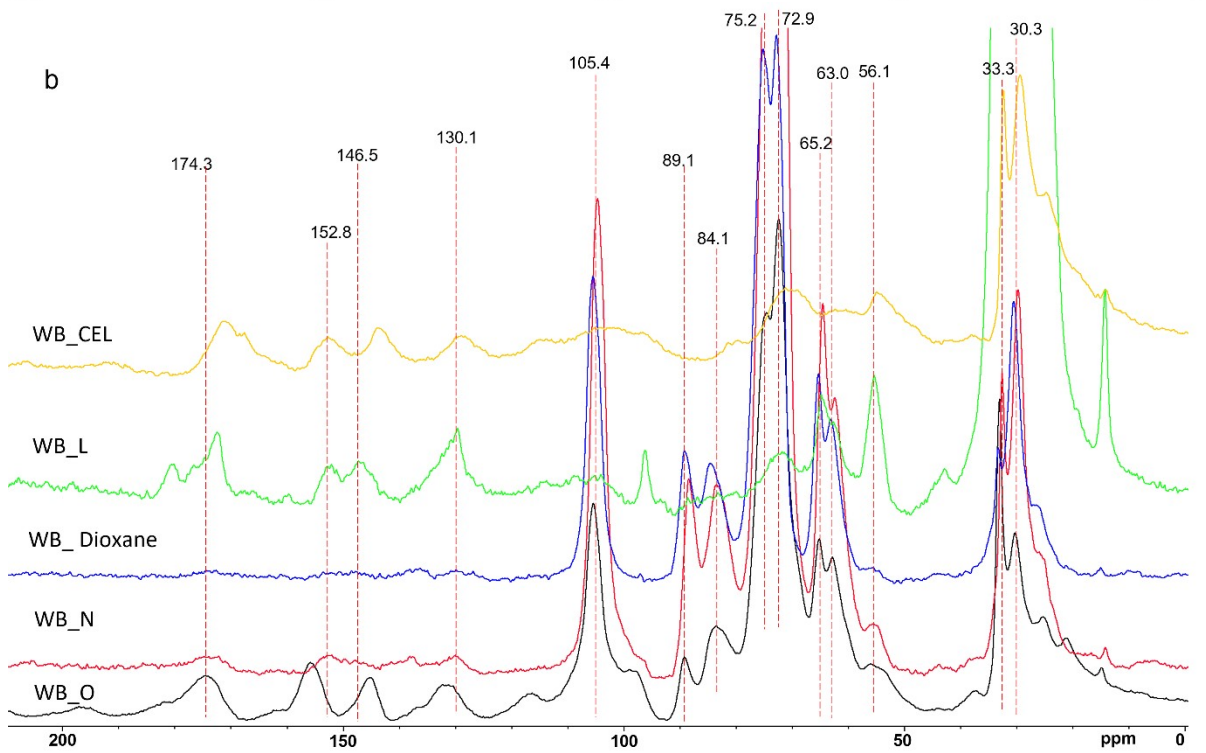

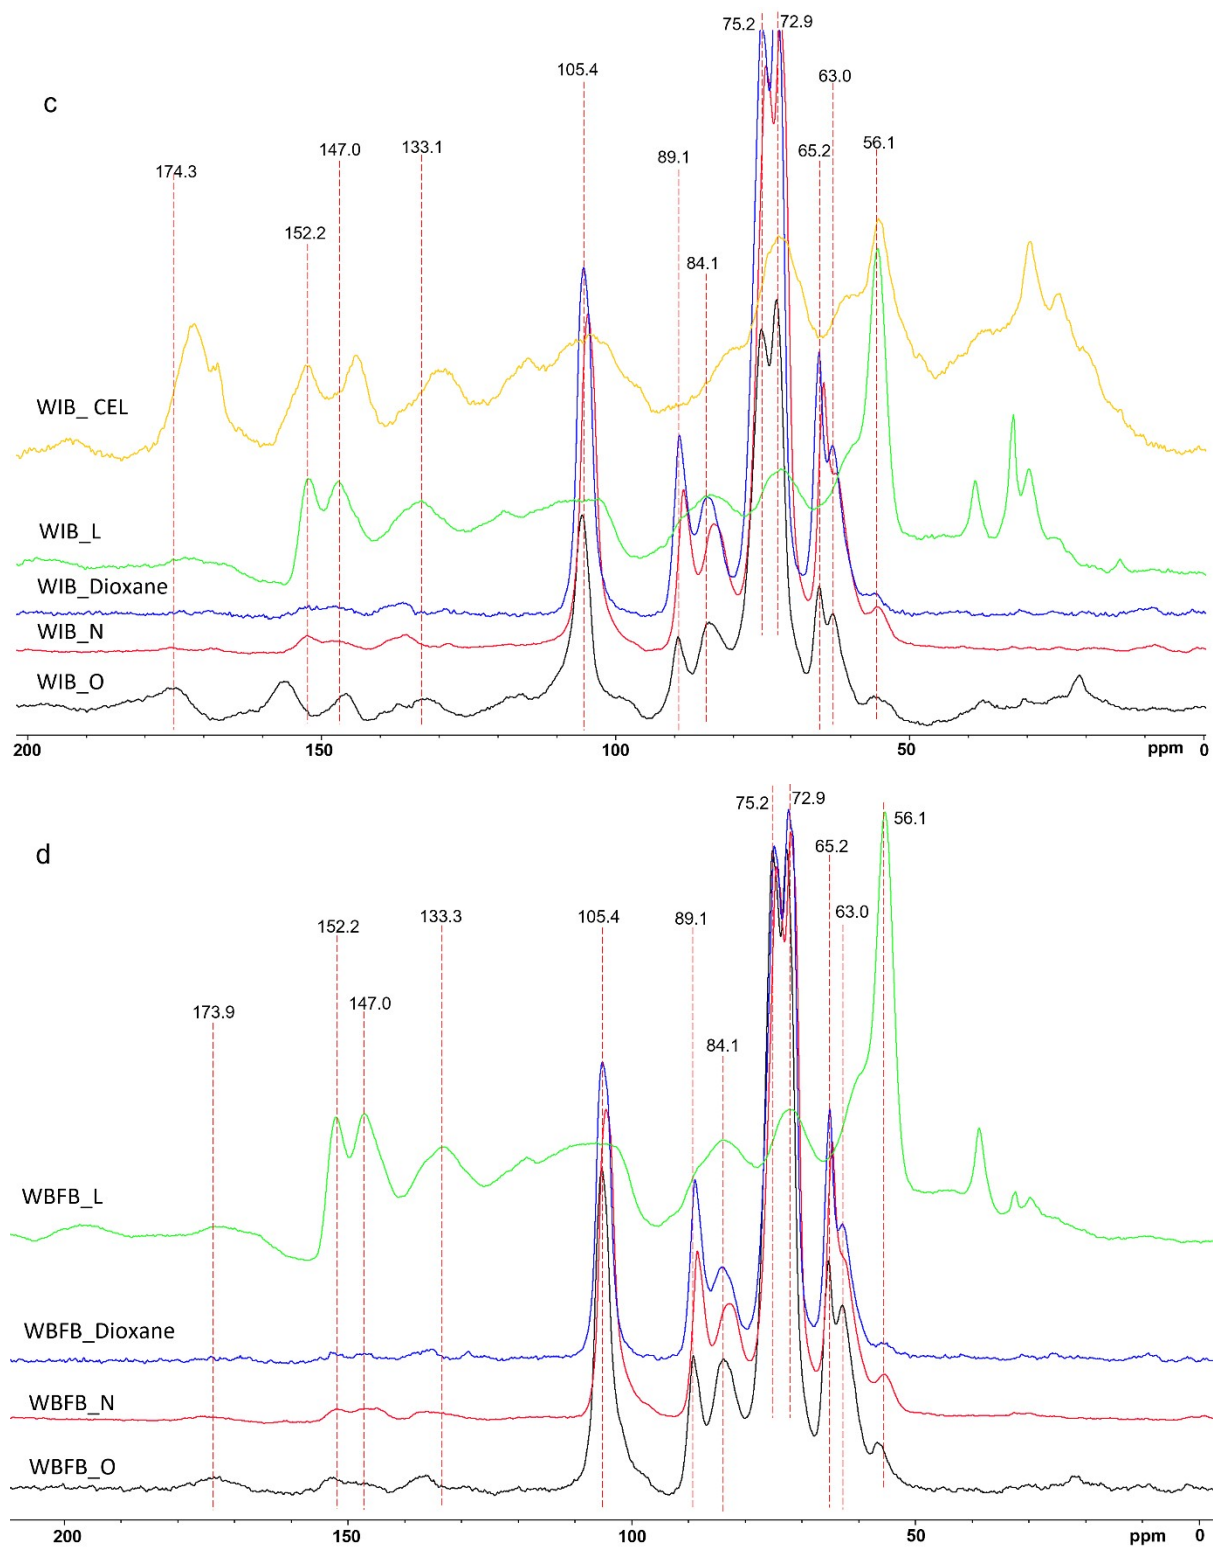

**Supplementary Fig. 20 CPMAS NMR spectrums of four different samples that are collected from their original form (O), 0.1M NaOH treated solid residue (N), solid residues after the dioxane extraction (Dioxane), and the recovered dioxane lignin (L). a Wood. b Bark. c Inner bark. d Fiber bundle. The cellulytic enzyme lignin (CEL) is also included as the reference for comparison.<sup>15</sup>**

a W W

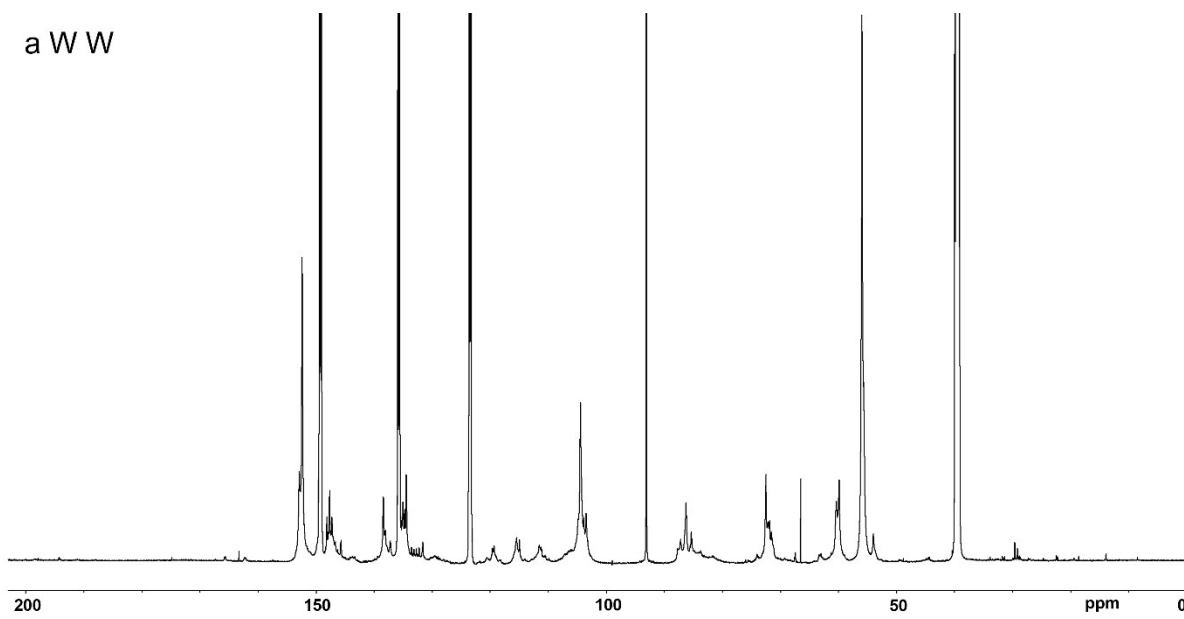

b W B

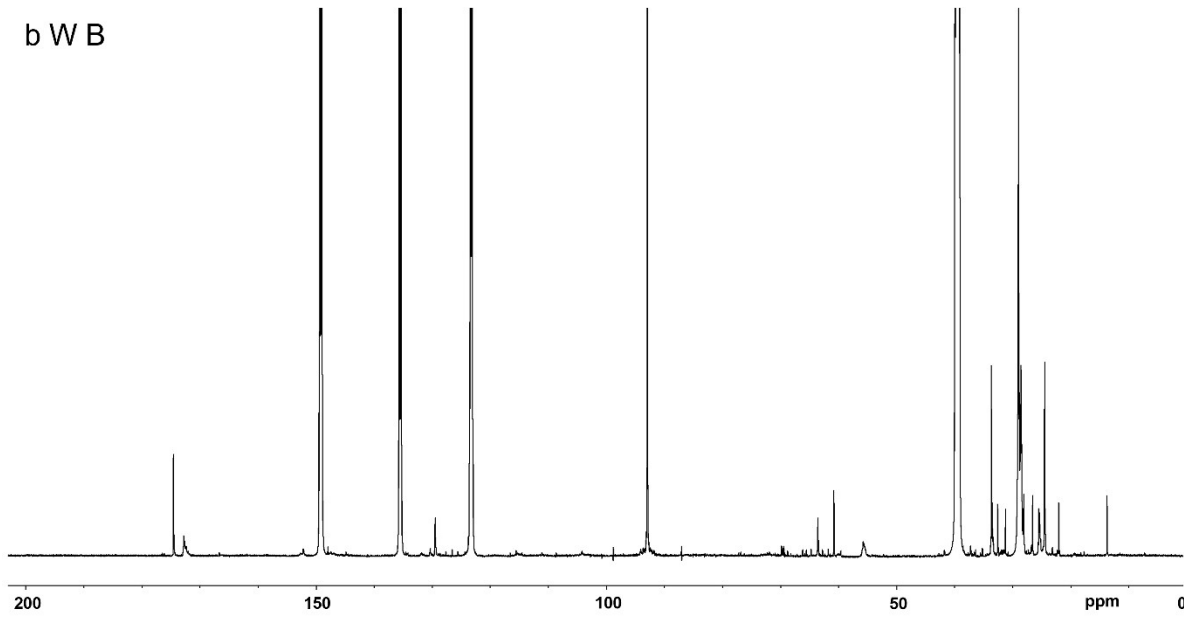

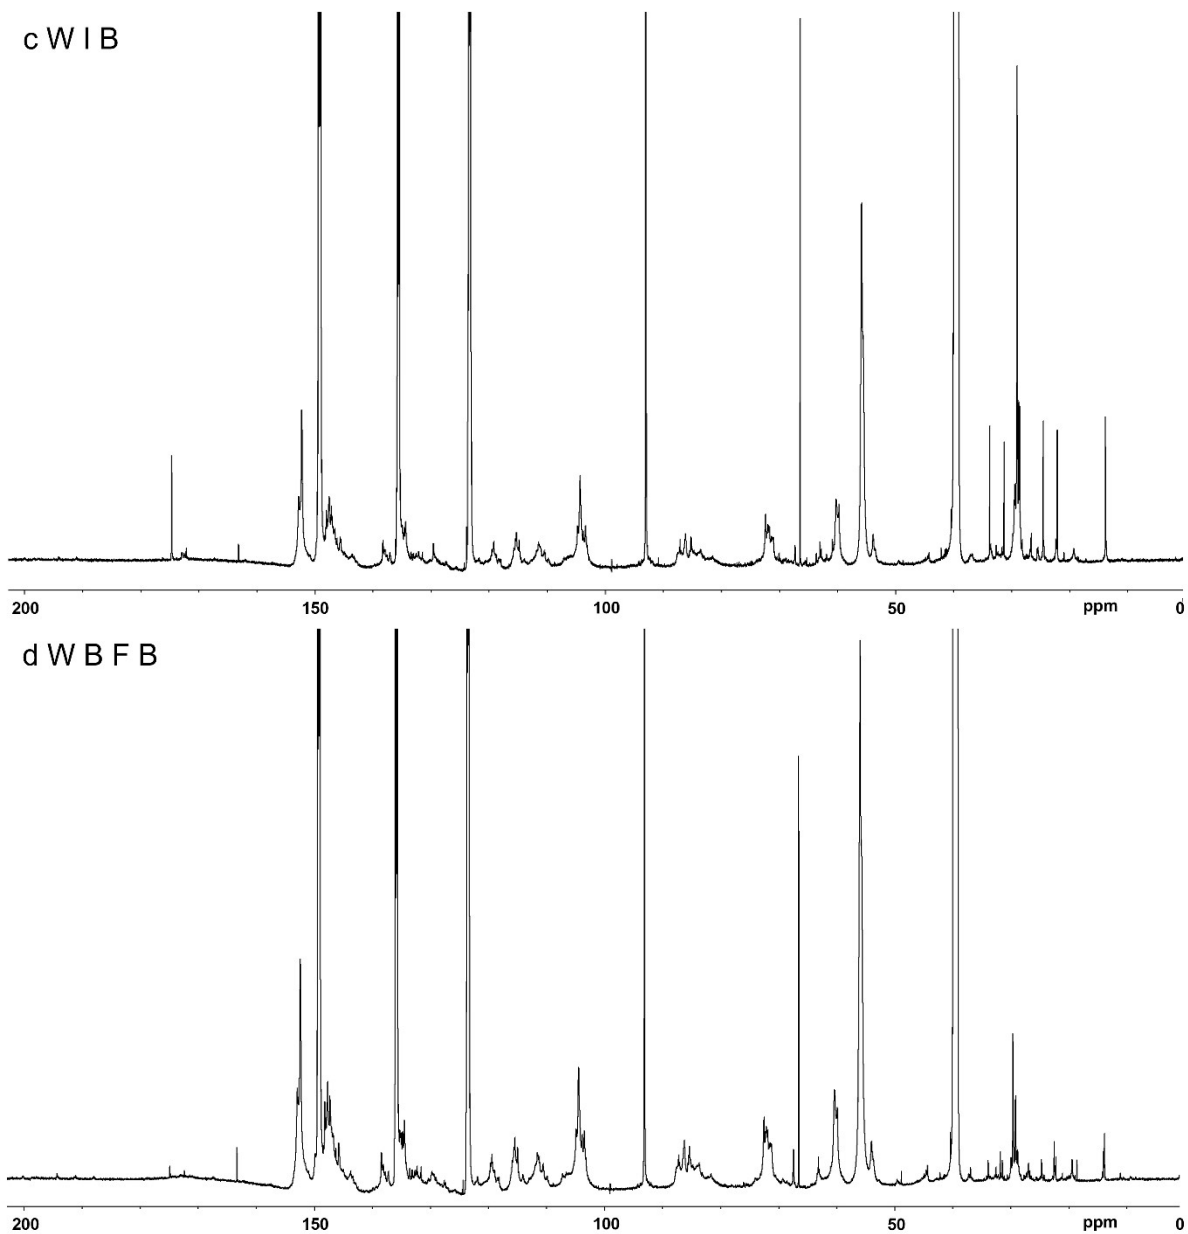

**Supplementary Fig. 21 Quantitative liquid state <sup>13</sup>C NMR spectrum of the recovered dioxane lignin (DMSO-*d*<sub>6</sub>/pyridine-*d*<sub>5</sub>, v/v 4/1; 1,3,5-trioxane as the internal standard). a Willow wood (WW). b Willow bark (WB). c Willow inner bark (WIB). d Willow bark fibre bundle (WB FB).**

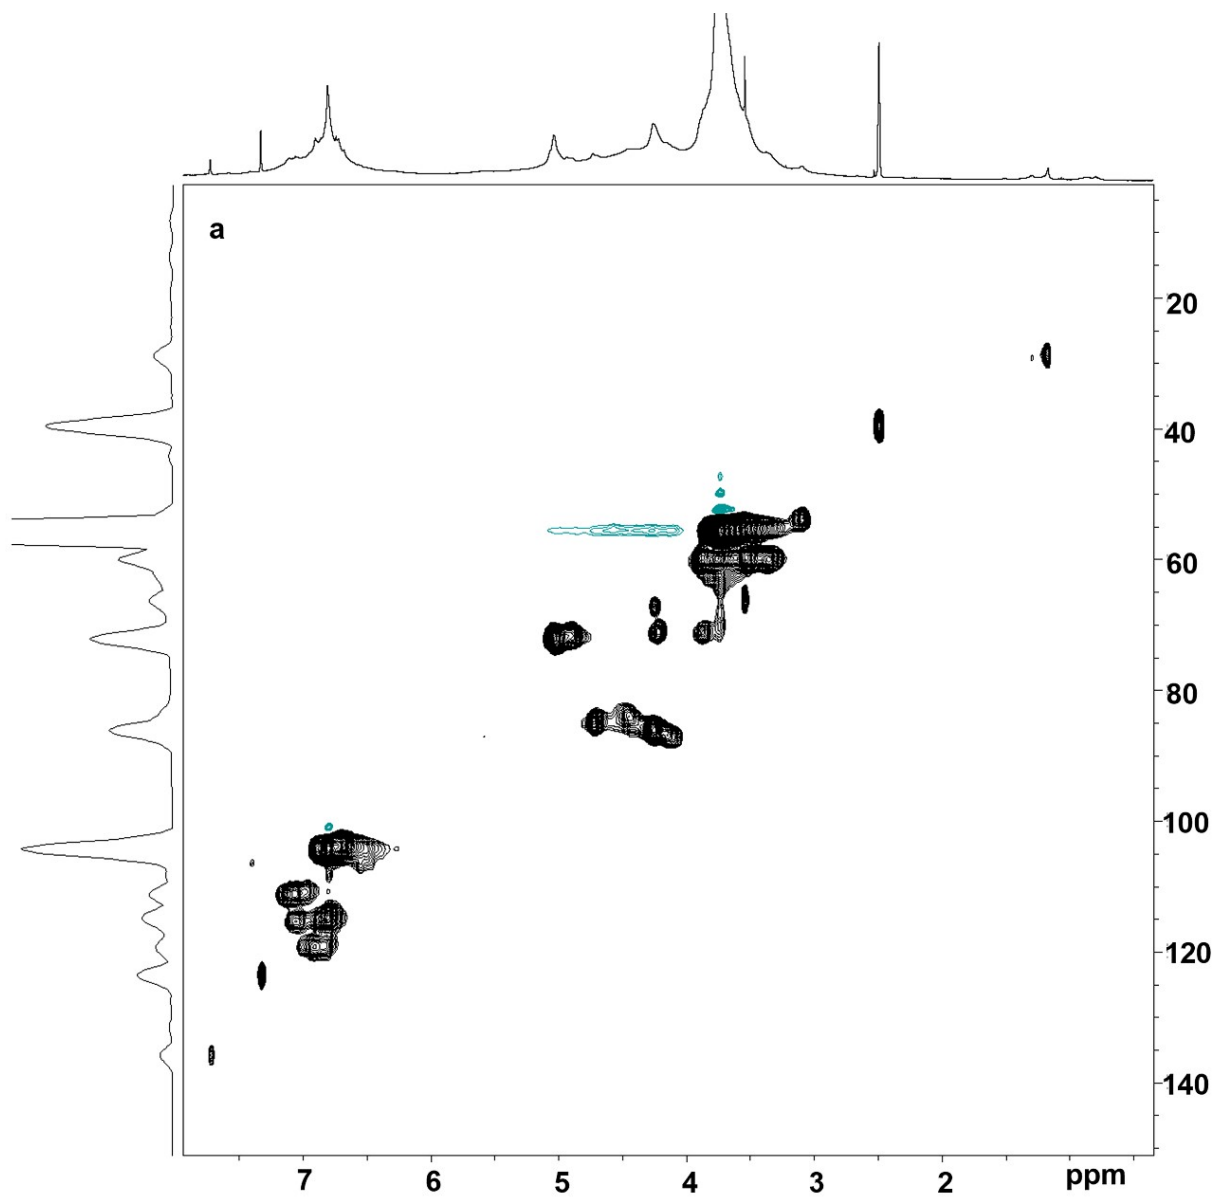



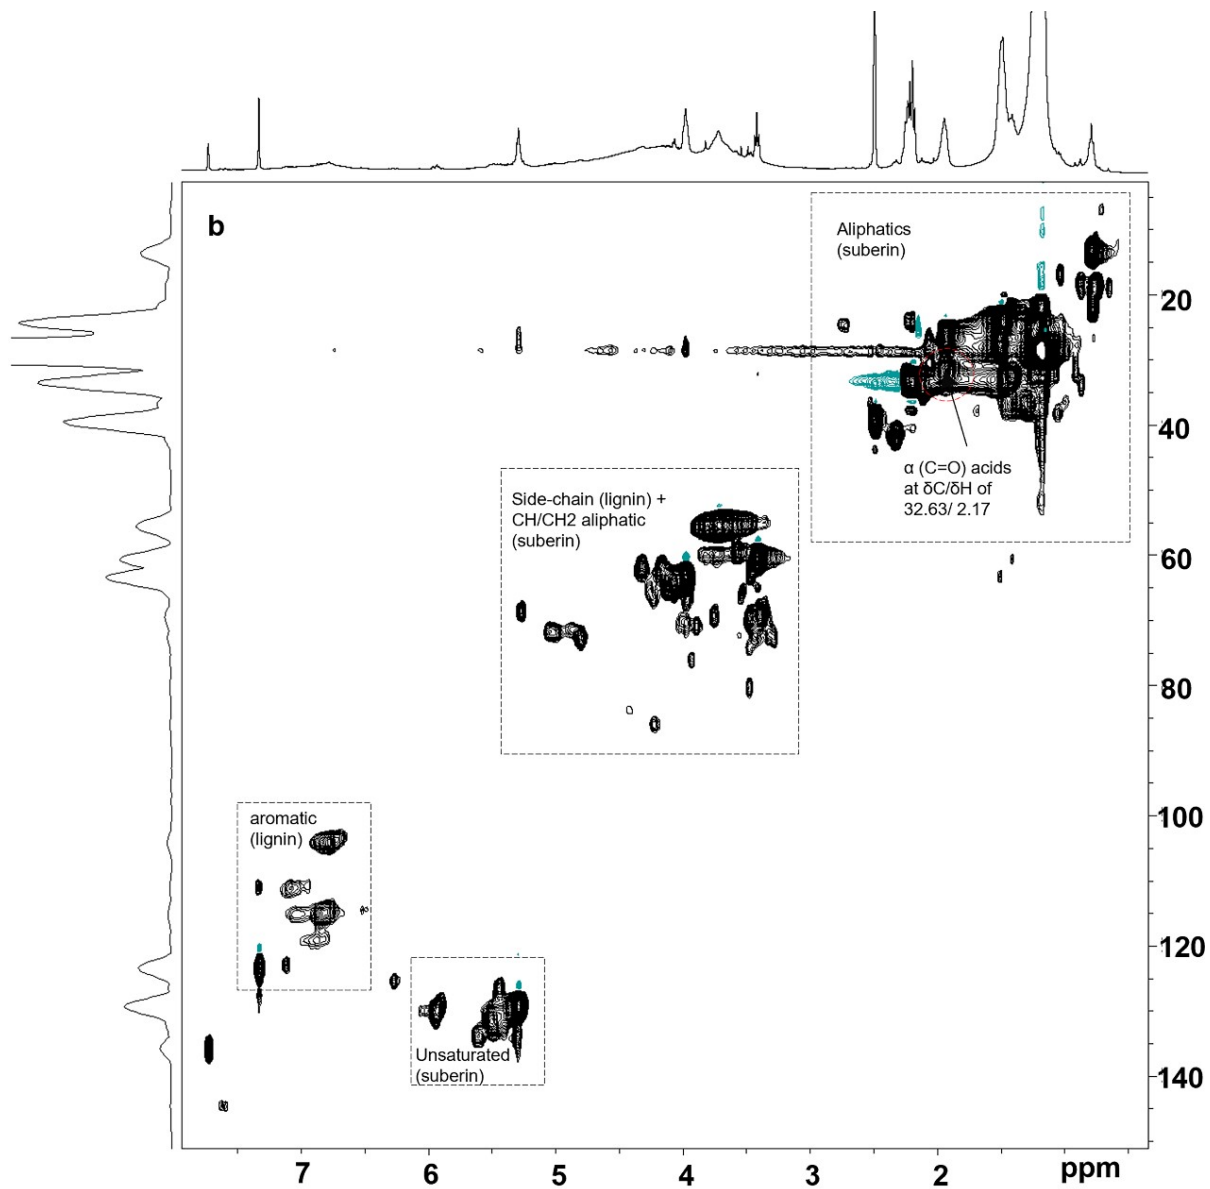

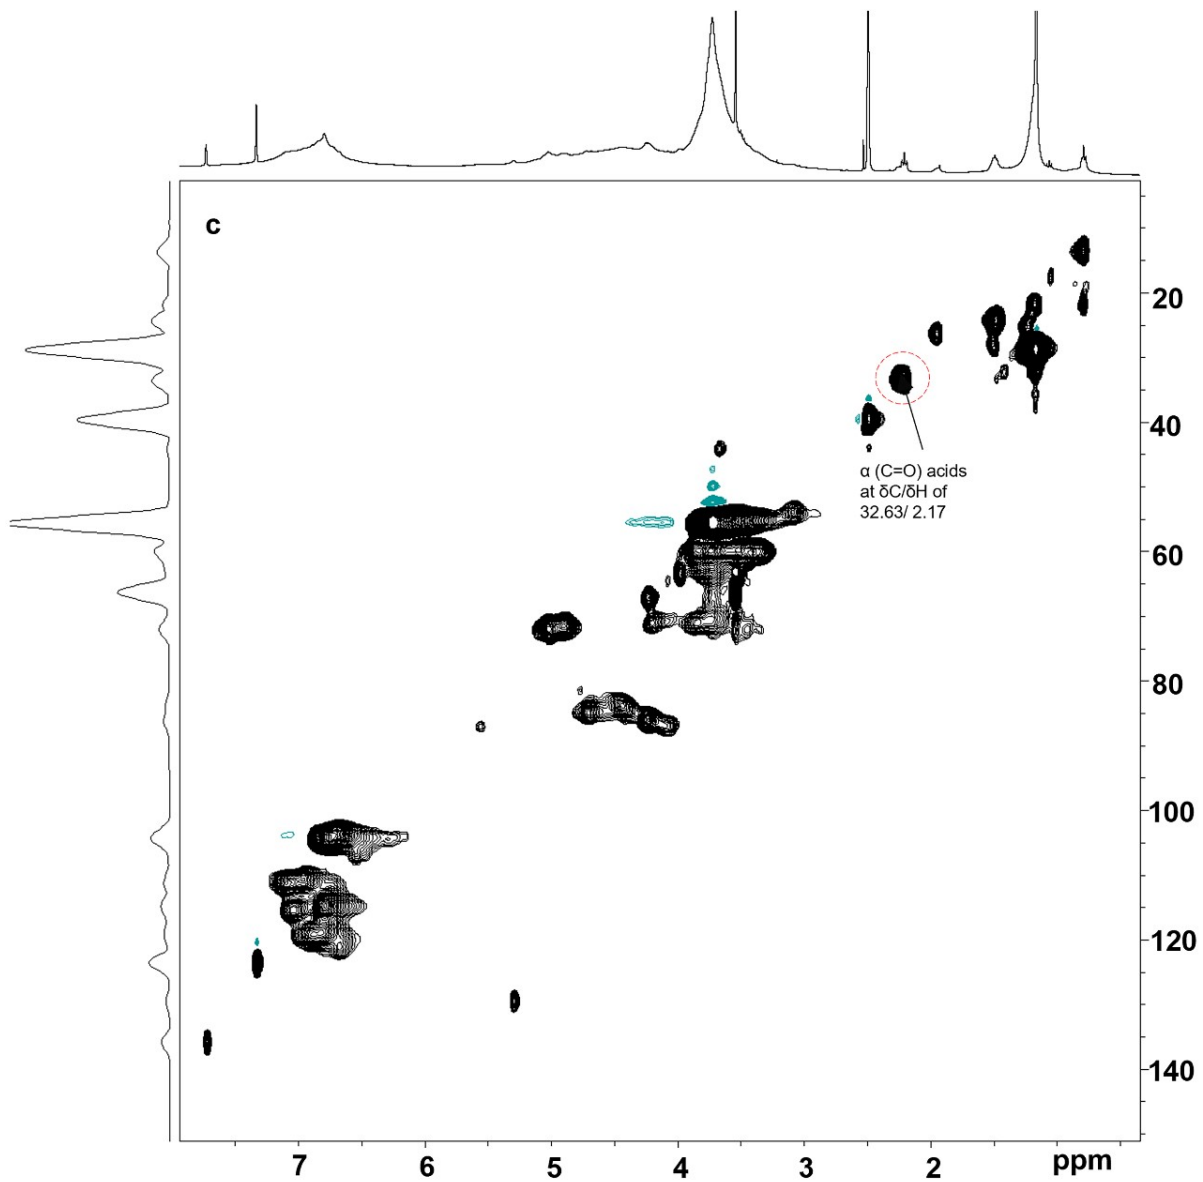

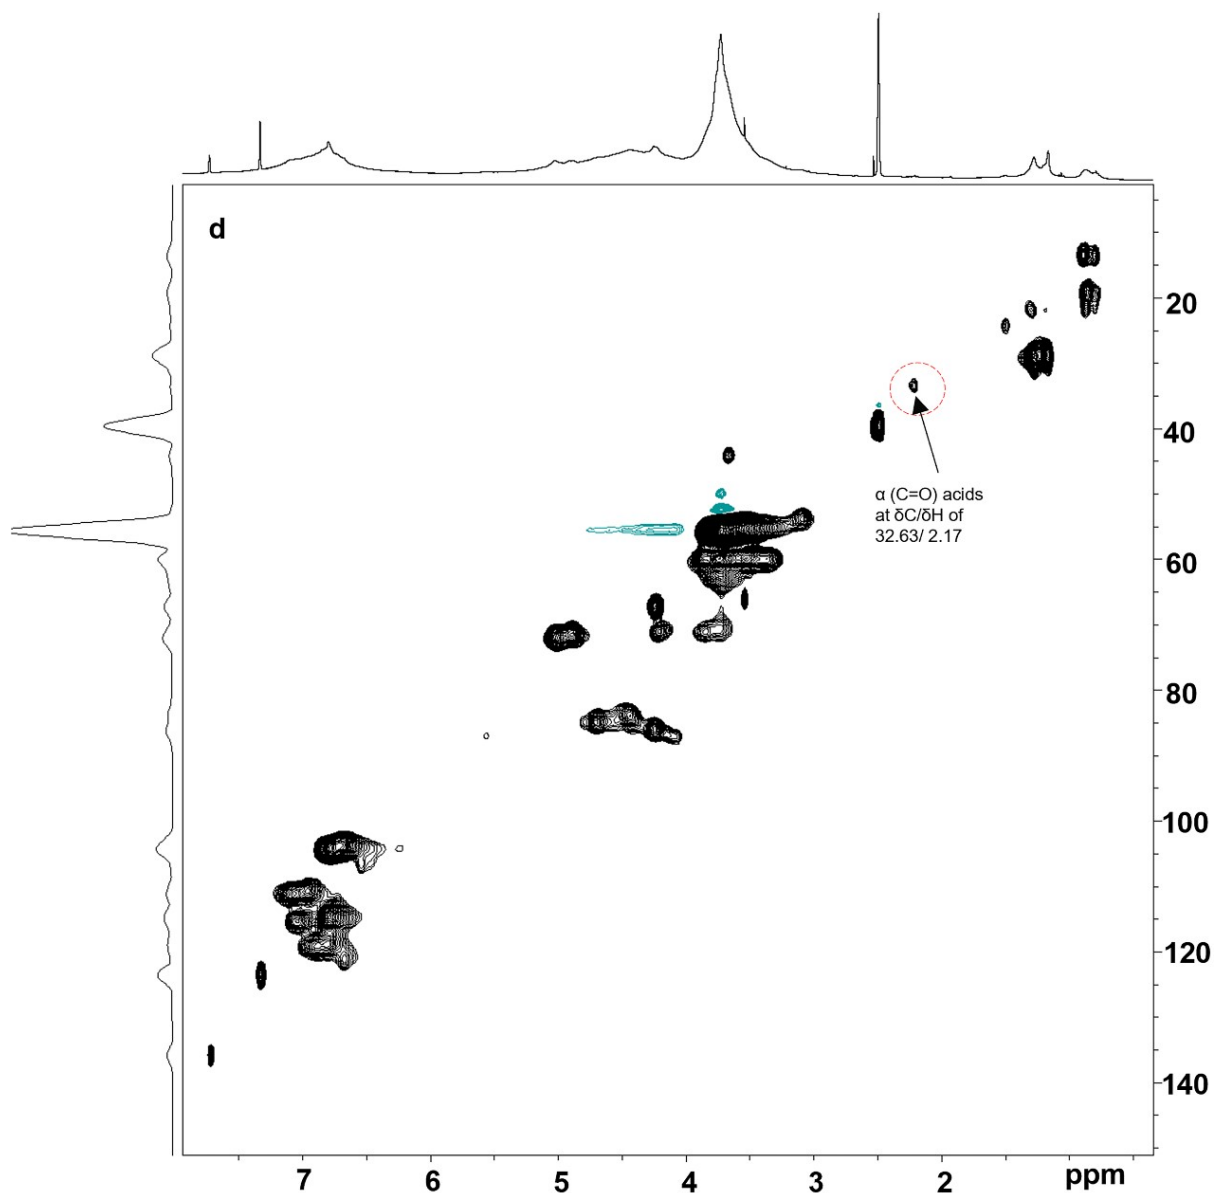

**Supplementary Fig. 22** HSQC NMR spectrum of the recovered dioxane lignin (DMSO-*d*6/pyridine-*d*5, v/v 4/1). **a** Willow wood (WW). **b** Willow bark (WB). **c** Willow inner bark (WIB). **d** Willow bark fibre bundle (WB FB).

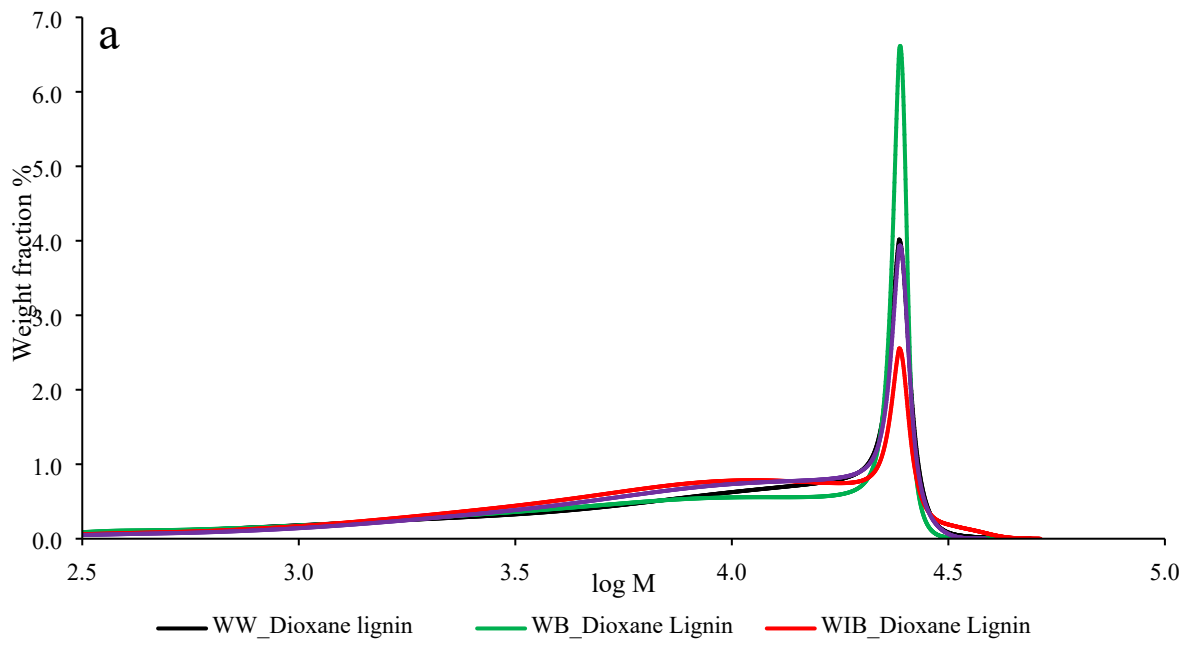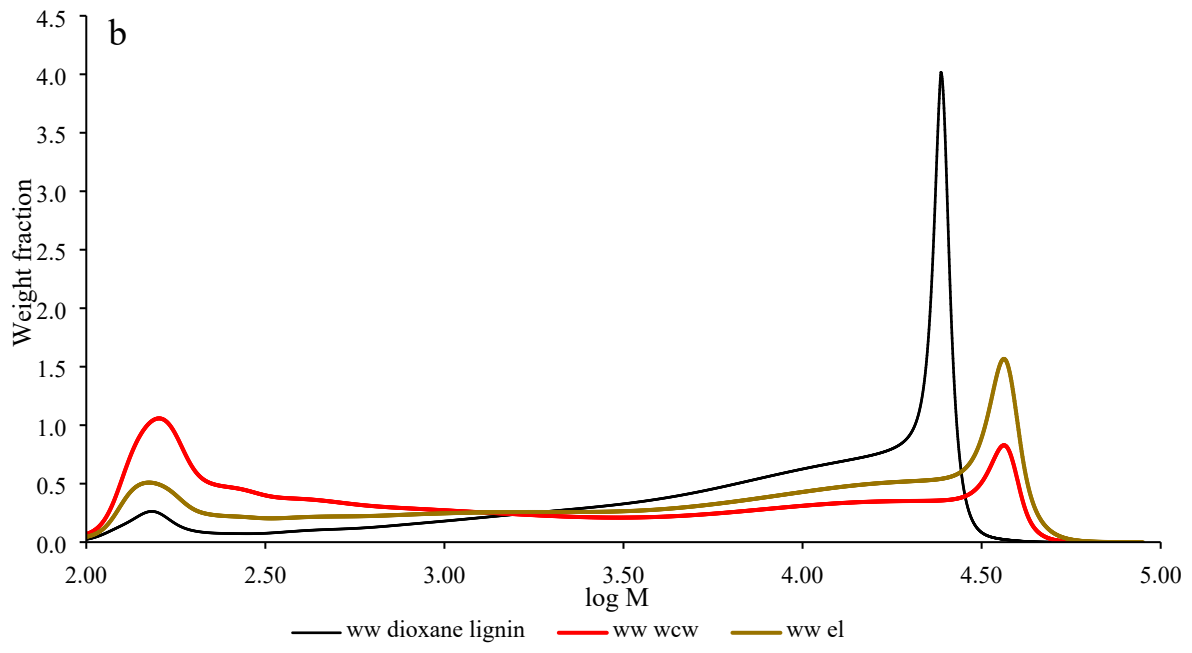

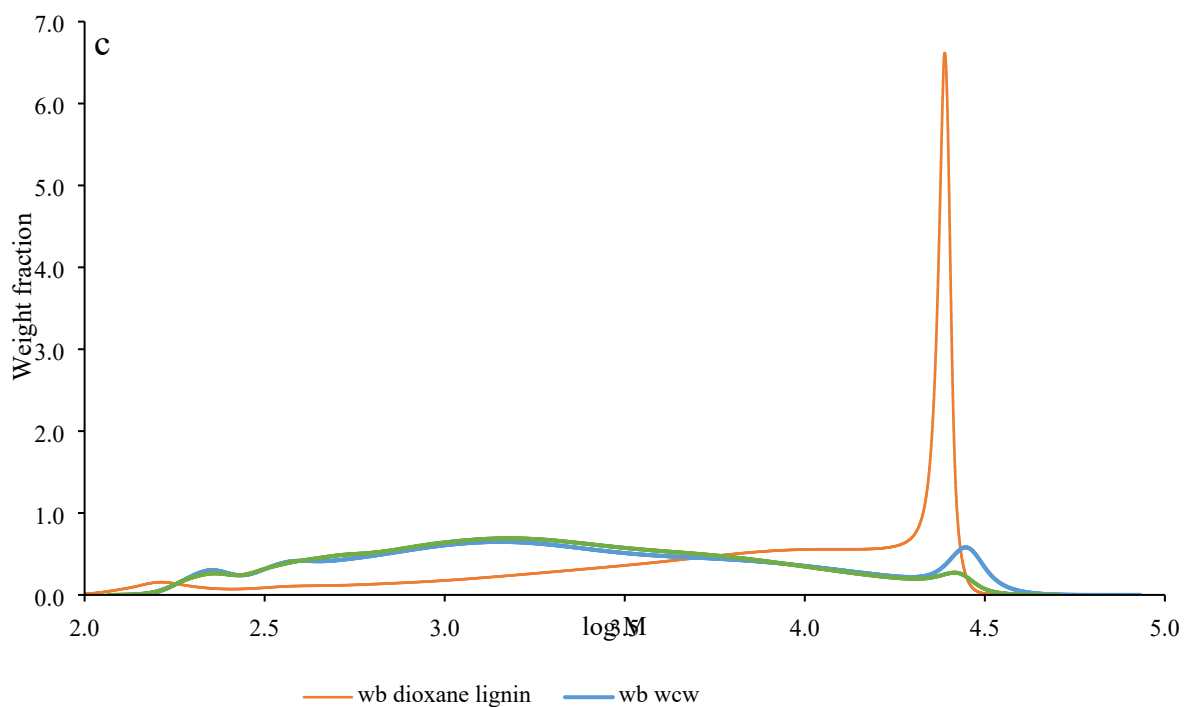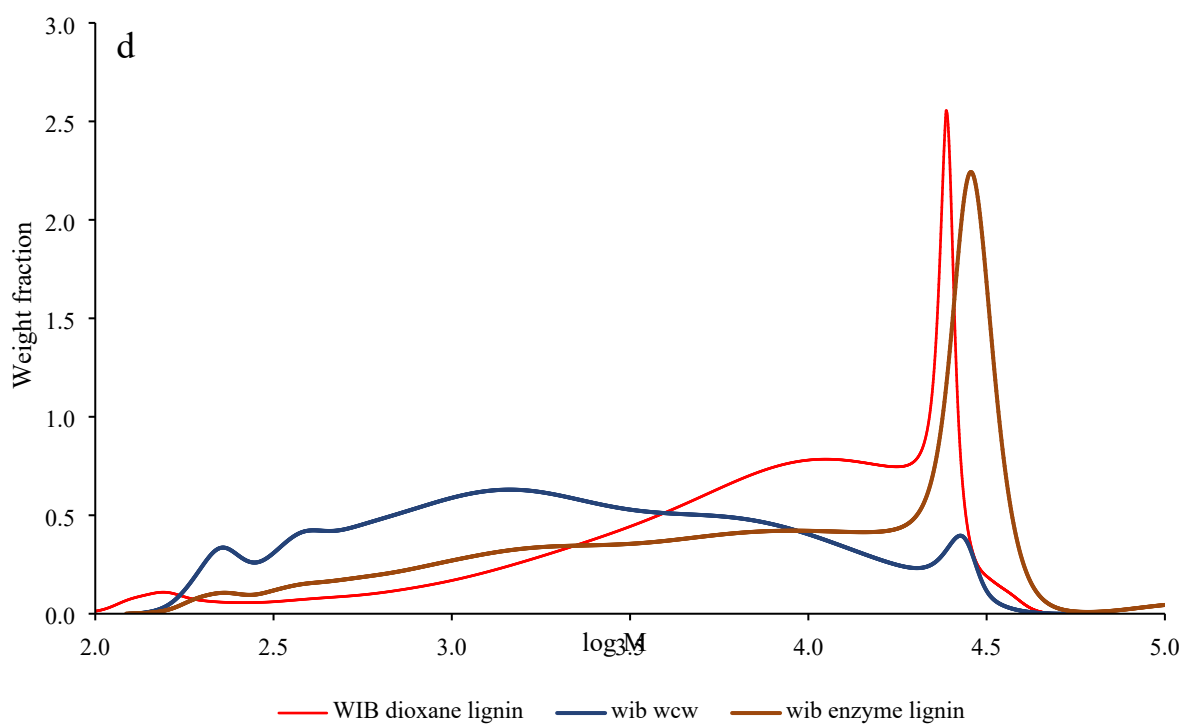

**Supplementary Fig. 23 The SEC elution profile of different lignin. a** Willow dioxane lignin (WW; WB; WIB; WBFB). **b** Different WW lignin (Dioxane lignin, CEL, and WCW). **c** Different WB lignin (Dioxane lignin, CEL, and WCW). **d** Different WIB lignin (Dioxane lignin, CEL, and WCW). For abbreviations, see **Supplementary Fig. 1–5**.

**Supplementary Table 13. Average molecular weight (g/mol) of the dioxane lignin fractions in comparison to the whole cell wall (WCW) and cellulytic enzyme lignin (CEL)<sup>15</sup> fractions from both hybrids of Klara and Karin.** Mn: number-average molecular weight; Mw: weight-average molecular weight which can be averaged according to the weight of molecules; Mp: peak maximum molar mass.

| source                        | sample                         | abbreviations | Mn    | Mw    | PDI  | Mp    |
|-------------------------------|--------------------------------|---------------|-------|-------|------|-------|
| This study                    | Klara WW dioxane Lignin        | WW_L          | 1575  | 12260 | 7.8  | 24330 |
| This study                    | Klara WB dioxane Lignin        | WB_L          | 1951  | 12740 | 6.5  | 24470 |
| This study                    | Klara WIB dioxane Lignin       | WIB_L         | 2187  | 11130 | 5.1  | 24370 |
| This study                    | Klara WB FB dioxane Lignin     | WBFB_L        | 2613  | 12370 | 4.7  | 24440 |
| Dou et al. 2017 <sup>15</sup> | Karin wood ww-wcw              | WW_WCW        | 365.2 | 7768  | 21.3 | 161.4 |
| Dou et al. 2017 <sup>15</sup> | Karin wood ww-el               | WW_CEL        | 699.3 | 12940 | 18.5 | 36400 |
| Dou et al. 2017 <sup>15</sup> | Karin bark WCW                 | WB_WCW        | 1059  | 5769  | 5.4  | 1437  |
| Dou et al. 2017 <sup>15</sup> | Karin bark enzyme lignin       | WB_CEL        | 1027  | 4348  | 4.2  | 1524  |
| Dou et al. 2017 <sup>15</sup> | Karin inner bark WCW           | WIB_WCW       | 1036  | 5040  | 4.9  | 1469  |
| Dou et al. 2017 <sup>15</sup> | Karin inner bark enzyme Lignin | WIB_CEL       | 2295  | 16340 | 7.1  | 28540 |

**Supplementary Table 14. The light green coloured cells indicate the tailored enzyme cocktail after screening and selection based on structural features of pectin and hemicellulose of willow wood (WW). Screening % refers to the percentages of candidate enzymes that can be ruled out theoretically based on structural characteristics of the substrate (i.e., WW). Literatures refer to Table 4.**

| Substrate (screening %)                                     | Specific area           | Cleaving glycosidic bond                                                                                          | Enzyme                                                         | EC number                                   | CAZy family                                                          | Abbreviation                                                                                      | Characteristics on the preferred structural features of the substrate                                                                                   |
|-------------------------------------------------------------|-------------------------|-------------------------------------------------------------------------------------------------------------------|----------------------------------------------------------------|---------------------------------------------|----------------------------------------------------------------------|---------------------------------------------------------------------------------------------------|---------------------------------------------------------------------------------------------------------------------------------------------------------|
| Pectin (84)                                                 | HG                      | cleave $\alpha$ -(1,4)-glycosidic bonds of GalpA backbone                                                         | polygalacturonase                                              | 3.2.1.67                                    | GH28                                                                 | Exo-PG                                                                                            | prefer non-esterified HG, show decreasing activity with increasing degree of methyl-esterification                                                      |
|                                                             |                         |                                                                                                                   |                                                                | 3.2.1.15                                    | GH28                                                                 | Endo-PG                                                                                           |                                                                                                                                                         |
|                                                             |                         |                                                                                                                   | polymethyl galacturonase                                       | 3.2.1.-                                     | GH28                                                                 | Endo-PMG                                                                                          | HG with at least 75% of the carboxyl groups are esterified                                                                                              |
|                                                             |                         |                                                                                                                   | pectate lyase                                                  | 4.2.2.2                                     | PL1/PL2/PL3/PL9/PL10                                                 | Endo-PGL                                                                                          | low methyl-esterified HG/non-esterified HG                                                                                                              |
|                                                             |                         |                                                                                                                   | pectin lyase                                                   | 4.2.2.10                                    | PL1                                                                  | Endo-PNL                                                                                          | highly methyl-esterified HG                                                                                                                             |
|                                                             |                         |                                                                                                                   | <b>xylogalacturonan hydrolase</b>                              | 3.2.1.-                                     | GH28                                                                 | Endo-XGH                                                                                          | <b>cleaves the <math>\beta</math>-Xylp substituted GalpA backbone, prefers to act between two xylosidated GalA units</b>                                |
|                                                             | HG (side chain)         | active on the side chains of HG                                                                                   | pectin methyl esterase                                         | 3.1.1.11                                    | CE8                                                                  | PME                                                                                               | esterified HG                                                                                                                                           |
|                                                             |                         |                                                                                                                   | pectin/rhamnogalacturonan acetyl esterase                      | 3.1.1.6                                     | CE12                                                                 | PAE, RGAE                                                                                         | acetylated HG/ acetylated RG                                                                                                                            |
|                                                             |                         |                                                                                                                   |                                                                | 3.1.1.86                                    | CE16                                                                 | PAE                                                                                               |                                                                                                                                                         |
|                                                             | RG-I                    | cleave $\alpha$ -(1,2) glycosidic bonds between D-GalpA and L-Rhap                                                | rhamnogalacturonan I hydrolase                                 | 3.2.1.171                                   | GH28                                                                 | Endo-RGH                                                                                          | activity is not hindered by galactose substitutions on the RG-I backbone                                                                                |
|                                                             |                         |                                                                                                                   | cleave $\alpha$ -(1,4) glycosidic bonds between Rhap and GalpA | rhamnogalacturonan lyase                    | 4.2.2.23                                                             | PL4                                                                                               | Endo-RGL                                                                                                                                                |
|                                                             |                         |                                                                                                                   |                                                                | 4.2.2.23                                    | PL11                                                                 | Endo-RGL                                                                                          | prefer RG-I backbone having galactan side chains without acetyl substitution                                                                            |
|                                                             |                         | cleave glycosidic bonds of arabinan/galactan                                                                      | endo- $\alpha$ -L-1,5-arabinanase                              | 3.2.1.99                                    | GH43                                                                 | Endo-Ara                                                                                          | random hydrolyzing $\alpha$ -(1,4)-glycosidic bonds of arabinan                                                                                         |
| endo- $\beta$ -1,4-galactanase                              |                         |                                                                                                                   | 3.2.1.89                                                       | GH53                                        | Endo-Gal                                                             | random hydrolyzing $\beta$ -(1,4)-glycosidic bonds of arabinogalactan I                           |                                                                                                                                                         |
| endo- $\beta$ -1,6-galactanase                              |                         |                                                                                                                   | 3.2.1.164                                                      | GH30                                        | Endo-Gal                                                             | random hydrolyzing $\beta$ -(1,6)-glycosidic bonds of arabinogalactan II                          |                                                                                                                                                         |
| hemicellulose (70)                                          |                         | xylan (main chain)                                                                                                | cleave $\beta$ -(1,4)-glycosidic bonds of xylan backbone       | <b>endo-1,4-<math>\beta</math>-xylanase</b> | 3.2.1.8                                                              | GH10                                                                                              | Endo-Xyn                                                                                                                                                |
|                                                             |                         |                                                                                                                   |                                                                | GH11                                        |                                                                      | <b>prefer unsubstituted xylan, require three unsubstituted consecutive Xylp</b>                   |                                                                                                                                                         |
|                                                             | arabinoxylanase         |                                                                                                                   |                                                                | 3.2.1.-                                     | GH5                                                                  |                                                                                                   | hydrolyzing arabinoxylan but does not attack unsubstituted xylan                                                                                        |
|                                                             |                         | glucuronoxylanase                                                                                                 | 3.2.1.136                                                      | GH30                                        |                                                                      | hydrolyzing glucuronoxylan but does not attack unsubstituted xylan                                |                                                                                                                                                         |
|                                                             | xylan (side chains)     | active on the side chains of xylan                                                                                | <b>acetyl xylan esterase</b>                                   | 3.1.1.72                                    | CE1                                                                  | AcXE                                                                                              | <b>action on 2,3-di-O-acetylated Xylp in xylan</b>                                                                                                      |
|                                                             |                         |                                                                                                                   |                                                                |                                             | CE3                                                                  |                                                                                                   | <b>deacetylated for O-2 or O-3 monoacetylated Xylp in xylan</b>                                                                                         |
|                                                             |                         |                                                                                                                   |                                                                |                                             | CE4                                                                  |                                                                                                   | <b>deacetylated effectively for singly 2- or 3-O-acetylated Xylp residues in xylan</b>                                                                  |
|                                                             |                         |                                                                                                                   |                                                                |                                             | CE5                                                                  |                                                                                                   | <b>prefer O-2 monoacetylated Xylp in xylan</b>                                                                                                          |
|                                                             |                         |                                                                                                                   |                                                                |                                             | CE6                                                                  |                                                                                                   | <b>deacetylated for 2,3-di-O-acetylated Xylp in xylan</b>                                                                                               |
|                                                             |                         |                                                                                                                   | $\alpha$ -L-arabinofuranosidase                                | 3.2.1.55                                    | GH43                                                                 | Abf                                                                                               | hydrolyzing (1 $\rightarrow$ 3)- $\alpha$ -l-arabinofuranosyl residues of doubly substituted xylopyranosyl residues in arabinoxylan                     |
|                                                             |                         |                                                                                                                   |                                                                |                                             | GH51                                                                 |                                                                                                   | release (1 $\rightarrow$ 2) and (1 $\rightarrow$ 3)- $\alpha$ -l-arabinofuranosyl residues from mono-substituted xylopyranosyl residues in arabinoxylan |
|                                                             |                         |                                                                                                                   |                                                                |                                             | GH54                                                                 |                                                                                                   | specific for O-3 linked arabinofuranosyl residues, Xylp is mono-substituted or di-substituted                                                           |
|                                                             | GH62                    | removing arabinofuranosyl residues linked in position O-2 or O-3 of mono-substituted xylose units in arabinoxylan |                                                                |                                             |                                                                      |                                                                                                   |                                                                                                                                                         |
|                                                             | $\alpha$ -glucuronidase | 3.2.1.139                                                                                                         | GH115                                                          |                                             | removing 4-O-methyl glucuronic acid side groups from polymeric xylan |                                                                                                   |                                                                                                                                                         |
|                                                             | mannan                  | cleave $\beta$ -(1,4)-glycosidic bonds of mannan backbone                                                         | endo- $\beta$ -1,4-mannanase                                   | 3.2.1.78                                    | GH5                                                                  | Man                                                                                               | prefer glucomannan                                                                                                                                      |
|                                                             |                         |                                                                                                                   |                                                                |                                             | GH26                                                                 |                                                                                                   | prefer galactomannan                                                                                                                                    |
| cleave T- $\alpha$ -(1,6)-glycosidic bonds of galactomannan |                         | $\alpha$ -galactosidase                                                                                           | 3.2.1.22                                                       | GH27                                        |                                                                      | removing the $\alpha$ -1,6-linked d-galactopyranosyl substituents attached to the mannan backbone |                                                                                                                                                         |

**Supplementary Table 15. The light green colored cells indicate the tailored enzyme cocktail after screening and selection based on structural features of pectin and hemicellulose of willow bark (WB). Screening % refers to the percentages of candidate enzymes that can be ruled out theoretically based on structural characteristics of the substrate (i.e., WB). Literatures refer to Table 4.**

| Substrate (screening %) | Specific area                                               | Cleaving glycosidic bond                                                                               | Enzyme                                                         | EC number                   | CAZy family          | Abbreviation                                                                                    | Characteristics on the preferred structural features of the substrate                                   |                                                                                                                                                         |
|-------------------------|-------------------------------------------------------------|--------------------------------------------------------------------------------------------------------|----------------------------------------------------------------|-----------------------------|----------------------|-------------------------------------------------------------------------------------------------|---------------------------------------------------------------------------------------------------------|---------------------------------------------------------------------------------------------------------------------------------------------------------|
| Pectin (58)             | HG                                                          | cleave $\alpha$ -(1,4)-glycosidic bonds of GalpA backbone                                              | polygalacturonase                                              | 3.2.1.67                    | GH28                 | Exo-PG                                                                                          | prefer non-esterified HG, show decreasing activity with increasing degree of methyl-esterification      |                                                                                                                                                         |
|                         |                                                             |                                                                                                        |                                                                | 3.2.1.15                    | GH28                 | Endo-PG                                                                                         |                                                                                                         |                                                                                                                                                         |
|                         |                                                             |                                                                                                        | polymethyl galacturonase                                       | 3.2.1.-                     | GH28                 | Endo-PMG                                                                                        | HG with at least 75% of the carboxyl groups are esterified                                              |                                                                                                                                                         |
|                         |                                                             |                                                                                                        | pectate lyase                                                  | 4.2.2.2                     | PL1/PL2/PL3/PL9/PL10 | Endo-PGL                                                                                        | low methyl-esterified HG/non-esterified HG                                                              |                                                                                                                                                         |
|                         |                                                             |                                                                                                        | pectin lyase                                                   | 4.2.2.10                    | PL1                  | Endo-PNL                                                                                        | highly methyl-esterified HG                                                                             |                                                                                                                                                         |
|                         |                                                             |                                                                                                        | xylogalacturonan hydrolase                                     | 3.2.1.-                     | GH28                 | Endo-XGH                                                                                        | cleaves the $\beta$ -Xylp substituted GalpA backbone, prefers to act between two xylosidated GalA units |                                                                                                                                                         |
|                         | HG (side chain)                                             | active on the side chains of HG                                                                        | pectin methyl esterase                                         | 3.1.1.11                    | CE8                  | PME                                                                                             | esterified HG                                                                                           |                                                                                                                                                         |
|                         |                                                             |                                                                                                        | pectin/rhamnogalacturonan acetyl esterase                      | 3.1.1.6                     | CE12                 | PAE, RGAE                                                                                       | acetylated HG/ acetylated RG                                                                            |                                                                                                                                                         |
|                         |                                                             |                                                                                                        |                                                                | 3.1.1.86                    | CE16                 | PAE                                                                                             |                                                                                                         |                                                                                                                                                         |
|                         | RG-I                                                        | cleave $\alpha$ -(1,2) glycosidic bonds between D-GalpA and L-Rhap                                     | rhamnogalacturonan I hydrolase                                 | 3.2.1.171                   | GH28                 | Endo-RGH                                                                                        | activity is not hindered by galactose substitutions on the RG-I backbone                                |                                                                                                                                                         |
|                         |                                                             |                                                                                                        | cleave $\alpha$ -(1,4) glycosidic bonds between Rhap and GalpA | rhamnogalacturonan lyase    | 4.2.2.23             | PL4                                                                                             | Endo-RGL                                                                                                | activity is increased by removal of acetyl groups and Ara side chains, decreased by removal of Gal side chains                                          |
|                         |                                                             |                                                                                                        |                                                                | 4.2.2.23                    | PL11                 | Endo-RGL                                                                                        | prefer RG-I backbone having galactan side chains without acetyl substitution                            |                                                                                                                                                         |
|                         |                                                             | cleave glycosidic bonds of arabinan/galactan                                                           | endo- $\alpha$ -L-1,5-arabinanase                              | 3.2.1.99                    | GH43                 | Endo-Ara                                                                                        | random hydrolyzing $\alpha$ -(1,4)-glycosidic bonds of arabinan                                         |                                                                                                                                                         |
|                         |                                                             |                                                                                                        | endo- $\beta$ -1,4-galactanase                                 | 3.2.1.89                    | GH53                 | Endo-Gal                                                                                        | random hydrolyzing $\beta$ -(1,4)-glycosidic bonds of arabinogalactan I                                 |                                                                                                                                                         |
|                         |                                                             |                                                                                                        | endo- $\beta$ -1,6-galactanase                                 | 3.2.1.164                   | GH30                 | Endo-Gal                                                                                        | random hydrolyzing $\beta$ -(1,6)-glycosidic bonds of arabinogalactan II                                |                                                                                                                                                         |
|                         | hemicellulose (35)                                          | xylan (main chain)                                                                                     | cleave $\beta$ -(1,4)-glycosidic bonds of xylan backbone       | endo-1,4- $\beta$ -xylanase | 3.2.1.8              | GH10                                                                                            | Endo-Xyn                                                                                                | require two unsubstituted consecutive Xylp, higher tolerance to substituents than GH10                                                                  |
|                         |                                                             |                                                                                                        |                                                                |                             |                      | GH11                                                                                            |                                                                                                         | prefer unsubstituted xylan, require three unsubstituted consecutive Xylp                                                                                |
|                         |                                                             |                                                                                                        |                                                                | arabinoxylanase             | 3.2.1.-              | GH5                                                                                             |                                                                                                         | hydrolyzing arabinoxylan but not attack unsubstituted xylan                                                                                             |
|                         |                                                             | glucuronoxylanase                                                                                      | 3.2.1.136                                                      | GH30                        |                      | hydrolyzing glucuronoxylan but not attack unsubstituted xylan                                   |                                                                                                         |                                                                                                                                                         |
| xylan (side chains)     |                                                             | active on the side chains of xylan                                                                     | acetyl xylan esterase                                          |                             | 3.1.1.72             | CE1                                                                                             | AcXE                                                                                                    | action on 2,3-di-O-acetylated Xylp in xylan                                                                                                             |
|                         |                                                             |                                                                                                        |                                                                |                             |                      | CE3                                                                                             |                                                                                                         | deacetylated for O-2 or O-3 monoacetylated Xylp in xylan                                                                                                |
|                         |                                                             |                                                                                                        |                                                                |                             |                      | CE4                                                                                             |                                                                                                         | deacetylated effectively for singly 2- or 3-O-acetylated Xylp residues in xylan                                                                         |
|                         |                                                             |                                                                                                        |                                                                |                             |                      | CE5                                                                                             |                                                                                                         | prefer O-2 monoacetylated Xylp in xylan                                                                                                                 |
|                         |                                                             |                                                                                                        |                                                                |                             |                      | CE6                                                                                             |                                                                                                         | deacetylated for 2,3-di-O-acetylated Xylp in xylan                                                                                                      |
|                         |                                                             |                                                                                                        | $\alpha$ -L-arabinofuranosidase                                |                             | 3.2.1.55             | GH43                                                                                            | Abf                                                                                                     | hydrolyzing (1 $\rightarrow$ 3)- $\alpha$ -L-arabinofuranosyl residues of doubly substituted xylopyranosyl in arabinoxylan                              |
|                         |                                                             |                                                                                                        |                                                                |                             |                      | GH51                                                                                            |                                                                                                         | release (1 $\rightarrow$ 2) and (1 $\rightarrow$ 3)- $\alpha$ -L-arabinofuranosyl residues from mono-substituted xylopyranosyl residues in arabinoxylan |
|                         |                                                             |                                                                                                        |                                                                |                             |                      | GH54                                                                                            |                                                                                                         | specific for O-3 linked arabinofuranosyl residues, Xylp is mono-substituted or di-substituted                                                           |
| GH62                    |                                                             | remove arabinofuranosyl residues linked in O-2 or O-3 of mono-substituted xylose units in arabinoxylan |                                                                |                             |                      |                                                                                                 |                                                                                                         |                                                                                                                                                         |
| $\alpha$ -glucuronidase |                                                             |                                                                                                        | 3.2.1.139                                                      | GH115                       |                      | remove 4-O-methyl glucuronic acid side groups from polymeric xylan                              |                                                                                                         |                                                                                                                                                         |
| mannan                  |                                                             | cleave $\beta$ -(1,4)-glycosidic bonds of mannan                                                       | endo- $\beta$ -1,4-mannanase                                   | 3.2.1.78                    | GH5                  | Man                                                                                             | prefer glucomannan                                                                                      |                                                                                                                                                         |
|                         |                                                             |                                                                                                        |                                                                | GH26                        | prefer galactomannan |                                                                                                 |                                                                                                         |                                                                                                                                                         |
|                         | cleave T- $\alpha$ -(1,6)-glycosidic bonds of galactomannan | $\alpha$ -galactosidase                                                                                | 3.2.1.22                                                       | GH27                        |                      | remove the $\alpha$ -1,6-linked d-galactopyranosyl substituents attached to the mannan backbone |                                                                                                         |                                                                                                                                                         |



**Supplementary Table 16. The light green colored cells indicate the tailored enzyme cocktail after screening and selection based on structural features of pectin and hemicellulose of willow bark fiber bundle (WBFB). Screening % refers to the percentages of candidate enzymes that can be ruled out theoretically based on structural characteristics of the substrate (i.e., WBFB). Literatures refer to Table 4.**

| Substrate (screening %) | Specific area                                               | Cleaving glycosidic bond                                                             | Enzyme                                                                                                   | EC number                   | CAZy family                                   | Abbreviation                                                                                      | Characteristics on the preferred structural features of the substrate                                   |                                                                                                                                                  |
|-------------------------|-------------------------------------------------------------|--------------------------------------------------------------------------------------|----------------------------------------------------------------------------------------------------------|-----------------------------|-----------------------------------------------|---------------------------------------------------------------------------------------------------|---------------------------------------------------------------------------------------------------------|--------------------------------------------------------------------------------------------------------------------------------------------------|
| Pectin (63)             | HG                                                          | cleave $\alpha$ -(1,4)-glycosidic bonds of GalpA backbone                            | polygalacturonase                                                                                        | 3.2.1.67                    | GH28                                          | Exo-PG                                                                                            | prefer non-esterified HG, show decreasing activity with increasing degree of methyl-esterification      |                                                                                                                                                  |
|                         |                                                             |                                                                                      |                                                                                                          | 3.2.1.15                    | GH28                                          | Endo-PG                                                                                           |                                                                                                         |                                                                                                                                                  |
|                         |                                                             |                                                                                      | polymethyl galacturonase                                                                                 | 3.2.1.-                     | GH28                                          | Endo-PMG                                                                                          | HG with at least 75% of the carboxyl groups are esterified                                              |                                                                                                                                                  |
|                         |                                                             |                                                                                      | pectate lyase                                                                                            | 4.2.2.2                     | PL1/PL2/PL3/PL9/PL10                          | Endo-PGL                                                                                          | low methyl-esterified HG/non-esterified HG                                                              |                                                                                                                                                  |
|                         |                                                             |                                                                                      | pectin lyase                                                                                             | 4.2.2.10                    | PL1                                           | Endo-PNL                                                                                          | highly methyl-esterified HG                                                                             |                                                                                                                                                  |
|                         |                                                             |                                                                                      | xylogalacturonan hydrolase                                                                               | 3.2.1.-                     | GH28                                          | Endo-XGH                                                                                          | cleaves the $\beta$ -Xylp substituted GalpA backbone, prefers to act between two xylosidated GalA units |                                                                                                                                                  |
|                         | HG (side chain)                                             | active on the side chains of HG                                                      | pectin methyl esterase                                                                                   | 3.1.1.11                    | CE8                                           | PME                                                                                               | esterified HG                                                                                           |                                                                                                                                                  |
|                         |                                                             |                                                                                      | pectin/rhamnogalacturonan acetyl esterase                                                                | 3.1.1.6                     | CE12                                          | PAE, RGAE                                                                                         | acetylated HG/ acetylated RG                                                                            |                                                                                                                                                  |
|                         |                                                             |                                                                                      |                                                                                                          | 3.1.1.86                    | CE16                                          | PAE                                                                                               |                                                                                                         |                                                                                                                                                  |
|                         | RG-I                                                        | cleave $\alpha$ -(1,2) glycosidic bonds between D-GalpA and L-Rhap                   | rhamnogalacturonan I hydrolase                                                                           | 3.2.1.171                   | GH28                                          | Endo-RGH                                                                                          | activity is not hindered by galactose substitutions on the RG-I backbone                                |                                                                                                                                                  |
|                         |                                                             |                                                                                      | cleave $\alpha$ -(1,4) glycosidic bonds between Rhap and GalpA                                           | rhamnogalacturonan lyase    | 4.2.2.23                                      | PL4                                                                                               | Endo-RGL                                                                                                | activity is increased by removal of acetyl groups and Ara side chains, decreased by removal of Gal side chains                                   |
|                         |                                                             |                                                                                      |                                                                                                          | 4.2.2.23                    | PL11                                          | Endo-RGL                                                                                          | prefer RGI backbone having galactan side chains without acetyl substitution                             |                                                                                                                                                  |
|                         |                                                             | cleave glycosidic bonds of arabinan/galactan                                         | endo- $\alpha$ -L-1,5-arabinanase                                                                        | 3.2.1.99                    | GH43                                          | Endo-Ara                                                                                          | random hydrolyzing $\alpha$ -(1,4)-glycosidic bonds of arabinan                                         |                                                                                                                                                  |
|                         |                                                             |                                                                                      | endo- $\beta$ -1,4-galactanase                                                                           | 3.2.1.89                    | GH53                                          | Endo-Gal                                                                                          | random hydrolyzing $\beta$ -(1,4)-glycosidic bonds of arabinogalactan I                                 |                                                                                                                                                  |
|                         |                                                             |                                                                                      | endo- $\beta$ -1,6-galactanase                                                                           | 3.2.1.164                   | GH30                                          | Endo-Gal                                                                                          | random hydrolyzing $\beta$ -(1,6)-glycosidic bonds of arabinogalactan II                                |                                                                                                                                                  |
|                         | hemicellulose (88)                                          | xylan (main chain)                                                                   | cleave $\beta$ -(1,4)-glycosidic bonds of xylan backbone                                                 | endo-1,4- $\beta$ -xylanase | 3.2.1.8                                       | GH10                                                                                              | Endo-Xyn                                                                                                | require two unsubstituted consecutive Xylp, higher tolerance to substituents than GH10                                                           |
|                         |                                                             |                                                                                      |                                                                                                          |                             |                                               | GH11                                                                                              |                                                                                                         | prefer unsubstituted xylan, require three unsubstituted consecutive Xylp                                                                         |
|                         |                                                             |                                                                                      |                                                                                                          | arabinoxylanase             | 3.2.1.-                                       | GH5                                                                                               |                                                                                                         | hydrolyzing arabinoxylan but does not attack unsubstituted xylan                                                                                 |
|                         |                                                             | glucuronoxylanase                                                                    | 3.2.1.136                                                                                                | GH30                        |                                               | hydrolyzing glucuronoxylan but does not attack unsubstituted xylan                                |                                                                                                         |                                                                                                                                                  |
| xylan (side chains)     |                                                             | active on the side chains of xylan                                                   | acetyl xylan esterase                                                                                    |                             | 3.1.1.72                                      | CE1                                                                                               | AcXE                                                                                                    | action on 2,3-di-O-acetylated Xylp in xylan                                                                                                      |
|                         |                                                             |                                                                                      |                                                                                                          |                             |                                               | CE3                                                                                               |                                                                                                         | deacetylated for O-2 or O-3 monoacetylated Xylp in xylan                                                                                         |
|                         |                                                             |                                                                                      |                                                                                                          |                             |                                               | CE4                                                                                               |                                                                                                         | deacetylated effectively for singly 2- or 3-O-acetylated Xylp residues in xylan                                                                  |
|                         |                                                             |                                                                                      |                                                                                                          |                             |                                               | CE5                                                                                               |                                                                                                         | prefer O-2 monoacetylated Xylp in xylan                                                                                                          |
|                         |                                                             |                                                                                      |                                                                                                          |                             |                                               | CE6                                                                                               |                                                                                                         | deacetylated for 2,3-di-O-acetylated Xylp in xylan                                                                                               |
|                         |                                                             |                                                                                      | $\alpha$ -L-arabinofuranosidase                                                                          |                             | 3.2.1.55                                      | GH43                                                                                              | Abf                                                                                                     | hydrolyzing (1 $\rightarrow$ 3)- $\alpha$ -L-arabinofuranosyl residues of doubly substituted xylopyranosyl residues in arabinoxylan              |
|                         |                                                             |                                                                                      |                                                                                                          |                             |                                               | GH51                                                                                              |                                                                                                         | releasing (1 $\rightarrow$ 2) and (1 $\rightarrow$ 3)- $\alpha$ -L-arabinofuranosyl residues from mono-substituted xylopyranosyl in arabinoxylan |
| GH54                    |                                                             | specific for O-3 linked arabinofuranosyl, Xylp is mono-substituted or di-substituted |                                                                                                          |                             |                                               |                                                                                                   |                                                                                                         |                                                                                                                                                  |
|                         |                                                             | GH62                                                                                 | removing arabinofuranosyl residues linked in O-2 or O-3 of mono-substituted xylose units in arabinoxylan |                             |                                               |                                                                                                   |                                                                                                         |                                                                                                                                                  |
| $\alpha$ -glucuronidase |                                                             | 3.2.1.139                                                                            | GH115                                                                                                    |                             | removing -MG side groups from polymeric xylan |                                                                                                   |                                                                                                         |                                                                                                                                                  |
| mannan                  |                                                             | cleave $\beta$ -(1,4)-glycosidic bonds of mannan backbone                            | endo- $\beta$ -1,4-mannanase                                                                             | 3.2.1.78                    | GH5                                           | Man                                                                                               | prefer glucomannan                                                                                      |                                                                                                                                                  |
|                         | GH26                                                        |                                                                                      |                                                                                                          |                             | prefer galactomannan                          |                                                                                                   |                                                                                                         |                                                                                                                                                  |
|                         | cleave T- $\alpha$ -(1,6)-glycosidic bonds of galactomannan | $\alpha$ -galactosidase                                                              | 3.2.1.22                                                                                                 | GH27                        |                                               | removing the $\alpha$ -1,6-linked d-galactopyranosyl substituents attached to the mannan backbone |                                                                                                         |                                                                                                                                                  |

**Supplementary Table 17. The light green colored cells indicate the tailored enzyme cocktail after screening and selection based on structural features of pectin and hemicellulose of parenchyma tissues (Parenchyma). Screening % refers to the percentages of candidate enzymes that can be ruled out theoretically based on structural characteristics of the substrate (i.e., Parenchyma). Literatures refer to Table 4.**

| Substrate (screening %) | Specific area                                               | Cleaving glycosidic bond                                           | Enzyme                                                         | EC number                   | CAZy family             | Abbreviation                                                                                    | Characteristics on the preferred structural features of the substrate                                                                                   |                                                                                                                |
|-------------------------|-------------------------------------------------------------|--------------------------------------------------------------------|----------------------------------------------------------------|-----------------------------|-------------------------|-------------------------------------------------------------------------------------------------|---------------------------------------------------------------------------------------------------------------------------------------------------------|----------------------------------------------------------------------------------------------------------------|
| Pectin (63)             | HG                                                          | cleave $\alpha$ -(1,4)-glycosidic bonds of GalpA backbone          | polygalacturonase                                              | 3.2.1.67                    | GH28                    | Exo-PG                                                                                          | prefer non-esterified HG, show decreasing activity with increasing degree of methyl-esterification                                                      |                                                                                                                |
|                         |                                                             |                                                                    |                                                                | 3.2.1.15                    | GH28                    | Endo-PG                                                                                         |                                                                                                                                                         |                                                                                                                |
|                         |                                                             |                                                                    | polymethyl galacturonase                                       | 3.2.1.-                     | GH28                    | Endo-PMG                                                                                        | HG with at least 75% of the carboxyl groups are esterified                                                                                              |                                                                                                                |
|                         |                                                             |                                                                    | pectate lyase                                                  | 4.2.2.2                     | PL1/P L2/PL 3/PL9 /PL10 | Endo-PGL                                                                                        | low methyl-esterified HG/non-esterified HG                                                                                                              |                                                                                                                |
|                         |                                                             |                                                                    | pectin lyase                                                   | 4.2.2.10                    | PL1                     | Endo-PNL                                                                                        | highly methyl-esterified HG                                                                                                                             |                                                                                                                |
|                         |                                                             |                                                                    | xylogalacturonan hydrolase                                     | 3.2.1.-                     | GH28                    | Endo-XGH                                                                                        | cleaves the $\beta$ -Xylp substituted GalpA backbone, prefers to act between two xylosidated GalA units                                                 |                                                                                                                |
|                         | HG (side chain)                                             | active on the side chains of HG                                    | pectin methyl esterase                                         | 3.1.1.11                    | CE8                     | PME                                                                                             | esterified HG                                                                                                                                           |                                                                                                                |
|                         |                                                             |                                                                    | pectin/rhamnogalacturonan acetyl esterase                      | 3.1.1.6                     | CE12                    | PAE, RGAE                                                                                       | acetylated HG/ acetylated RG                                                                                                                            |                                                                                                                |
|                         |                                                             |                                                                    |                                                                | 3.1.1.86                    | CE16                    | PAE                                                                                             |                                                                                                                                                         |                                                                                                                |
|                         | RG-I                                                        | cleave $\alpha$ -(1,2) glycosidic bonds between D-GalpA and L-Rhap | rhamnogalacturonan I hydrolase                                 | 3.2.1.171                   | GH28                    | Endo-RGH                                                                                        | activity is not hindered by galactose substitutions on the RG-I backbone                                                                                |                                                                                                                |
|                         |                                                             |                                                                    | cleave $\alpha$ -(1,4) glycosidic bonds between Rhap and GalpA | rhamnogalacturonan lyase    | 4.2.2.23                | PL4                                                                                             | Endo-RGL                                                                                                                                                | activity is increased by removal of acetyl groups and Ara side chains, decreased by removal of Gal side chains |
|                         |                                                             |                                                                    |                                                                | 4.2.2.23                    | PL11                    | Endo-RGL                                                                                        | prefer RGI backbone having galactan side chains without acetyl substitution                                                                             |                                                                                                                |
|                         |                                                             | cleave glycosidic bonds of arabinan/galactan                       | endo- $\alpha$ -L-1,5-arabinanase                              | 3.2.1.99                    | GH43                    | Endo-Ara                                                                                        | random hydrolyzing $\alpha$ -(1,4)-glycosidic bonds of arabinan                                                                                         |                                                                                                                |
|                         |                                                             |                                                                    | endo- $\beta$ -1,4-galactanase                                 | 3.2.1.89                    | GH53                    | Endo-Gal                                                                                        | random hydrolyzing $\beta$ -(1,4)-glycosidic bonds of arabinogalactan I                                                                                 |                                                                                                                |
|                         |                                                             |                                                                    | endo- $\beta$ -1,6-galactanase                                 | 3.2.1.164                   | GH30                    | Endo-Gal                                                                                        | random hydrolyzing $\beta$ -(1,6)-glycosidic bonds of arabinogalactan II                                                                                |                                                                                                                |
|                         | hemicellulose (65)                                          | xylan (main chain)                                                 | cleave $\beta$ -(1,4)-glycosidic bonds of xylan backbone       | endo-1,4- $\beta$ -xylanase | 3.2.1.8                 | GH10                                                                                            | Endo-Xyn                                                                                                                                                | require two unsubstituted consecutive Xylp, higher tolerance to substituents than GH10                         |
|                         |                                                             |                                                                    |                                                                |                             |                         | GH11                                                                                            |                                                                                                                                                         | prefer unsubstituted xylan, require three unsubstituted consecutive Xylp                                       |
|                         |                                                             |                                                                    |                                                                | arabinoxylanase             | 3.2.1.-                 | GH5                                                                                             |                                                                                                                                                         | hydrolyzes arabinoxylan but does not attack unsubstituted xylan                                                |
| glucuronoxylanase       |                                                             |                                                                    |                                                                | 3.2.1.136                   | GH30                    |                                                                                                 | hydrolyzes glucuronoxylan but does not attack unsubstituted xylan                                                                                       |                                                                                                                |
| xylan (side chains)     |                                                             | active on the side chains of xylan                                 | acetyl xylan esterase                                          | 3.1.1.72                    | CE1                     | AcXE                                                                                            | action on 2,3-di-O-acetylated Xylp in xylan                                                                                                             |                                                                                                                |
|                         |                                                             |                                                                    |                                                                |                             | CE3                     |                                                                                                 | deacetylated for O-2 or O-3 monoacetylated Xylp in xylan                                                                                                |                                                                                                                |
|                         |                                                             |                                                                    |                                                                |                             | CE4                     |                                                                                                 | deacetylated effectively for singly 2- or 3-O-acetylated Xylp residues in xylan                                                                         |                                                                                                                |
|                         |                                                             |                                                                    |                                                                |                             | CE5                     |                                                                                                 | prefer O-2 monoacetylated Xylp in xylan                                                                                                                 |                                                                                                                |
|                         |                                                             |                                                                    |                                                                |                             | CE6                     |                                                                                                 | deacetylated for 2,3-di-O-acetylated Xylp in xylan                                                                                                      |                                                                                                                |
|                         |                                                             |                                                                    | $\alpha$ -L-arabinofuranosidase                                | 3.2.1.55                    | GH43                    | Abf                                                                                             | hydrolyse (1 $\rightarrow$ 3)- $\alpha$ -L-arabinofuranosyl residues of doubly substituted xylopyranosyl residues in arabinoxylan                       |                                                                                                                |
|                         |                                                             |                                                                    |                                                                |                             | GH51                    |                                                                                                 | release (1 $\rightarrow$ 2) and (1 $\rightarrow$ 3)- $\alpha$ -L-arabinofuranosyl residues from mono-substituted xylopyranosyl residues in arabinoxylan |                                                                                                                |
|                         |                                                             |                                                                    |                                                                |                             | GH54                    |                                                                                                 | specific for O-3 linked arabinofuranosyl residues, Xylp is mono-substituted or di-substituted                                                           |                                                                                                                |
|                         |                                                             |                                                                    |                                                                |                             | GH62                    |                                                                                                 | removing arabinofuranosyl residues linked in position O-2 or O-3 of mono-substituted xylose units in arabinoxylan                                       |                                                                                                                |
|                         |                                                             |                                                                    | $\alpha$ -glucuronidase                                        | 3.2.1.139                   | GH115                   |                                                                                                 | removing 4-O-methyl glucuronic acid side groups from polymeric xylan                                                                                    |                                                                                                                |
| mannan                  |                                                             | cleave $\beta$ -(1,4)-glycosidic bonds of mannan backbone          | endo- $\beta$ -1,4-mannanase                                   | 3.2.1.78                    | GH5                     | Man                                                                                             | prefer glucomannan                                                                                                                                      |                                                                                                                |
|                         |                                                             |                                                                    |                                                                | GH26                        | prefer galactomannan    |                                                                                                 |                                                                                                                                                         |                                                                                                                |
|                         | cleave T- $\alpha$ -(1,6)-glycosidic bonds of galactomannan | $\alpha$ -galactosidase                                            | 3.2.1.22                                                       | GH27                        |                         | remove the $\alpha$ -1,6-linked d-galactopyranosyl substituents attached to the mannan backbone |                                                                                                                                                         |                                                                                                                |

**Supplementary Table 18. The summarized characterization techniques that were applied at this study for all samples of WW; WB; WIB; WFBF; Parenchyma.**

| category               | code                          | notes                                                    | HPA<br>EC | FT-IR | <sup>1</sup> H/ <sup>13</sup> C<br>nmr | HSQC<br>nmr | CP/MAS<br>nmr | staining                | GPC<br>(SEC) | HP<br>LC | GC-<br>MS |
|------------------------|-------------------------------|----------------------------------------------------------|-----------|-------|----------------------------------------|-------------|---------------|-------------------------|--------------|----------|-----------|
| original               | O                             | raw sample                                               | —         | —     |                                        |             | —             | —                       |              | —        |           |
| multiple<br>treatment  | E                             | solid residues after extraction with DCM/ acetone/ water |           |       |                                        |             |               |                         |              |          |           |
|                        | C                             | solid residues after citric acid extraction              | —         |       |                                        |             |               |                         |              |          |           |
|                        | N                             | solid residues after 0.1M NaOH treatment                 | —         | —     |                                        |             | —             |                         |              | —        |           |
| purified<br>substances | P                             | solid residues after peracetic acid treatment            | —         | —     |                                        |             |               |                         |              | —        |           |
|                        | HTS                           | hydrolysable tannin-like substances                      |           |       |                                        |             |               |                         |              |          | —         |
|                        | CAP;<br>DCA-P                 | purified pectin;<br>dialysis treated pectin              | —         |       |                                        | —           |               |                         | —            |          |           |
|                        | DMSO                          | solid residues after DMSO extraction                     | —         | —     |                                        |             |               |                         |              |          |           |
|                        | H                             | purified hemicellulose                                   | —         | —     | —                                      | —           |               | —<br>(parenchyma alone) | —            |          |           |
|                        | Dioxane                       | solid residues after dioxane lignin purification         | —         | —     |                                        |             | —             |                         |              | —        |           |
|                        | L                             | purified dioxane lignin                                  |           | —     | —                                      | —           | —             |                         | —            |          |           |
| WCW;<br>CEL            | Dou et al. 2018 <sup>15</sup> |                                                          |           |       |                                        | —           |               | —                       |              |          |           |
